# Supplementary material for: Rationalizing hydrogen bond solvation with Kamlet–Taft LSER and molecular torsion balances
Source: Royal Society of Chemistry journal article supplement (doi:10.1039/d3cp00615h), 2023-01-01
Supplement: d3cp00615h1.pdf [file d3cp00615h1.pdf]

Supporting Information for

**Rationalizing Hydrogen Bond Solvation with Kamlet-Taft LSER and  
Molecular Torsion Balances**

Bright U. Emenike, \* Arzu Sevimler, Amiel Farshadmand, and Armando J. Roman  
Department of Chemistry and Physics, State University of New York, 223 Store Hill Road,  
Old Westbury, NY 11568, USA

**Table of Contents**

|                                                                                                                                                                             |    |
|-----------------------------------------------------------------------------------------------------------------------------------------------------------------------------|----|
| General Experimental .....                                                                                                                                                  | 2  |
| Measurement of interaction energies ( $\Delta G$ ) and error analysis .....                                                                                                 | 2  |
| Synthesis of Balance 1 .....                                                                                                                                                | 3  |
| Figure S1. Synthetic scheme .....                                                                                                                                           | 3  |
| Preparation and characterization of 3-amino-N-butyl-4-methylbenzenesulfonamide (4) .....                                                                                    | 3  |
| Preparation and characterization of N-butyl-3-(2,5-dioxo-2,5-dihydro-1H-pyrrol-1-yl)-4-<br>methylbenzenesulfonamide (5).....                                                | 4  |
| Preparation and characterization of 2-(anthracen-2-yl)-4,5,6,7-tetrafluoroisindoline-1,3-<br>dione (6). .....                                                               | 5  |
| Diels-Alder: Preparation and characterization of Balance 1 .....                                                                                                            | 5  |
| Preparation and characterization of Balance 2.....                                                                                                                          | 6  |
| Table 1. Summary of solvent parameters .....                                                                                                                                | 6  |
| Symbols and definition:.....                                                                                                                                                | 6  |
| Table 2. Summary of experimental measurements and predicted values .....                                                                                                    | 7  |
| Plots of experimental H-bond ( $\Delta G_{\text{H-bond}}$ in kcal/mol) with solvent polarity parameters .....                                                               | 7  |
| Figure S2 A plot of $\Delta G_{\text{H-bond}}$ in kcal/mol against ET(30) solvent polarity parameter.....                                                                   | 8  |
| Figure S3 A plot of $\Delta G_{\text{H-bond}}$ in kcal/mol against solvents' dipole moment (in Debye) .....                                                                 | 8  |
| Figure S4 A plot of $\Delta G_{\text{H-bond}}$ (in kcal/mol) against solvents' dielectric constant solvent.....                                                             | 9  |
| Figure S5. Correlating the experimental $\Delta G_{\text{H-bond}}$ (in kcal/mol) with Hunter solvation<br>parameters (including $\pi^*$ dipolarity-polarization term) ..... | 9  |
| Summary of computational single-point calculations performed at the M06-2X/6-31+G* .....                                                                                    | 10 |
| using conformers optimized at the B3LYP/6-31G+* level.....                                                                                                                  | 10 |
| The cartesian coordinates for the optimized conformer at the B3LYP/6-31+G* level: Balance 1<br>folded conformer .....                                                       | 10 |

|                                                                                                                      |    |
|----------------------------------------------------------------------------------------------------------------------|----|
| The cartesian coordinates for the optimized conformer at the B3LYP/6-31G+* level: Balance 1 unfolded conformer ..... | 13 |
| The cartesian coordinates for the optimized conformer at the B3LYP/6-31G+* level: Balance 2 folded conformer .....   | 15 |
| The cartesian coordinates for the optimized conformer at the B3LYP/6-31G+* level: Balance 2 unfolded conformer ..... | 17 |
| References .....                                                                                                     | 19 |

## General Experimental

All reactions were carried out under an atmosphere of nitrogen in oven-dried glassware with magnetic stirring unless otherwise indicated. Reagents were purchased from commercial sources and used without further purification. Solvents for chemical reactions were dried. Purification of the reaction products was carried out by flash chromatography using silica gel 40-63  $\mu\text{m}$  (230-400 mesh) unless otherwise stated. Reactions were monitored by  $^1\text{H}$  NMR and/or thin-layer chromatography. Visualization was accomplished with UV light, staining with 5%  $\text{KMnO}_4$  followed by heating or with p-anisaldehyde in EtOH solution. NMR was recorded using a 400 MHz Bruker spectrometer. Data are reported as (s = singlet, d = doublet, t = triplet, q = quartet, m = multiplet; integration; coupling constant(s) in Hz). Melting points were measured with a Gallenkamp melting point apparatus.

## Measurement of interaction energies ( $\Delta\text{G}$ ) and error analysis

The folded/unfolded ratios were measured by proton NMR spectra at room temperature ( $\sim 25^\circ\text{C}$ ). The peak areas corresponding to the ortho methyl proton in the folded and unfolded states were integrated. The folding energies were estimated from the equation:  $\Delta\text{G} = -RT\ln K = -RT\ln[\text{folded}]/[\text{unfolded}]$ .

The error in the folding energies was estimated to be 0.03 kcal/mol based on a conservative estimate of the NMR measured folded/unfolded ratio of  $\pm 5\%$ . Multiple linear regression was performed with Excel, and the result (with errors included) are as follows:<sup>1</sup>

$$\delta(\ln K) = \delta K/K = 0.05$$

$$\delta(\Delta\text{G}) = RT[\delta(\ln K)] = 0.03 \text{ kcal/mol}$$

## Synthesis of Balance 1

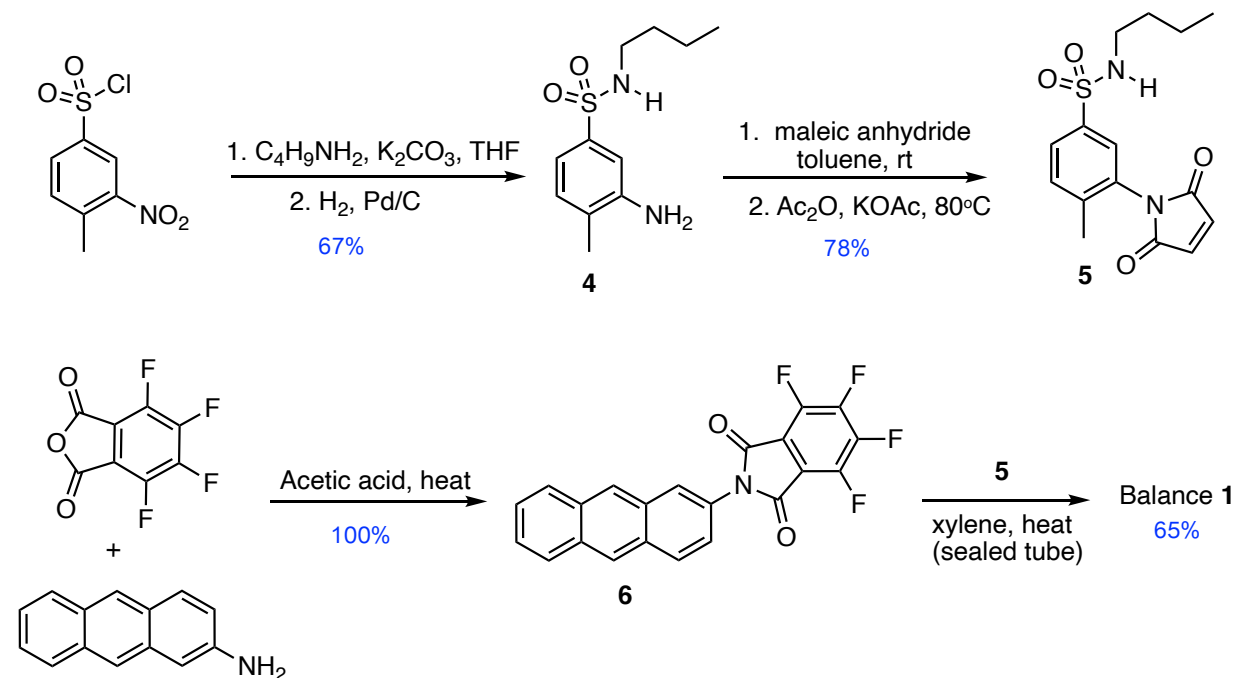

Figure S1. Synthetic scheme

### Preparation and characterization of 3-amino-N-butyl-4-methylbenzenesulfonamide (**4**)

In a 100 ml round-bottom flask, 4-methyl-3-nitrobenzenesulfonyl chloride (1.5 g, 6.38 mmol) was dissolved in 20 ml of 50% (v/v) aqueous THF. To the mixture,  $K_2CO_3$  (1.32g, 9.57 mmol) and butylamine (0.7g, 9.57 mmol) were added sequentially at room temperature. The reaction flask was then heated to reflux for 2 hours, and the reaction progress was monitored by TLC. After completion, the reaction was cooled to room temperature and the volume was reduced to half by removing solvent under reduced pressure. Next, 20 ml of water was added, and the mixture was extracted three times using 20 mL portions of ethyl acetate. The combined organic layers were washed with brine and water, dried over anhydrous  $MgSO_4$ , and concentrated to yield the crude intermediate. The crude intermediate (dissolved in 15 mL ethyl acetate) was then added to 150 mg of 10% Pd/C and the reaction was stirred overnight under normal atmospheric pressure of hydrogen gas. The reaction mixture was filtered, and the concentrated product was purified by flash column chromatography using mixtures of ethyl acetate and hexane to yield 1.04 g of 3-amino-N-butyl-4-methylbenzenesulfonamide (**4**).

Proton NMR:

$^1\text{H}$  NMR (400 MHz,  $\text{CDCl}_3$ )  $\delta$  7.15 (t,  $J = 8.4$  Hz, 3H), 4.96 (t,  $J = 6.1$  Hz, 1H), 3.97 (s, 2H), 2.88 (q,  $J = 6.8$  Hz, 2H), 2.18 (d,  $J = 3.4$  Hz, 3H), 1.42 (m, 2H), 1.26 (m, 2H), 0.83 (t,  $J = 7.3$  Hz, 3H)

Carbon NMR:

$^{13}\text{C}\{1\text{H}\}$  NMR (101 MHz,  $\text{CDCl}_3$ )  $\delta$  145.5, 137.9, 130.8, 127.1, 116.6, 112.6, 42.9, 31.5, 19.7, 17.5, 13.6

Mass spec: ESI(MS) for  $\text{C}_{11}\text{H}_{18}\text{N}_2\text{O}_2\text{S}$  ( $\text{M}+\text{Na}$ ) $^+$ ; calcd 265.0987, found 265.0980

### **Preparation and characterization of N-butyl-3-(2,5-dioxo-2,5-dihydro-1H-pyrrol-1-yl)-4-methylbenzenesulfonamide (5)**

A mixture of 3-amino-*N*-butyl-4-methylbenzenesulfonamide (1.2 g, 4.95 mmol) and maleic anhydride (0.5 g, 5.1 mmol) was prepared in 10 ml of toluene and was stirred overnight at room temperature. The toluene was removed by decantation, and acetic anhydride (20 ml) and potassium acetate (0.15 g) were added to the mixture. The reaction was heated for 30 mins, and progress was monitored by TLC. The acetic anhydride was removed under reduced pressure, and 20 ml of water was carefully added. The aqueous mixture was extracted three times using 15 ml portions of diethyl ether, and the combined extracts were washed with brine and water before being dried with anhydrous  $\text{MgSO}_4$ . The product was purified by column chromatography to yield 1.24 g (78%) of N-butyl-3-(2,5-dioxo-2,5-dihydro-1H-pyrrol-1-yl)-4-methylbenzenesulfonamide (5).

Proton NMR:

$^1\text{H}$  NMR (400 MHz,  $\text{CDCl}_3$ )  $\delta$  7.82 (q,  $J = 3.3$ , 1H), 7.66 (d,  $J = 1.9$  Hz, 1H), 7.49 (d,  $J = 8.1$  Hz, 1H), 6.92 (s, 2H), 4.79 (t,  $J = 6.1$  Hz, 1H), 2.97 (q,  $J = 6.8$  Hz, 2H), 2.25 (s, 3H), 1.46 (m,  $J = 4.9$  Hz, 2H), 1.32 (m,  $J = 7.4$  Hz, 2H), 0.87 (t,  $J = 7.3$ , 3H)

Carbon NMR:

$^{13}\text{C}\{1\text{H}\}$  NMR (101 MHz,  $\text{CDCl}_3$ )  $\delta$  168.9, 142.0, 138.7, 134.6, 131.9, 130.8, 127.8, 127.6, 43.0, 31.6, 19.7, 18.3, 13.5

Mass spec: ESI(MS) for  $\text{C}_{15}\text{H}_{18}\text{N}_2\text{O}_4\text{S}$  ( $\text{M}+\text{Na}$ ) $^+$ ; calcd 345.0885, found 345.0880

### Preparation and characterization of 2-(anthracen-2-yl)-4,5,6,7-tetrafluoroisoindoline-1,3-dione (**6**).

A mixture containing 2-aminoanthracene (0.386 g, 2mmol) and pentafluorophthalic anhydride (0.44 g, 2mmol) in 15 ml acetic acid was then heated and refluxed overnight. The reaction was cooled, and water was added to it. The desired product was isolated by filtration. The filtrate was washed several times, first with water, then with a small amount of cold acetone, and finally with hexane. The resulting dried product was found to be pure and was used without further purification. The yield of the product (**6**) was 0.78 g.

Proton NMR:

$^1\text{H}$  NMR (400 MHz, DMSO- $d_6$ )  $\delta$  7.43 (m, 3H), 8.04 (m, 3H), 8.40 (m, 3H)

Carbon NMR:

$^{13}\text{C}\{1\text{H}\}$  NMR (101 MHz, DMSO- $d_6$ )  $\delta$  169.9, 136.4, 132.1, 131.9, 130.9, 129.3, 128.3, 128.9, 128.9, 128.5, 128.1, 126.3, 126.2, 125.5, 125.4, 121.4, 114.4

Mass spec: CI(MS) for  $\text{C}_{22}\text{H}_9\text{NO}_2\text{F}_4$  (M) $^+$ ; calcd 395.0569, found 395.0574

### Diels-Alder: Preparation and characterization of Balance 1

A mixture of **5** (0.2 g, 0.85 mmol) and **6** (0.28 g, 0.71 mmol) in 1 ml xylene was heated in a sealed reaction tube for two days. The cooled reaction was then purified by column chromatography to yield 0.33g of balance **1**.

Proton NMR:

$^1\text{H}$  NMR (400 MHz,  $\text{CDCl}_3$ )  $\delta$  7.69 (q,  $J = 3.3$  Hz, 1H), 7.53 (d,  $J = 1.9$  Hz), 7.49 (m,  $J = 2.7$  Hz, 3H), 7.39 (q,  $J = 3.3$  Hz, 1H), 7.33 (d, 2H), 6.14 (d,  $J = 1.8$  Hz, 1H), 5.27 (q,  $J = 4.0$  Hz, 1H), 4.99 (d,  $J = 1.7$  Hz, 2H), 3.50 (t,  $J = 1.5$  Hz, 2H), 2.98 (m,  $J = 6.6$  Hz, 1H), 2.79 (m,  $J = 6.1$  Hz, 1H), 1.49 (m,  $J = 6.3$  Hz, 2H), 1.37 (q,  $J = 7.4$  Hz, 2H), 0.93 (t,  $J = 7.3$  Hz, 3H)

Carbon NMR:

$^{13}\text{C}\{1\text{H}\}$  NMR (101 MHz,  $\text{CDCl}_3$ )  $\delta$  175.4, 174.9, 162.3, 142.5, 140.7, 140.3, 140.2, 139.6, 139.3, 138.7, 131.6, 130.9, 129.3, 128.4, 127.7, 127.4, 127.3, 126.3, 126.2, 125.6, 124.6, 122.8, 113.4, 47.1, 47.1, 46.0, 45.6, 45.3, 45.1, 43.0, 31.6, 31.3, 19.7, 18.0, 17.0, 13.6, 13.5

Mass spec: ESI(MS) for  $\text{C}_{37}\text{H}_{27}\text{N}_3\text{O}_6\text{SF}_4$  (M+Na) $^+$ ; calcd 740.1449, found 740.1450

Melting point: 239 – 241°C

## Preparation and characterization of Balance 2

A mixture of anthracene (0.18g, 1 mmol) and **5** (0.282 g, 1.2 mmol) in 1 ml xylene was heated in a sealed reaction tube overnight. The cooled reaction was then purified by column chromatography to yield 0.395g (96%) of balance **2**.

Proton NMR:

$^1\text{H}$  NMR (400 MHz,  $\text{CDCl}_3$ )  $\delta$  7.69 (m,  $J = 2.5$  Hz, 1H), 7.33 (m, 9H), 5.94 (d,  $J = 1.8$  Hz, 1H), 4.92 (s, 2H), 4.36 (dt,  $J = 5.8$ , 1H), 3.45 (q,  $J = 1.7$ , 2H), 2.91 (m,  $J = 6.7$  Hz, 1.5H), 2.15 (s, 2H), 1.37 (m, 4H), 1.14 (s, 1.7H), 0.93 (t,  $J = 7.3$  Hz, 1.5 H), 0.87 (t,  $J = 7.3$  Hz, 1.5H)

Carbon NMR:

$^{13}\text{C}\{1\text{H}\}$  NMR (101 MHz,  $\text{CDCl}_3$ )  $\delta$  175.6, 175.5, 141.7, 141.1, 141.0, 139.3, 138.6, 138.6, 138.3, 131.7, 131.5, 131.3, 127.6, 127.4, 127.1, 126.9, 126.9, 126.8, 125.5, 125.2, 124.3, 47.3, 45.9, 45.3, 43.0, 31.6, 31.5, 19.8, 19.7, 17.9, 16.7, 13.6, 13.6

Mass spec: ESI(MS) for  $\text{C}_{29}\text{H}_{28}\text{N}_2\text{O}_4\text{S}$  ( $\text{M}+\text{Na}^+$ ); calcd 523.1, found 523.2

Melting point: 122 – 124 °C

**Table 1. Summary of solvent parameters**

| solvents                 | Kamlet-Taft parameters |         |         |          | solvent polarity |       |            | Hunter parameters |           |
|--------------------------|------------------------|---------|---------|----------|------------------|-------|------------|-------------------|-----------|
|                          | $\alpha$               | $\beta$ | $\pi^*$ | $\delta$ | $E_T(30)$        | $\mu$ | $\epsilon$ | $\alpha_s$        | $\beta_s$ |
| $\text{CCl}_4$           | 0                      | 0.1     | 0.58    | 0.5      | 32.4             | 0     | 2.2        | 1.4               | 0.6       |
| toluene                  | 0                      | 0.11    | 0.54    | 1        | 33.9             | 0.31  | 2.4        | 1                 | 2.1       |
| benzene                  | 0                      | 0.1     | 0.59    | 1        | 34.3             | 0     | 2.3        | 1.1               | 1.6       |
| chloroform               | 0.2                    | 0.1     | 0.58    | 0.5      | 39.1             | 1.15  | 4.8        | 2.2               | 1.3       |
| $\text{CH}_2\text{Cl}_2$ | 0.13                   | 0.1     | 0.82    | 0.5      | 40.7             | 1.14  | 8.9        | 1.7               | 1.1       |
| acetic acid              | 1.12                   | 0.45    | 0.64    | 0        | 55.2             | 1.78  | 6.2        | 3.7               | 4.9       |
| acetone                  | 0.08                   | 0.43    | 0.71    | 0        | 42.2             | 2.69  | 21         | 1.2               | 5.7       |
| acetonitrile             | 0.19                   | 0.4     | 0.75    | 0        | 45.6             | 3.5   | 36.6       | 1.5               | 5.1       |
| methanol                 | 0.98                   | 0.66    | 0.6     | 0        | 55.4             | 2.87  | 32.6       | 2.8               | 4.8       |
| pyridine                 | 0                      | 0.64    | 0.87    | 1        | 40.5             | 2.37  | 12.3       | 1.2               | 7.2       |
| ethanol                  | 0.86                   | 0.75    | 0.54    | 0        | 51.9             | 1.66  | 24.6       | 2.7               | 5.2       |
| DMF                      | 0                      | 0.69    | 0.88    | 0        | 43.8             | 3.9   | 36.7       | 2.2               | 7.4       |
| DMSO                     | 0                      | 0.76    | 1       | 0        | 45.1             | 4.1   | 47         | 0.8               | 8.9       |
| <i>t</i> -butanol        | 0.42                   | 0.93    | 0.41    | 0        | 43.7             | 1.31  | 10.9       | 2.7               | 5.7       |

Symbols and definition:

$\alpha$  = Kamlet-Taft parameter describing hydrogen bond donor ability

$\beta$  = Kamlet-Taft parameter describing hydrogen bond acceptor ability  
 $\pi^*$  = Kamlet-Taft parameter describing dipolarity-polarizability  
 $\delta$  = correction factor: 0.5 for chlorinated solvent, 1.0 for aromatic solvents  
 $E_T(30)$  = Reichardt's solvent-polarity parameter  
 $\mu$  = solvent dipole moment in Debye  
 $\epsilon$  = relative permittivity (dielectric constant)  
 $\alpha_s$  = Hunter solvent hydrogen-bond donor parameter  
 $\beta_s$  = Hunter hydrogen-bond acceptor parameter

**Table 2. Summary of experimental measurements and predicted values**

| solvents                        | % folded |    | equilibrium constants |             | folding energy (kcal/mol) |               | H-bond energy (kcal/mol) |               |          |
|---------------------------------|----------|----|-----------------------|-------------|---------------------------|---------------|--------------------------|---------------|----------|
|                                 | 1        | 2  | $K_{eq}(1)$           | $K_{eq}(2)$ | $\Delta G(1)$             | $\Delta G(2)$ | expt.                    | (Kamlet-Taft) | (Hunter) |
| CCl <sub>4</sub>                | 82       | 46 | 4.56                  | 0.85        | -0.90                     | 0.09          | -0.99                    | -0.87         | -1.02    |
| toluene                         | 84       | 52 | 5.25                  | 1.08        | -0.98                     | -0.05         | -0.93                    | -1.02         | -0.85    |
| benzene                         | 85       | 53 | 5.67                  | 1.13        | -1.03                     | -0.07         | -0.96                    | -1.01         | -0.96    |
| chloroform                      | 83       | 50 | 4.88                  | 1.00        | -0.94                     | 0.00          | -0.94                    | -0.90         | -0.84    |
| CH <sub>2</sub> Cl <sub>2</sub> | 82       | 53 | 4.56                  | 1.13        | -0.90                     | -0.07         | -0.83                    | -0.71         | -0.92    |
| acetic acid                     | 50       | 49 | 1.00                  | 0.96        | 0.00                      | 0.02          | -0.02                    | -0.11         | 0.17     |
| acetone                         | 34       | 40 | 0.52                  | 0.67        | 0.39                      | 0.24          | 0.15                     | 0.05          | 0.29     |
| acetonitrile                    | 39       | 42 | 0.64                  | 0.72        | 0.26                      | 0.19          | 0.07                     | 0.00          | 0.16     |
| methanol                        | 39       | 51 | 0.64                  | 1.04        | 0.26                      | -0.02         | 0.29                     | 0.32          | 0.13     |
| pyridine                        | 31       | 44 | 0.45                  | 0.79        | 0.47                      | 0.14          | 0.33                     | 0.34          | 0.30     |
| ethanol                         | 35       | 51 | 0.54                  | 1.04        | 0.37                      | -0.02         | 0.39                     | 0.48          | 0.22     |
| DMF                             | 19       | 42 | 0.23                  | 0.72        | 0.86                      | 0.19          | 0.67                     | 0.73          | 0.69     |
| DMSO                            | 9        | 35 | 0.10                  | 0.54        | 1.37                      | 0.37          | 1.00                     | 0.97          | 0.99     |
| <i>t</i> -butanol               | 64       | 39 | 1.78                  | 0.64        | -0.34                     | 0.26          | -0.61                    | 0.85          | 0.37     |

**Plots of experimental H-bond ( $\Delta G_{H-bond}$  in kcal/mol) with solvent polarity parameters**

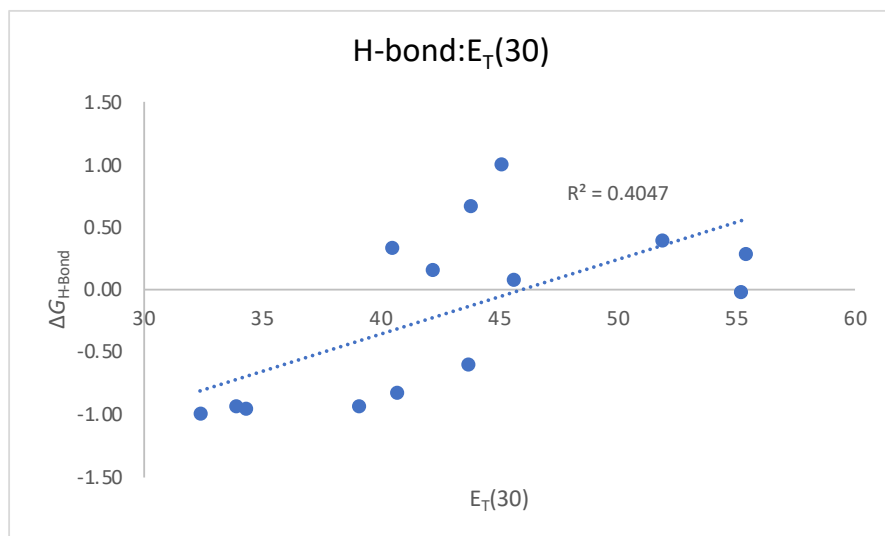

Figure S2 A plot of  $\Delta G_{H-bond}$  in kcal/mol against  $E_T(30)$  solvent polarity parameter

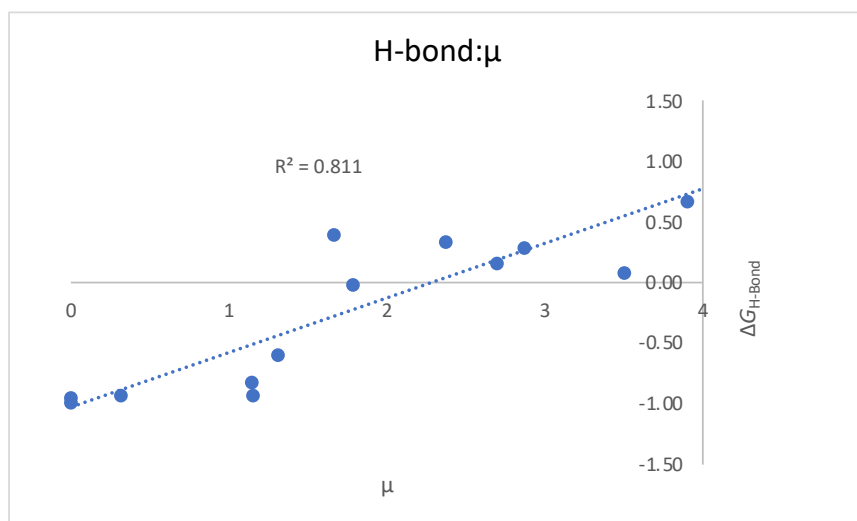

Figure S3 A plot of  $\Delta G_{H-bond}$  in kcal/mol against solvents' dipole moment (in Debye)



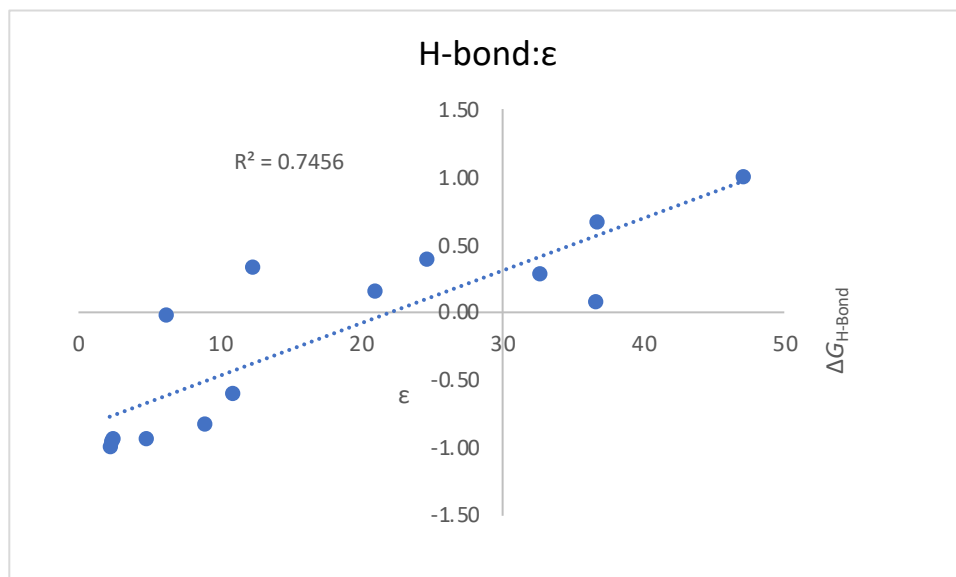

Figure S4 A plot of  $\Delta G_{\text{H-bond}}$  (in kcal/mol) against solvents' dielectric constant solvent

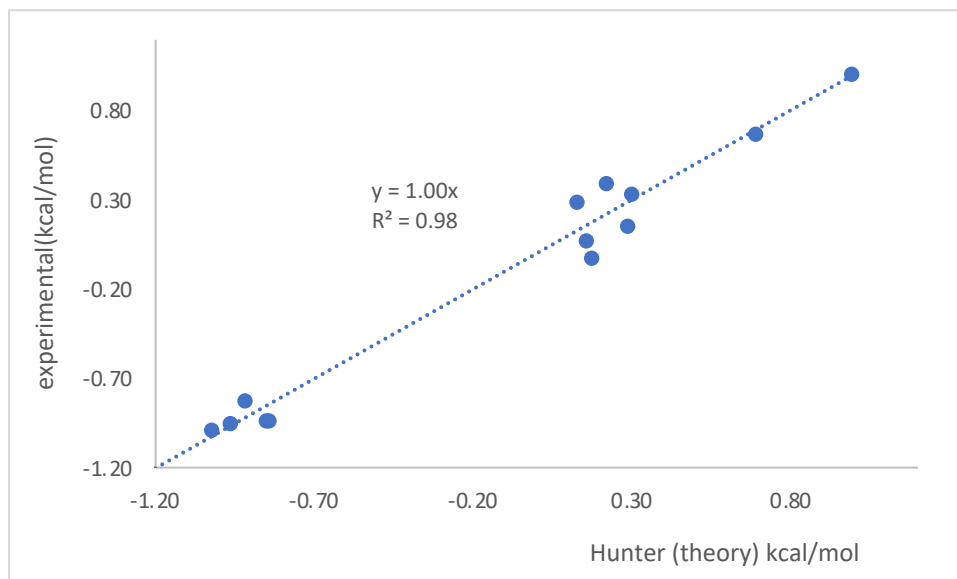

Figure S5. Correlating the experimental  $\Delta G_{\text{H-bond}}$  (in kcal/mol) with Hunter solvation parameters (including  $\pi^*$  dipolarity-polarization term)

$$\Delta G_{\text{H-Bond}} = -1.0 + 0.03\alpha_s + 0.28\beta_s - 0.06\pi^* - 0.32\delta$$

**Summary of computational single-point calculations performed at the M06-2X/6-31+G\* using conformers optimized at the B3LYP/6-31G+\* level**

| Model System | Conformer | Total Energy |             | Relative Energies |            | Imaginary Frequency |
|--------------|-----------|--------------|-------------|-------------------|------------|---------------------|
|              |           | (a.u)        | (kcal/mol)  | (a.u)             | (kcal/mol) |                     |
| 1            | folded    | -2838.454735 | -1781158.73 | -0.005403         | -3.39      | 0                   |
| 1            | unfolded  | -2838.449332 | -1781155.34 | 0                 | 0.00       | 0                   |
| 2            | folded    | -1929.919842 | -1211044.00 | -0.00071          | -0.45      | 0                   |
| 2            | unfolded  | -1929.919132 | -1211043.55 | 0                 | 0.00       | 0                   |

**The cartesian coordinates for the optimized conformer at the B3LYP/6-31+G\* level:  
Balance 1 folded conformer**

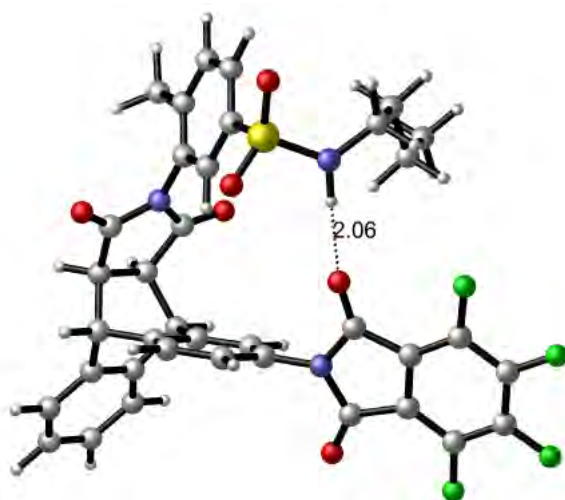

|       |         |          |         |
|-------|---------|----------|---------|
| C-C_R | 2.11643 | -0.14443 | 4.79692 |
| C-C_R | 1.88722 | 1.19886  | 4.44644 |
| C-C_3 | 1.3801  | -1.13306 | 3.90498 |
| H-H_  | 1.56594 | -2.17578 | 4.17346 |
| C-C_3 | 0.96519 | 1.35808  | 3.24639 |

|         |          |          |          |
|---------|----------|----------|----------|
| C-C_R   | 1.75722  | -0.82154 | 2.4669   |
| C-C_R   | 2.36443  | 0.06371  | -0.094   |
| C-C_R   | 2.25629  | -1.72246 | 1.52871  |
| C-C_R   | 1.54546  | 0.52488  | 2.11649  |
| C-C_R   | 1.84227  | 0.97218  | 0.83384  |
| C-C_R   | 2.56997  | -1.27558 | 0.24056  |
| H-H_    | 2.40241  | -2.76721 | 1.78983  |
| H-H_    | 1.67839  | 2.00776  | 0.54928  |
| H-H_    | 2.96407  | -1.96493 | -0.49971 |
| C-C_3   | -0.14356 | -0.78554 | 4.07396  |
| H-H_    | -0.43237 | -0.98649 | 5.11033  |
| C-C_3   | -0.39262 | 0.68309  | 3.66051  |
| H-H_    | -0.84283 | 1.27292  | 4.46565  |
| C-C_R   | -1.03791 | -1.61507 | 3.1617   |
| C-C_R   | -1.39106 | 0.60824  | 2.50883  |
| O-O_R   | -1.15784 | -2.82092 | 3.16388  |
| O-O_R   | -1.84013 | 1.54225  | 1.87548  |
| N-N_R   | -1.7186  | -0.73833 | 2.29461  |
| C-C_R   | -2.58762 | -1.19684 | 1.24597  |
| C-C_R   | -4.21132 | -2.18153 | -0.79068 |
| C-C_R   | -3.9781  | -1.01191 | 1.34384  |
| C-C_R   | -2.00888 | -1.85545 | 0.16191  |
| C-C_R   | -2.82707 | -2.33991 | -0.85745 |
| C-C_R   | -4.76917 | -1.5178  | 0.30264  |
| H-H_    | -4.84117 | -2.59414 | -1.57227 |
| N-N_R   | 2.69999  | 0.52412  | -1.41112 |
| C-C_R   | 3.80046  | 1.36967  | -1.68835 |
| C-C_R   | 1.98426  | 0.18345  | -2.56856 |
| O-O_R   | 4.57211  | 1.81731  | -0.87239 |
| O-O_R   | 0.99215  | -0.51518 | -2.60777 |
| C-C_R   | 3.77948  | 1.57254  | -3.16982 |
| C-C_R   | 3.27214  | 1.61323  | -5.89502 |
| C-C_R   | 4.61687  | 2.30456  | -3.99221 |
| C-C_R   | 2.69215  | 0.86039  | -3.69737 |
| C-C_R   | 2.42782  | 0.87226  | -5.05541 |
| C-C_R   | 4.35361  | 2.32096  | -5.36981 |
| H-H_    | 0.8067   | 2.40094  | 2.96195  |
| S-S_3+4 | -2.06869 | -3.18734 | -2.26395 |

|       |          |          |          |
|-------|----------|----------|----------|
| O-O_2 | -3.13958 | -3.95283 | -2.91442 |
| O-O_2 | -0.8506  | -3.8169  | -1.74236 |
| N-N_3 | -1.56143 | -2.05423 | -3.35601 |
| H-H_  | -0.69151 | -1.59198 | -3.10163 |
| C-C_3 | -2.41327 | -1.46468 | -4.39271 |
| C-C_R | 2.48332  | 2.22612  | 5.17361  |
| H-H_  | 2.30987  | 3.26498  | 4.90098  |
| C-C_R | 3.31659  | 1.90926  | 6.25543  |
| H-H_  | 3.79059  | 2.70636  | 6.82218  |
| C-C_R | 3.545    | 0.5756   | 6.60262  |
| H-H_  | 4.19538  | 0.33662  | 7.43997  |
| C-C_R | 2.94119  | -0.4587  | 5.87396  |
| H-H_  | 3.12067  | -1.49722 | 6.14389  |
| H-H_  | -3.12705 | -2.23606 | -4.69504 |
| H-H_  | -1.75962 | -1.28002 | -5.25531 |
| C-C_3 | -3.14901 | -0.16898 | -4.01528 |
| H-H_  | -3.81912 | 0.07886  | -4.85261 |
| H-H_  | -3.7948  | -0.34972 | -3.14557 |
| C-C_3 | -2.22912 | 1.02663  | -3.73511 |
| H-H_  | -1.57348 | 1.18616  | -4.6044  |
| H-H_  | -1.56938 | 0.79255  | -2.88952 |
| C-C_3 | -3.00269 | 2.31564  | -3.43169 |
| H-H_  | -3.64325 | 2.60316  | -4.27565 |
| H-H_  | -2.32334 | 3.15264  | -3.22929 |
| H-H_  | -3.64627 | 2.19202  | -2.55186 |
| F-F_  | 1.40309  | 0.21193  | -5.60076 |
| F-F_  | 3.04401  | 1.64773  | -7.20962 |
| F-F_  | 5.13836  | 3.02218  | -6.1904  |
| F-F_  | 5.66091  | 2.99503  | -3.53071 |
| H-H_  | -0.93537 | -2.00849 | 0.12413  |
| H-H_  | -5.84862 | -1.40185 | 0.35966  |
| C-C_3 | -4.606   | -0.30878 | 2.52096  |
| H-H_  | -5.69532 | -0.40711 | 2.49489  |
| H-H_  | -4.36055 | 0.75987  | 2.5163   |
| H-H_  | -4.25379 | -0.72574 | 3.47216  |

The cartesian coordinates for the optimized conformer at the B3LYP/6-31G+\* level:  
Balance 1 unfolded conformer

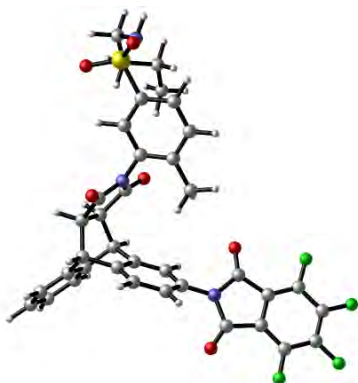

|       |          |          |          |
|-------|----------|----------|----------|
| C-C_R | -2.81235 | 3.70679  | -0.20028 |
| C-C_R | -2.32589 | 3.46543  | 1.09893  |
| C-C_3 | -2.36908 | 2.65871  | -1.21426 |
| H-H_  | -2.76417 | 2.83653  | -2.21716 |
| C-C_3 | -1.46268 | 2.21367  | 1.19474  |
| C-C_R | -2.77058 | 1.30285  | -0.66068 |
| C-C_R | -3.40222 | -1.06649 | 0.65875  |
| C-C_R | -3.55635 | 0.34657  | -1.29926 |
| C-C_R | -2.28558 | 1.06372  | 0.63803  |
| C-C_R | -2.60051 | -0.11503 | 1.30573  |
| C-C_R | -3.87228 | -0.84516 | -0.63895 |
| H-H_  | -3.92767 | 0.52199  | -2.30567 |
| H-H_  | -2.23069 | -0.29952 | 2.30903  |
| H-H_  | -4.49368 | -1.58931 | -1.12464 |
| C-C_3 | -0.80261 | 2.72603  | -1.21403 |
| H-H_  | -0.5003  | 3.70473  | -1.60256 |
| C-C_3 | -0.2662  | 2.47784  | 0.21448  |
| H-H_  | 0.30052  | 3.33217  | 0.599    |
| C-C_R | -0.12961 | 1.66814  | -2.08323 |
| C-C_R | 0.71124  | 1.31591  | 0.07809  |
| O-O_R | -0.29415 | 1.48667  | -3.27032 |
| O-O_R | 1.36969  | 0.81004  | 0.96353  |
| N-N_R | 0.75439  | 0.93202  | -1.27189 |
| C-C_R | 1.68742  | -0.03439 | -1.78431 |

|         |          |          |          |
|---------|----------|----------|----------|
| C-C_R   | 3.57869  | -1.8269  | -2.77348 |
| C-C_R   | 2.8127   | 0.45006  | -2.45338 |
| C-C_R   | 1.47595  | -1.41019 | -1.59714 |
| C-C_R   | 2.44472  | -2.28776 | -2.11018 |
| C-C_R   | 3.75632  | -0.45189 | -2.93481 |
| H-H_    | 2.94986  | 1.51568  | -2.6038  |
| H-H_    | 4.31129  | -2.52342 | -3.16891 |
| N-N_R   | -3.74638 | -2.27919 | 1.33742  |
| C-C_R   | -5.06296 | -2.79006 | 1.42672  |
| C-C_R   | -2.81022 | -3.11015 | 1.99208  |
| O-O_R   | -6.05771 | -2.28477 | 0.95768  |
| O-O_R   | -1.61691 | -2.91682 | 2.06817  |
| C-C_R   | -4.94821 | -4.05848 | 2.20882  |
| C-C_R   | -4.17507 | -6.28209 | 3.67361  |
| C-C_R   | -5.91453 | -4.97115 | 2.5945   |
| C-C_R   | -3.60175 | -4.24811 | 2.54936  |
| C-C_R   | -3.20077 | -5.35359 | 3.27899  |
| C-C_R   | -5.51534 | -6.09295 | 3.33571  |
| H-H_    | -1.09692 | 2.01873  | 2.20579  |
| C-C_3   | 0.26337  | -1.93881 | -0.87738 |
| H-H_    | 0.27086  | -1.65661 | 0.18088  |
| H-H_    | 0.22905  | -3.03091 | -0.92983 |
| H-H_    | -0.66144 | -1.54918 | -1.3172  |
| H-H_    | 2.30063  | -3.35772 | -1.98442 |
| S-S_3+4 | 5.22845  | 0.16336  | -3.76188 |
| O-O_2   | 5.01844  | 1.59691  | -4.00751 |
| O-O_2   | 5.55727  | -0.77048 | -4.84829 |
| N-N_3   | 6.46413  | -0.0512  | -2.62328 |
| H-H_    | 7.21107  | -0.55189 | -3.09915 |
| C-C_3   | 6.92357  | 1.09794  | -1.80969 |
| C-C_R   | -2.6301  | 4.34086  | 2.13744  |
| H-H_    | -2.25271 | 4.15483  | 3.14079  |
| C-C_R   | -3.43096 | 5.46268  | 1.88023  |
| H-H_    | -3.67681 | 6.14625  | 2.68865  |
| C-C_R   | -3.9135  | 5.70314  | 0.59171  |
| H-H_    | -4.53491 | 6.57363  | 0.39837  |
| C-C_R   | -3.60284 | 4.82433  | -0.4558  |
| H-H_    | -3.97863 | 5.01357  | -1.4591  |

|       |          |          |          |
|-------|----------|----------|----------|
| H-H_  | 6.90527  | 2.0183   | -2.40545 |
| H-H_  | 7.97049  | 0.88102  | -1.56616 |
| C-C_3 | 6.12477  | 1.28905  | -0.51661 |
| H-H_  | 6.50136  | 2.2049   | -0.03742 |
| H-H_  | 5.07284  | 1.48738  | -0.76191 |
| C-C_3 | 6.21283  | 0.11891  | 0.4717   |
| H-H_  | 7.27096  | -0.07531 | 0.7054   |
| H-H_  | 5.82979  | -0.79027 | -0.00812 |
| C-C_3 | 5.44136  | 0.38301  | 1.77079  |
| H-H_  | 5.82406  | 1.27561  | 2.28305  |
| H-H_  | 5.5314   | -0.46209 | 2.46375  |
| H-H_  | 4.37337  | 0.53979  | 1.57597  |
| F-F_  | -1.9304  | -5.57319 | 3.62419  |
| F-F_  | -3.82531 | -7.3595  | 4.38032  |
| F-F_  | -6.42078 | -6.9932  | 3.72527  |
| F-F_  | -7.20638 | -4.83201 | 2.2905   |

**The cartesian coordinates for the optimized conformer at the B3LYP/6-31G+\* level:  
Balance 2 folded conformer**

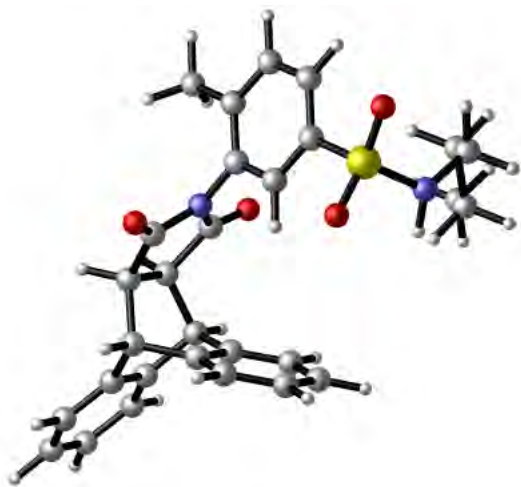

|       |         |          |         |
|-------|---------|----------|---------|
| C-C_R | 2.80322 | 0.28408  | 3.75049 |
| C-C_R | 2.51264 | 1.60568  | 3.36364 |
| C-C_3 | 2.0954  | -0.7601  | 2.90056 |
| H-H_  | 2.32974 | -1.78548 | 3.19743 |
| C-C_3 | 1.56408 | 1.68953  | 2.17717 |

|         |          |          |          |
|---------|----------|----------|----------|
| C-C_R   | 2.43278  | -0.47687 | 1.44604  |
| C-C_R   | 2.95248  | 0.35403  | -1.16531 |
| C-C_R   | 2.95909  | -1.38412 | 0.52822  |
| C-C_R   | 2.1527   | 0.84626  | 1.05765  |
| C-C_R   | 2.40883  | 1.26267  | -0.24707 |
| C-C_R   | 3.22294  | -0.96272 | -0.78207 |
| H-H_    | 3.16194  | -2.41029 | 0.82541  |
| H-H_    | 2.19053  | 2.28436  | -0.55026 |
| H-H_    | 3.63647  | -1.66494 | -1.50091 |
| C-C_3   | 0.56105  | -0.47182 | 3.08917  |
| H-H_    | 0.29541  | -0.66002 | 4.13437  |
| C-C_3   | 0.24458  | 0.97634  | 2.64774  |
| H-H_    | -0.20503 | 1.56883  | 3.45144  |
| C-C_R   | -0.31286 | -1.35778 | 2.21173  |
| C-C_R   | -0.78051 | 0.837    | 1.52817  |
| O-O_R   | -0.38282 | -2.56747 | 2.23501  |
| O-O_R   | -1.29205 | 1.73573  | 0.89061  |
| N-N_R   | -1.05212 | -0.52722 | 1.34586  |
| C-C_R   | -1.91825 | -1.03412 | 0.32034  |
| C-C_R   | -3.53698 | -2.0683  | -1.69834 |
| C-C_R   | -3.31321 | -0.89231 | 0.43317  |
| C-C_R   | -1.3325  | -1.67964 | -0.76793 |
| C-C_R   | -2.14901 | -2.18835 | -1.7768  |
| C-C_R   | -4.10122 | -1.42188 | -0.59857 |
| H-H_    | -4.16219 | -2.4927  | -2.47734 |
| H-H_    | 1.35557  | 2.71633  | 1.86679  |
| S-S_3+4 | -1.39007 | -2.98823 | -3.20462 |
| O-O_2   | -2.45041 | -3.75836 | -3.86197 |
| O-O_2   | -0.13578 | -3.59035 | -2.7418  |
| N-N_3   | -0.91603 | -1.81007 | -4.28944 |
| H-H_    | -0.04941 | -1.36553 | -4.00185 |
| C-C_3   | -1.86689 | -0.99785 | -5.0617  |
| C-C_R   | 3.07514  | 2.6779   | 4.05165  |
| H-H_    | 2.85195  | 3.70006  | 3.75272  |
| C-C_R   | 3.93708  | 2.42964  | 5.12919  |
| H-H_    | 4.38376  | 3.26294  | 5.66548  |
| C-C_R   | 4.22743  | 1.11779  | 5.51146  |
| H-H_    | 4.8994   | 0.93118  | 6.34515  |



|       |          |          |          |
|-------|----------|----------|----------|
| C-C_R | 3.65634  | 0.03797  | 4.82317  |
| H-H_  | 3.88349  | -0.98367 | 5.12065  |
| H-H_  | -2.76699 | -1.60603 | -5.18859 |
| H-H_  | -1.4332  | -0.87218 | -6.06293 |
| C-C_3 | -2.20926 | 0.37704  | -4.46652 |
| H-H_  | -2.99882 | 0.8163   | -5.09434 |
| H-H_  | -2.64053 | 0.25232  | -3.46482 |
| C-C_3 | -1.0243  | 1.35157  | -4.40389 |
| H-H_  | -0.58485 | 1.45238  | -5.40755 |
| H-H_  | -0.23424 | 0.94156  | -3.75781 |
| C-C_3 | -1.41946 | 2.73593  | -3.87473 |
| H-H_  | -2.17535 | 3.2038   | -4.51846 |
| H-H_  | -0.55467 | 3.40871  | -3.83383 |
| H-H_  | -1.83642 | 2.66743  | -2.86261 |
| H-H_  | -0.25476 | -1.79945 | -0.81431 |
| H-H_  | -5.18277 | -1.33619 | -0.53037 |
| C-C_3 | -3.94997 | -0.20728 | 1.61585  |
| H-H_  | -5.03569 | -0.34114 | 1.60218  |
| H-H_  | -3.73919 | 0.86865  | 1.60552  |
| H-H_  | -3.57282 | -0.61    | 2.56338  |
| H-H_  | 3.1666   | 0.67845  | -2.18067 |

**The cartesian coordinates for the optimized conformer at the B3LYP/6-31G+\* level:  
Balance 2 unfolded conformer**

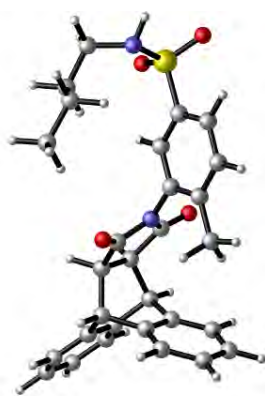

|       |          |         |          |
|-------|----------|---------|----------|
| C-C_R | -3.79856 | 2.6579  | 0.39431  |
| C-C_R | -3.30906 | 2.42857 | 1.69468  |
| C-C_3 | -3.34528 | 1.60867 | -0.61284 |

|         |          |          |          |
|---------|----------|----------|----------|
| H-H_    | -3.74057 | 1.77859  | -1.61726 |
| C-C_3   | -2.43649 | 1.18467  | 1.79735  |
| C-C_R   | -3.73018 | 0.24856  | -0.05432 |
| C-C_R   | -4.31831 | -2.13989 | 1.26672  |
| C-C_R   | -4.49682 | -0.72179 | -0.69692 |
| C-C_R   | -3.24456 | 0.02138  | 1.24636  |
| C-C_R   | -3.53399 | -1.17133 | 1.90698  |
| C-C_R   | -4.79411 | -1.91758 | -0.02869 |
| H-H_    | -4.86534 | -0.54786 | -1.70542 |
| H-H_    | -3.15818 | -1.34469 | 2.91296  |
| H-H_    | -5.39993 | -2.67368 | -0.52177 |
| C-C_3   | -1.77885 | 1.69677  | -0.61264 |
| H-H_    | -1.48853 | 2.68042  | -0.99762 |
| C-C_3   | -1.24089 | 1.44878  | 0.81596  |
| H-H_    | -0.66914 | 2.30177  | 1.19683  |
| C-C_R   | -1.09534 | 0.65004  | -1.48512 |
| C-C_R   | -0.27054 | 0.28138  | 0.68     |
| O-O_R   | -1.24376 | 0.47937  | -2.67578 |
| O-O_R   | 0.37793  | -0.23682 | 1.56707  |
| N-N_R   | -0.22021 | -0.09588 | -0.67086 |
| C-C_R   | 0.70722  | -1.06602 | -1.18397 |
| C-C_R   | 2.5861   | -2.86829 | -2.18177 |
| C-C_R   | 1.83545  | -0.58742 | -1.85239 |
| C-C_R   | 0.48756  | -2.44136 | -1.0018  |
| C-C_R   | 1.44947  | -3.32385 | -1.51904 |
| C-C_R   | 2.77272  | -1.49398 | -2.33761 |
| H-H_    | 1.97927  | 0.4777   | -1.99963 |
| H-H_    | 3.31348  | -3.56829 | -2.58064 |
| H-H_    | -2.06948 | 1.00008  | 2.81009  |
| C-C_3   | -0.72734 | -2.96408 | -0.28052 |
| H-H_    | -0.71725 | -2.66333 | 0.77325  |
| H-H_    | -0.75974 | -4.05698 | -0.32198 |
| H-H_    | -1.65371 | -2.58081 | -0.72161 |
| H-H_    | 1.29817  | -4.39346 | -1.39835 |
| S-S_3+4 | 4.24793  | -0.88457 | -3.16401 |
| O-O_2   | 4.04676  | 0.55127  | -3.40278 |
| O-O_2   | 4.57012  | -1.81542 | -4.25493 |
| N-N_3   | 5.48376  | -1.11247 | -2.02721 |

|       |          |          |          |
|-------|----------|----------|----------|
| H-H_  | 6.22822  | -1.61226 | -2.508   |
| C-C_3 | 5.94969  | 0.03064  | -1.2087  |
| C-C_R | -3.62268 | 3.30683  | 2.72812  |
| H-H_  | -3.24402 | 3.1297   | 3.73268  |
| C-C_R | -4.43504 | 4.4192   | 2.46539  |
| H-H_  | -4.68797 | 5.10433  | 3.27039  |
| C-C_R | -4.91981 | 4.64793  | 1.17559  |
| H-H_  | -5.54972 | 5.51126  | 0.97731  |
| C-C_R | -4.59975 | 3.76648  | 0.133    |
| H-H_  | -4.97697 | 3.94647  | -0.87155 |
| H-H_  | 5.93567  | 0.95392  | -1.80003 |
| H-H_  | 6.99563  | -0.1928  | -0.96674 |
| C-C_3 | 5.15253  | 0.21973  | 0.08564  |
| H-H_  | 5.53342  | 1.13164  | 0.56885  |
| H-H_  | 4.10143  | 0.42393  | -0.15824 |
| C-C_3 | 5.23591  | -0.95535 | 1.06852  |
| H-H_  | 6.29324  | -1.15478 | 1.30142  |
| H-H_  | 4.84941  | -1.86074 | 0.58427  |
| C-C_3 | 4.46548  | -0.69423 | 2.36884  |
| H-H_  | 4.85124  | 0.19479  | 2.88492  |
| H-H_  | 4.55293  | -1.54262 | 3.05822  |
| H-H_  | 3.39805  | -0.53253 | 2.17484  |
| H-H_  | -4.55665 | -3.06766 | 1.78017  |

## References

1. Gardarsson, H.; Schweizer, W. B.; Trapp, N.; Diederich, F., Structures and Properties of Molecular Torsion Balances to Decipher the Nature of Substituent Effects on the Aromatic Edge-to-Face Interaction. *Chemistry – A European Journal* **2014**, *20* (16), 4608-4616.

7.703  
7.699  
7.683  
7.679  
7.536  
7.532  
7.502  
7.497  
7.490  
7.482  
7.477  
7.469  
7.400  
7.395  
7.380  
7.375  
7.352  
7.332  
7.294  
7.272  
6.145  
6.141  
5.284  
5.272  
5.266  
5.254  
4.990  
4.986  
3.507  
3.503  
3.499  
3.022  
3.004  
2.992  
2.974  
2.956  
2.827  
2.810  
2.797  
2.780  
2.768  
2.750  
2.158  
1.630  
1.567  
1.530  
1.515  
1.499  
1.482  
1.466  
1.401  
1.383  
1.364  
1.346  
1.300  
0.944  
0.926  
0.908  
0.885

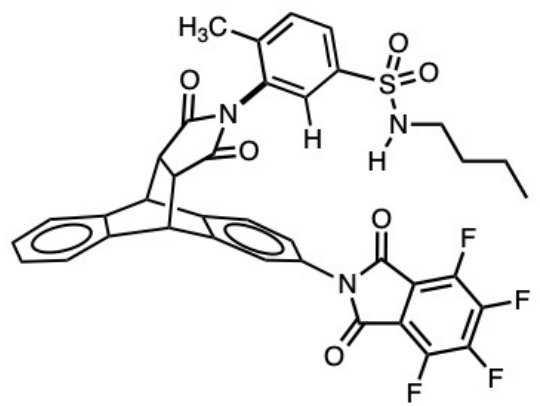

proton NMR, 400 MHz, CDCl<sub>3</sub>

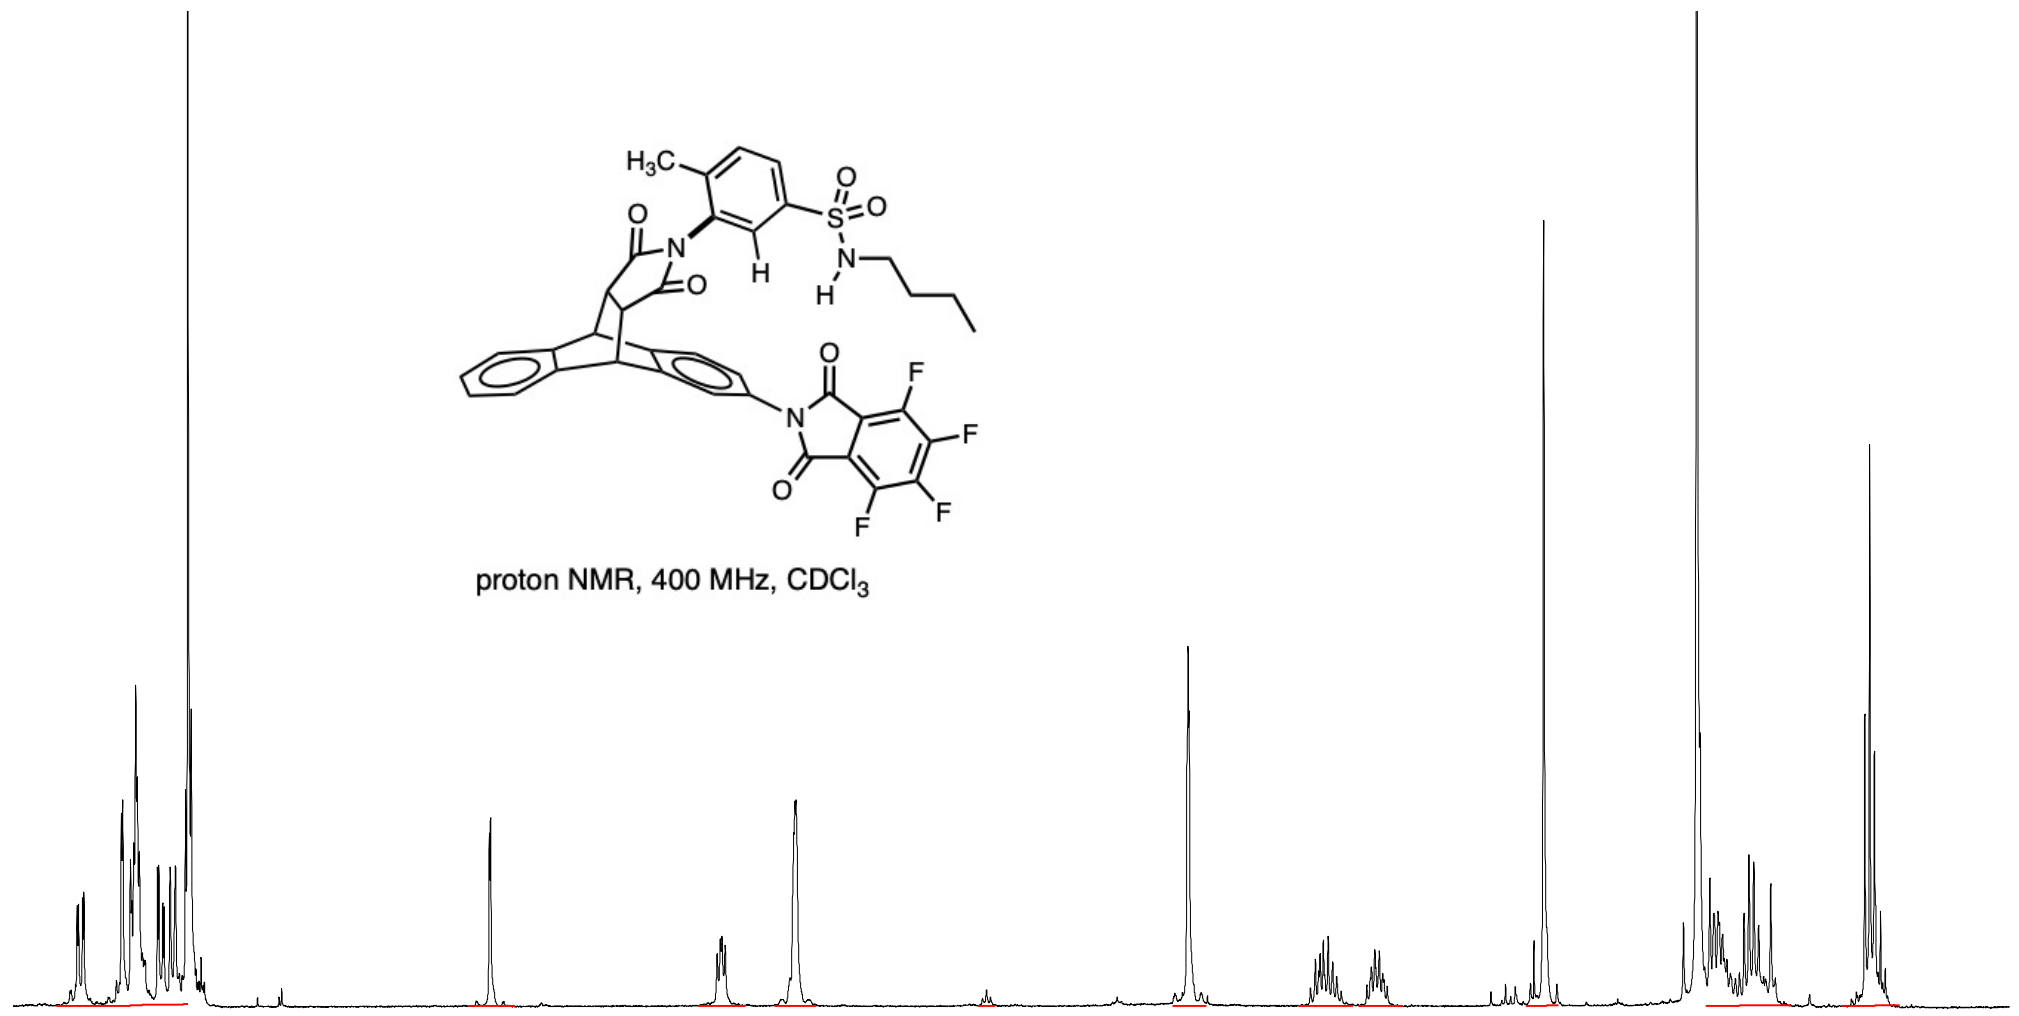

7.5  
7.0  
6.5  
6.0  
5.5  
5.0  
4.5  
4.0  
3.5  
3.0  
2.5  
2.0  
1.5  
1.0  
ppm

9.99  
0.83  
0.87  
2.00  
0.12  
2.09  
1.19  
0.86  
2.71  
4.81  
3.08

175.36  
174.88

162.25  
142.51  
140.67  
140.25  
140.20  
139.56  
139.26  
138.71  
131.56  
130.90  
129.29  
128.41  
127.68  
127.35  
127.27  
126.28  
126.16  
125.61  
124.63  
124.60  
122.82  
113.36

47.09  
47.07  
45.96  
45.59  
45.25  
45.06  
42.97  
31.58  
31.34

19.67  
17.95  
16.99  
13.57  
13.53

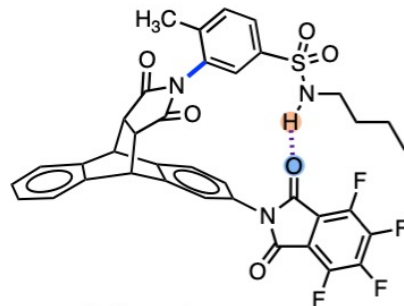

Balance 1  
carbon NMR (101 MHz, chloroform)

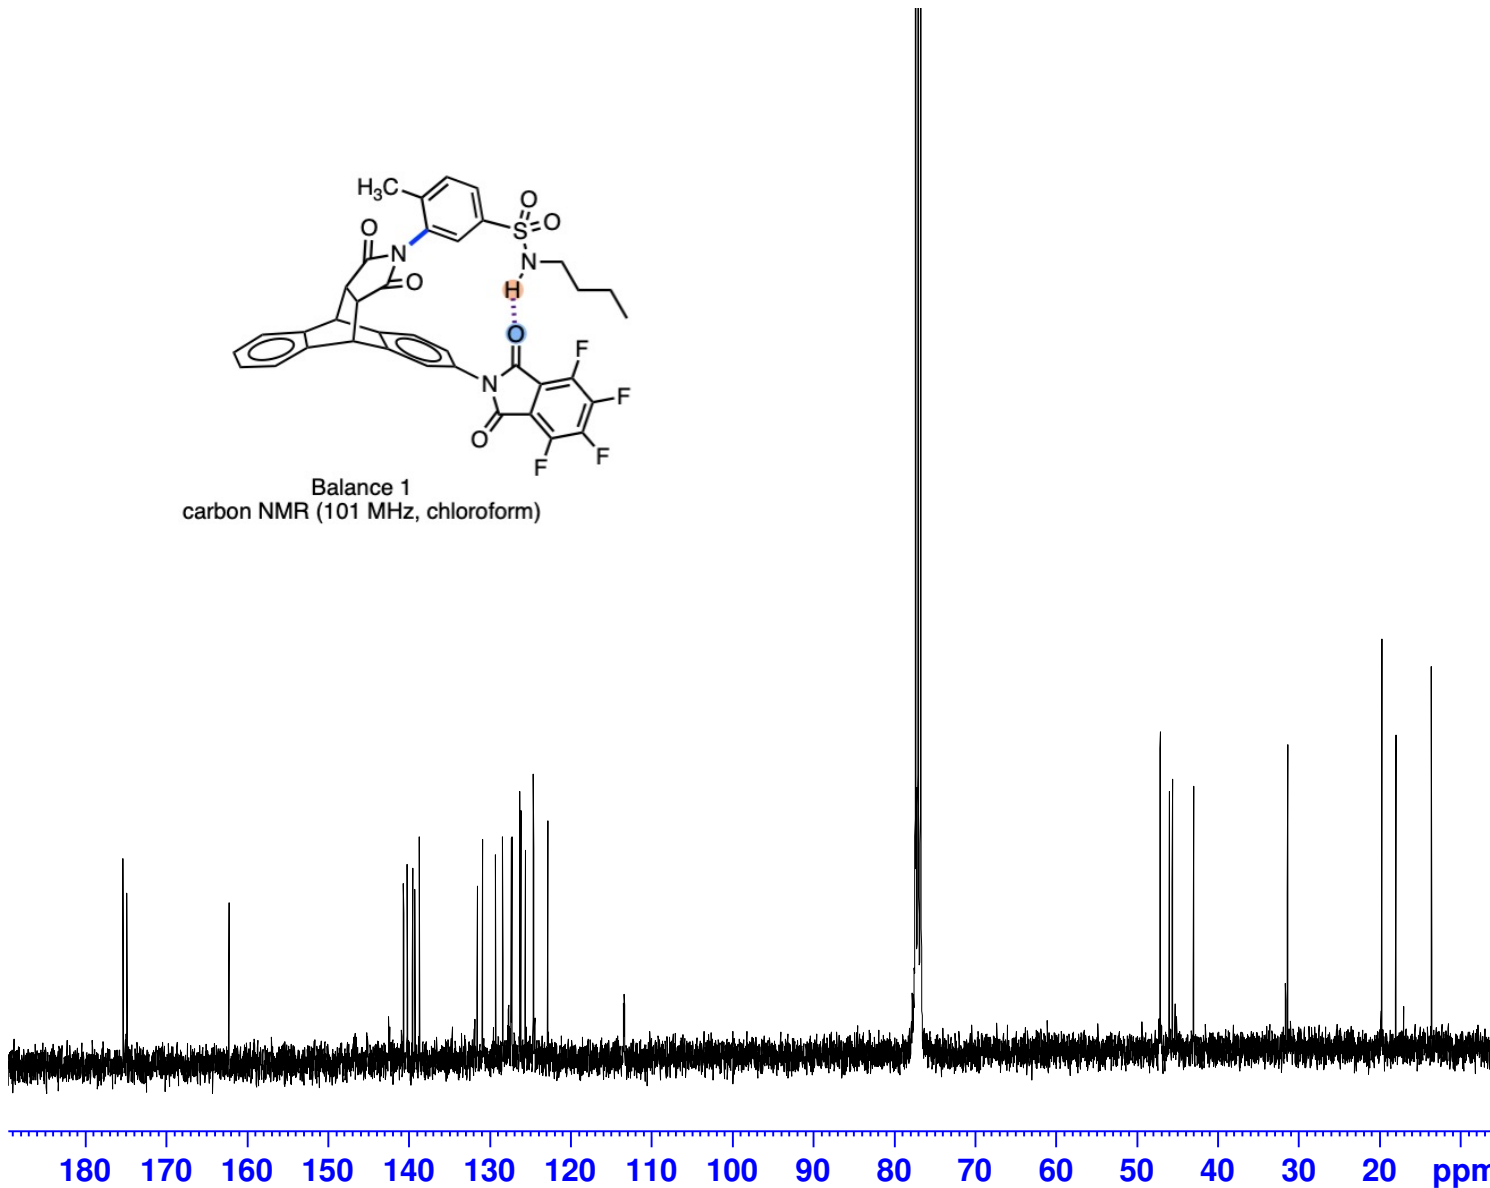

Current Data Parameters  
NAME controljan142023balanc  
EXPNO 1  
PROCNO 1

F2 - Acquisition Parameters  
Date\_ 20230114  
Time 19.48  
INSTRUM spect  
PROBHD 5 mm PABBO BB-  
PULPROG zgpg30  
TD 65536  
SOLVENT CDC13  
NS 2883  
DS 4  
SWH 24038.461 Hz  
FIDRES 0.366798 Hz  
AQ 1.3631488 sec  
RG 2050  
DW 20.800 usec  
DE 6.50 usec  
TE 300.0 K  
D1 2.0000000 sec  
D11 0.0300000 sec  
TD0 1

=====  
CHANNEL f1  
SFO1 100.6228293 MHz  
NUC1 13C  
P1 7.50 usec  
PLW1 75.0000000 W

=====  
CHANNEL f2  
SFO2 400.1316005 MHz  
NUC2 1H  
CPDPRG[2] waltz16  
PCPD2 90.00 usec  
PLW2 18.0000000 W  
PLW12 0.19220001 W  
PLW13 0.09667500 W

F2 - Processing parameters  
SI 32768  
SF 100.6127690 MHz  
WDW EM  
SSB 0  
LB 1.00 Hz  
GB 0  
PC 1.40

7.503  
7.450  
7.443  
7.435  
7.430  
7.422  
7.394  
7.385  
7.381  
7.372  
7.363  
7.354  
7.344  
7.286  
7.273  
7.260  
7.252  
7.246  
7.238  
7.231  
7.223  
7.217  
7.209  
7.194  
7.185  
7.180  
7.172  
4.921  
3.460  
3.454  
3.451  
3.446  
2.931  
2.914  
2.897  
2.150  
1.681  
1.149  
0.954  
0.936  
0.918  
0.893  
0.874  
0.856

Current Data Parameters  
NAME controljan142023proton  
EXPNO 1  
PROCNO 1

F2 - Acquisition Parameters  
Date\_ 20230114  
Time 15.40  
INSTRUM spect  
PROBHD 5 mm PABBO BB-  
PULPROG zg30  
TD 65536  
SOLVENT CDCl3  
NS 16  
DS 2  
SWH 8012.820 Hz  
FIDRES 0.122266 Hz  
AQ 4.0894465 sec  
RG 144  
DW 62.400 usec  
DE 6.50 usec  
TE 298.0 K  
D1 1.00000000 sec  
TD0 1

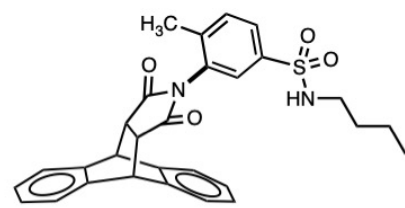

Balance 2 (control)  
proton NMR (400 MHz, chloroform)

===== CHANNEL f1 =====  
SFO1 400.1324710 MHz  
NUC1 1H  
P1 9.30 usec  
PLW1 18.00000000 W

F2 - Processing parameters  
SI 65536  
SF 400.1300000 MHz  
WDW EM  
SSB 0  
LB 0.30 Hz  
GB 0  
PC 1.00

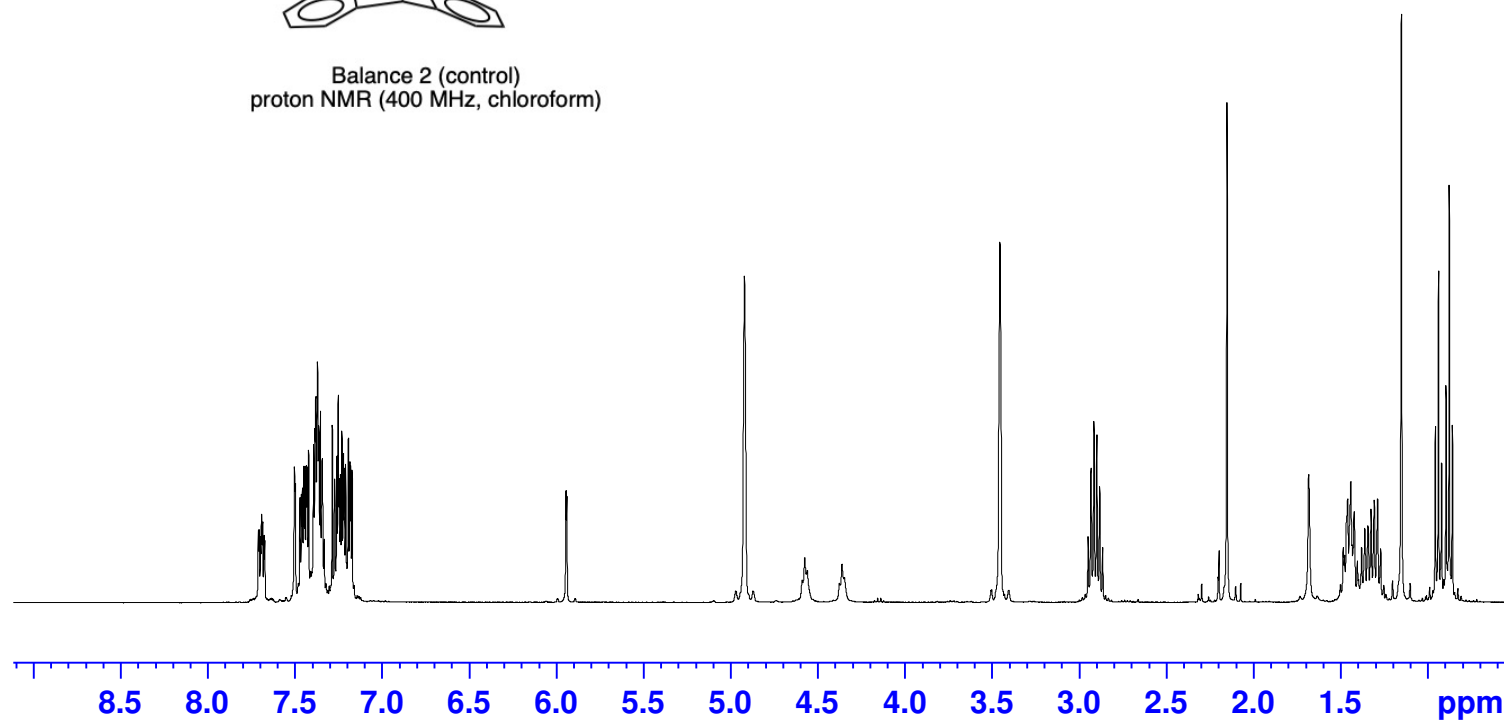

10.95  
0.43  
2.00  
0.54  
0.44  
2.00  
1.99  
1.44  
4.25  
1.71  
3.16

175.63  
175.52

141.77  
141.68  
141.06  
141.02  
139.31  
138.60  
138.57  
138.32  
131.69  
131.53  
131.33  
127.62  
127.40  
127.11  
126.98  
126.89  
126.77  
125.48  
125.23  
124.43  
124.31

47.33  
47.28  
45.96  
45.34  
43.01

31.61  
31.54

19.76  
19.68  
17.90  
16.68  
13.61  
13.55

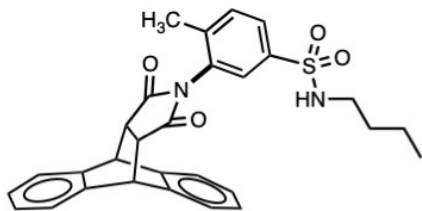

Balance 2 (control)  
carbon NMR (101 MHz, chloroform)

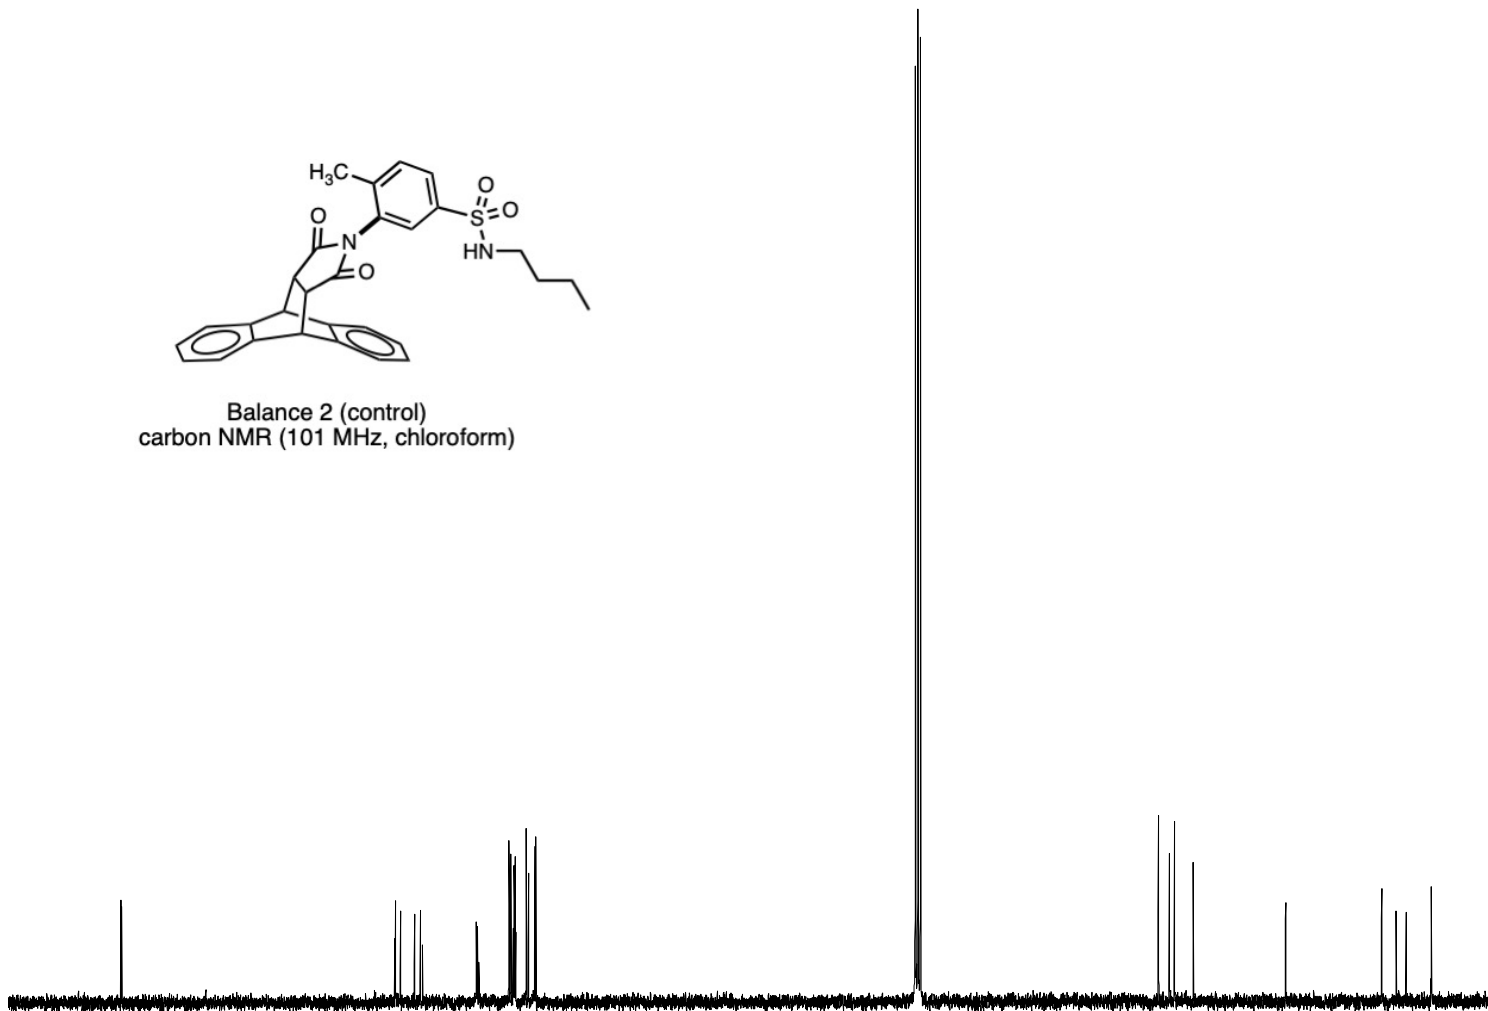

Current Data Parameters  
NAME controljan142023carbon  
EXPNO 1  
PROCNO 1

F2 - Acquisition Parameters  
Date\_ 20230114  
Time 16.04  
INSTRUM spect  
PROBHD 5 mm PABBO BB-  
PULPROG zgpg30  
TD 65536  
SOLVENT CDC13  
NS 383  
DS 4  
SWH 24038.461 Hz  
FIDRES 0.366798 Hz  
AQ 1.3631488 sec  
RG 2050  
DW 20.800 usec  
DE 6.50 usec  
TE 300.0 K  
D1 2.00000000 sec  
D11 0.03000000 sec  
TDO 1

==== CHANNEL f1 =====  
SFO1 100.6228293 MHz  
NUC1 13C  
P1 7.50 usec  
PLW1 75.00000000 W

==== CHANNEL f2 =====  
SFO2 400.1316005 MHz  
NUC2 1H  
CPDPRG[2] waltz16  
PCPD2 90.00 usec  
PLW2 18.00000000 W  
PLW12 0.19220001 W  
PLW13 0.09667500 W

F2 - Processing parameters  
SI 32768  
SF 100.6127690 MHz  
WDW EM  
SSB 0  
LB 1.00 Hz  
GB 0  
PC 1.40

180 170 160 150 140 130 120 110 100 90 80 70 60 50 40 30 20 ppm

8.472  
8.437  
8.403

8.035  
8.016

7.569  
7.528  
7.506  
7.501  
7.481  
7.463  
7.445  
7.431

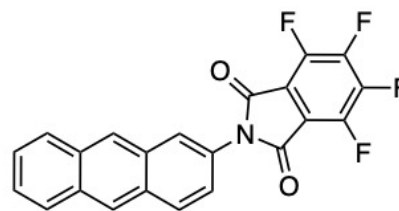

6

proton NMR (400 MHz, DMSO-d6)

Current Data Parameters  
NAME controljan1162023balance1PROTON  
EXPNO 1  
PROCNO 1

F2 - Acquisition Parameters  
Date\_ 20230116  
Time 16.36  
INSTRUM spect  
PROBHD 5 mm PABBO BB-  
PULPROG zg30  
TD 65536  
SOLVENT DMSO  
NS 16  
DS 2  
SWH 8012.820 Hz  
FIDRES 0.122266 Hz  
AQ 4.0894465 sec  
RG 32  
DW 62.400 usec  
DE 6.50 usec  
TE 298.0 K  
D1 1.00000000 sec  
TD0 1

===== CHANNEL f1 =====  
SFO1 400.1324710 MHz  
NUC1 1H  
P1 9.30 usec  
PLW1 18.00000000 W

F2 - Processing parameters  
SI 65536  
SF 400.1300000 MHz  
WDW EM  
SSB 0  
LB 0.30 Hz  
GB 0  
PC 1.00

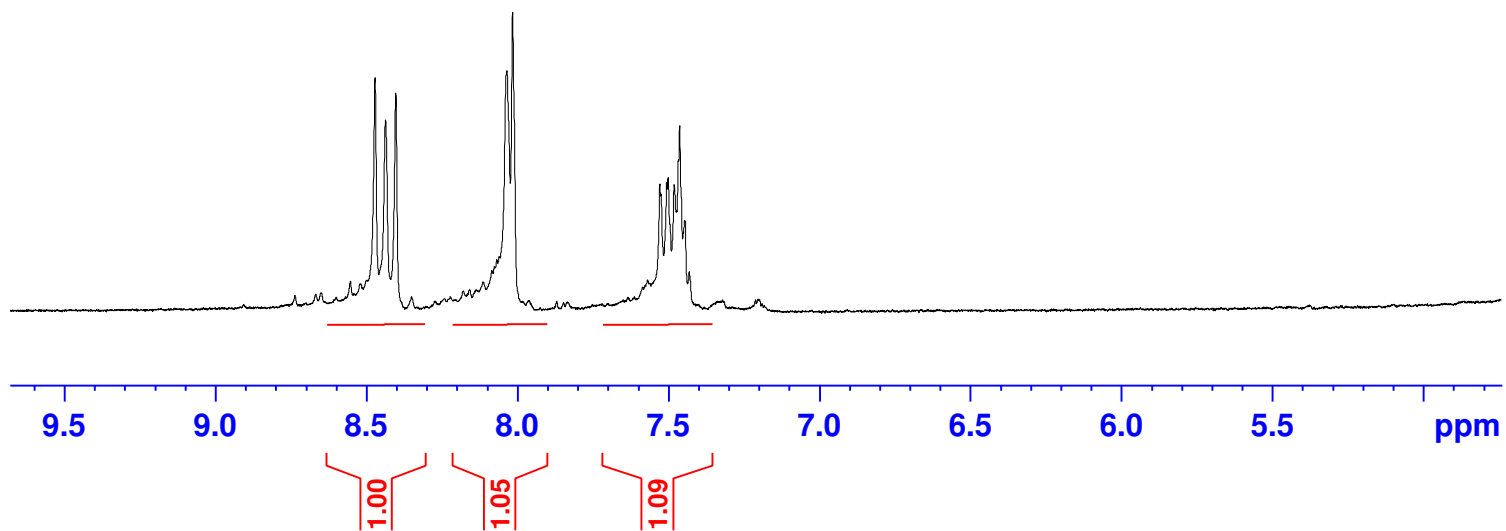



169.88

136.40  
132.12  
131.99  
130.85  
129.31  
128.93  
128.50  
128.13  
126.31  
126.21  
125.53  
125.38  
121.39

114.41

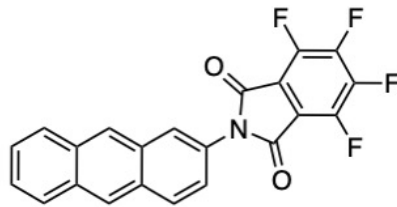

6

Carbon NMR (101 MHz, DMSO-d6)

Current Data Parameters  
NAME controljan1162023balance1CARBON  
EXPNO 1  
PROCNO 1

F2 - Acquisition Parameters  
Date\_ 20230116  
Time 19.18  
INSTRUM spect  
PROBHD 5 mm PABBO BB-  
PULPROG zgpg30  
TD 65536  
SOLVENT DMSO  
NS 2782  
DS 4  
SWH 24038.461 Hz  
FIDRES 0.366798 Hz  
AQ 1.3631488 sec  
RG 2050  
DW 20.800 usec  
DE 6.50 usec  
TE 300.0 K  
D1 2.00000000 sec  
D11 0.03000000 sec  
TD0 1

===== CHANNEL f1 =====  
SFO1 100.6228293 MHz  
NUC1 13C  
P1 7.50 usec  
PLW1 75.00000000 W

===== CHANNEL f2 =====  
SFO2 400.1316005 MHz  
NUC2 1H  
CPDPRG[2] waltz16  
PCPD2 90.00 usec  
PLW2 18.00000000 W  
PLW12 0.19220001 W  
PLW13 0.09667500 W

F2 - Processing parameters  
SI 32768  
SF 100.6127690 MHz  
WDW EM  
SSB 0  
LB 1.00 Hz  
GB 0  
PC 1.40

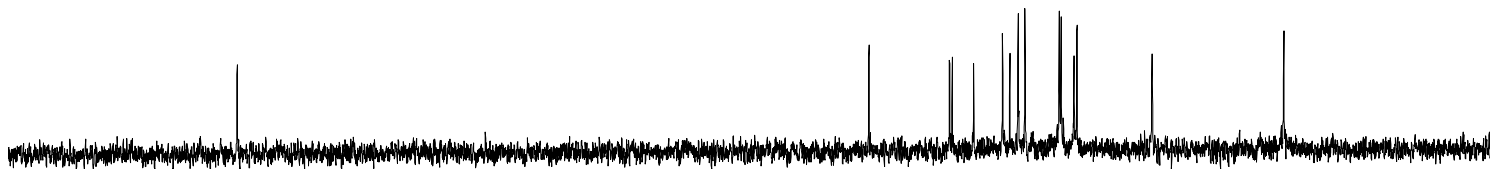

180 175 170 165 160 155 150 145 140 135 130 125 120 115 110 ppm

7.837  
7.832  
7.817  
7.812  
7.662  
7.658  
7.499  
7.479  
6.917

4.809  
4.794  
4.779

3.000  
2.983  
2.967  
2.950  
2.248  
1.499  
1.482  
1.474  
1.463  
1.456  
1.444  
1.426  
1.355  
1.337  
1.318

Current Data Parameters  
NAME controljan142023proton2  
EXPNO 1  
PROCNO 1

F2 - Acquisition Parameters  
Date\_ 20230114  
Time 16.14  
INSTRUM spect  
PROBHD 5 mm PABBO BB-  
PULPROG zg30  
TD 65536  
SOLVENT CDC13  
NS 16  
DS 2  
SWH 8012.820 Hz  
FIDRES 0.122266 Hz  
AQ 4.0894465 sec  
RG 114  
DW 62.400 usec  
DE 6.50 usec  
TE 298.0 K  
D1 1.00000000 sec  
TD0 1

==== CHANNEL f1 =====  
SFO1 400.1324710 MHz  
NUC1 1H  
P1 9.30 usec  
PLW1 18.00000000 W

F2 - Processing parameters  
SI 65536  
SF 400.1300000 MHz  
WDW EM  
SSB 0  
LB 0.30 Hz  
GB 0  
PC 1.00

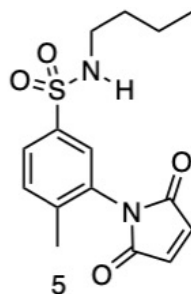

<sup>1</sup>H NMR (400 MHz, chloroform-d)

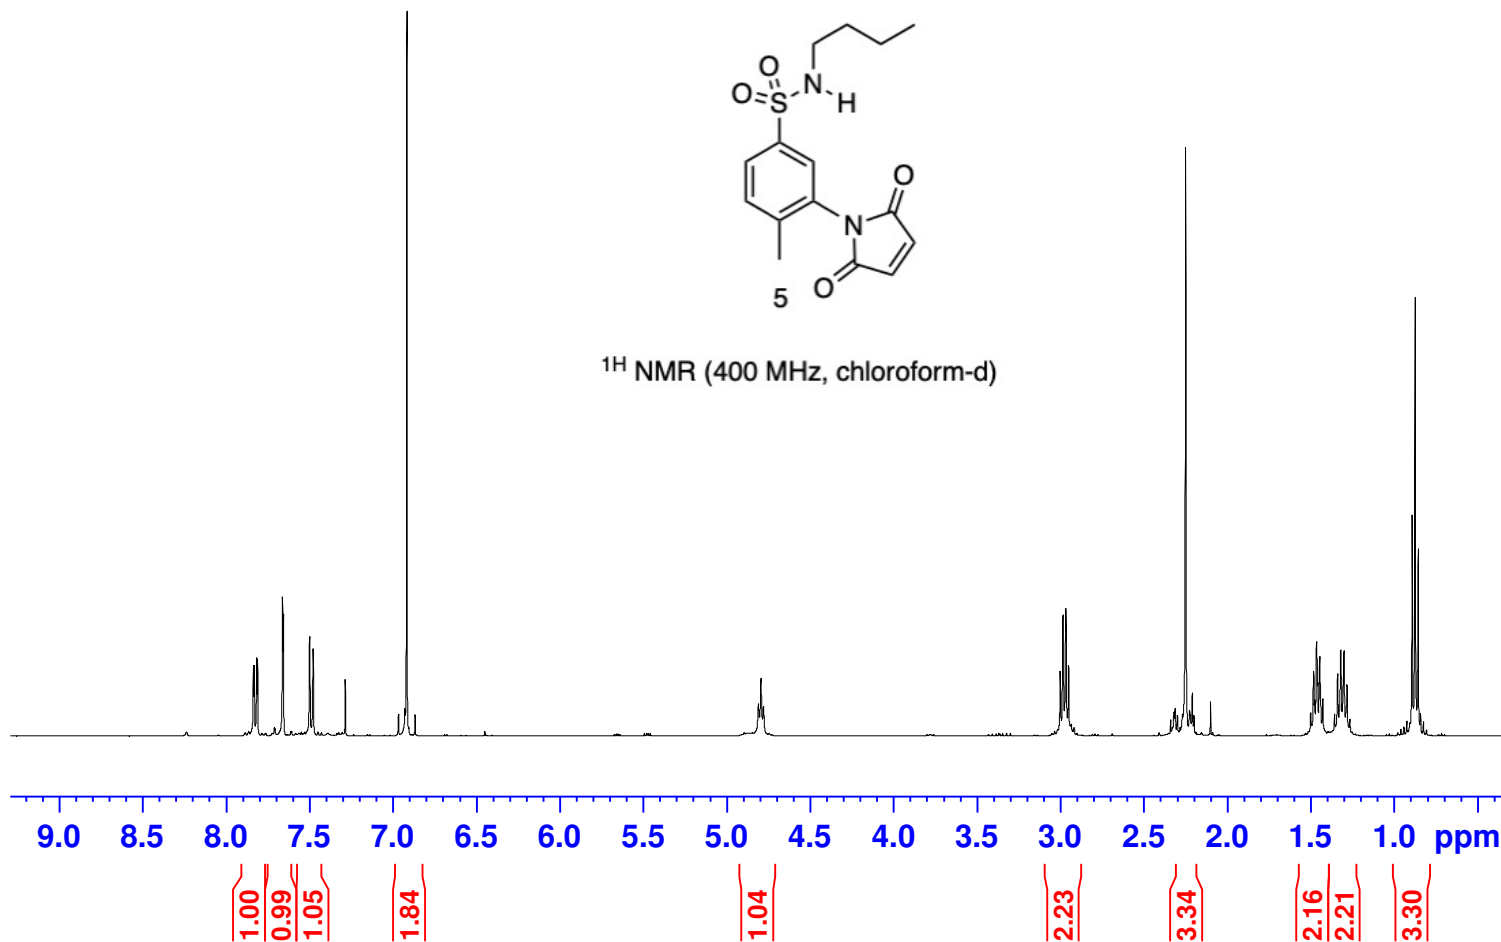

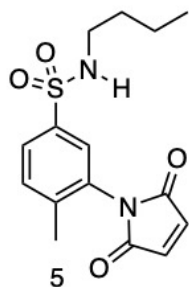

carbon NMR (101 MHz, chloroform-d)

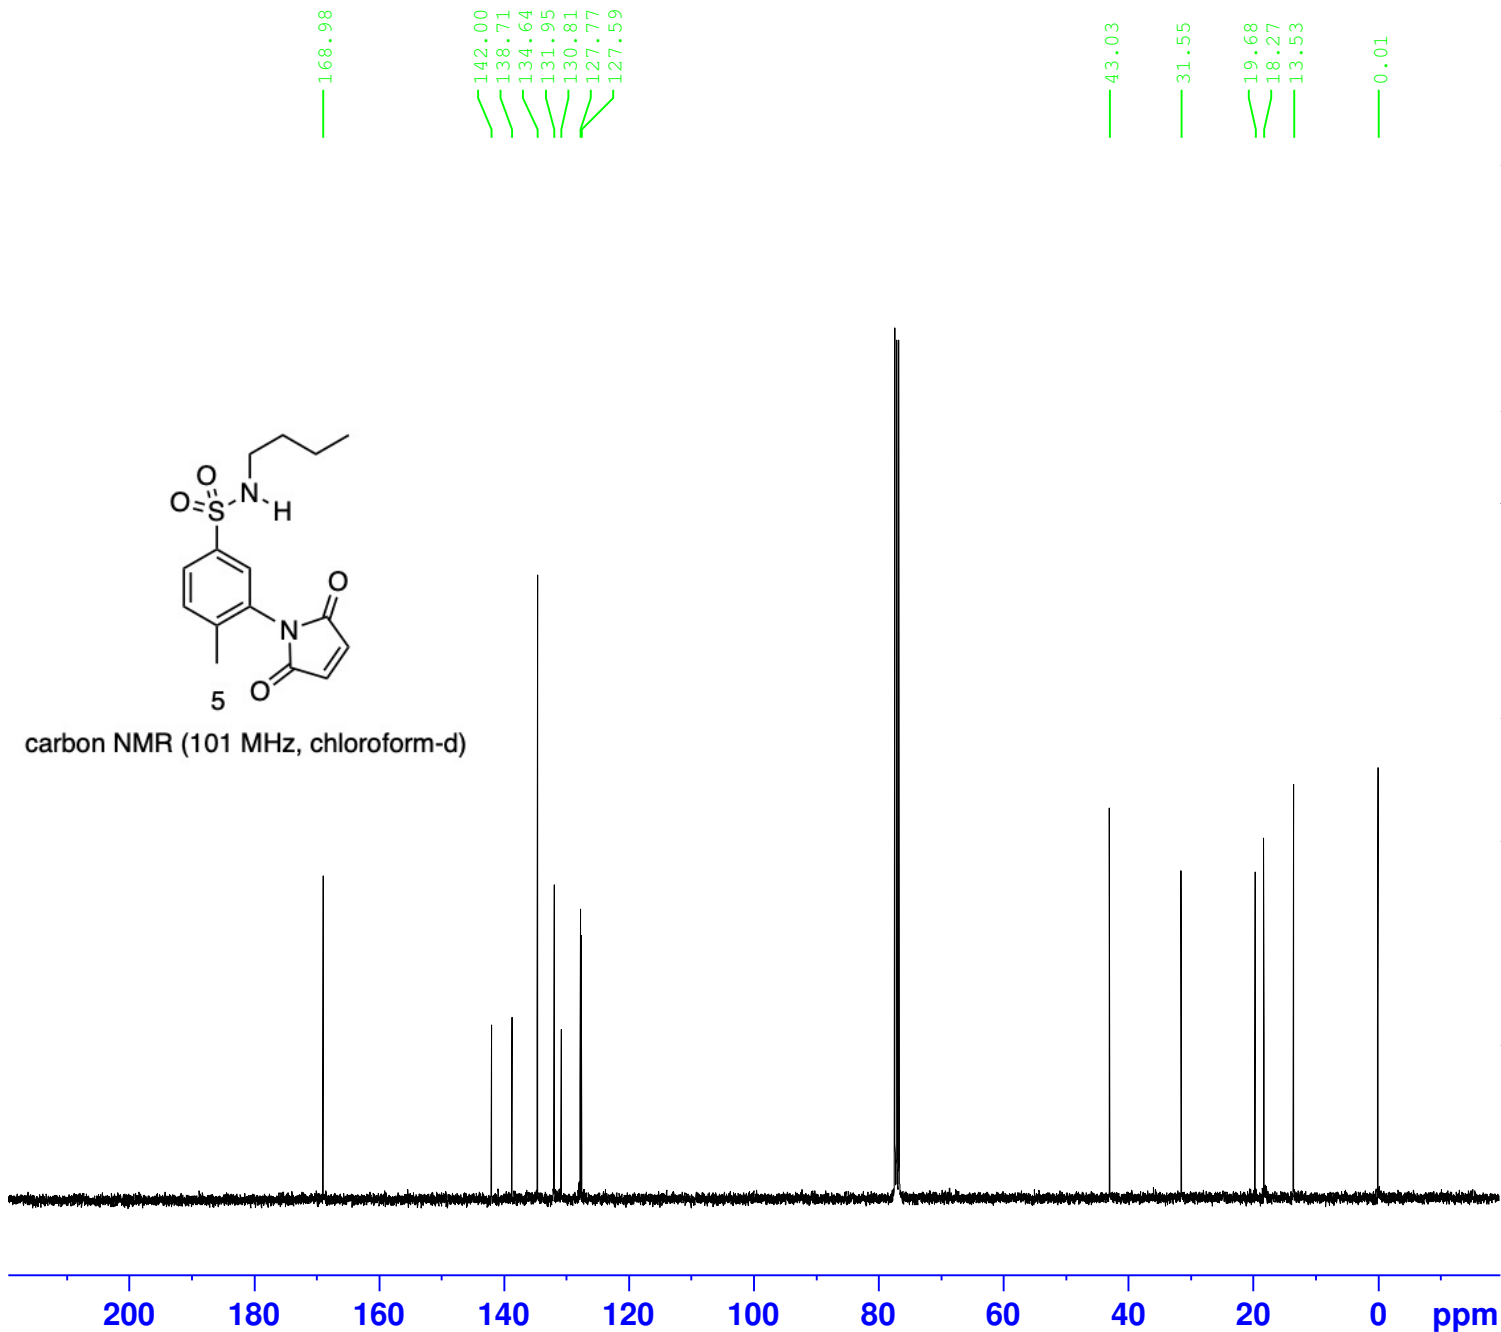

Current Data Parameters  
 NAME controljan142023carbon2  
 EXPNO 1  
 PROCNO 1

F2 - Acquisition Parameters  
 Date\_ 20230114  
 Time 16.50  
 INSTRUM spect  
 PROBHD 5 mm PABBO BB-  
 PULPROG zgpg30  
 TD 65536  
 SOLVENT CDCl3  
 NS 561  
 DS 4  
 SWH 24038.461 Hz  
 FIDRES 0.366798 Hz  
 AQ 1.3631488 sec  
 RG 2050  
 DW 20.800 usec  
 DE 6.50 usec  
 TE 300.0 K  
 D1 2.00000000 sec  
 D11 0.03000000 sec  
 TD0 1

===== CHANNEL f1 =====  
 SFO1 100.6228293 MHz  
 NUC1 13C  
 P1 7.50 usec  
 PLW1 75.00000000 W

===== CHANNEL f2 =====  
 SFO2 400.1316005 MHz  
 NUC2 1H  
 CPDPRG[2] waltz16  
 PCPD2 90.00 usec  
 PLW2 18.00000000 W  
 PLW12 0.19220001 W  
 PLW13 0.09667500 W

F2 - Processing parameters  
 SI 32768  
 SF 100.6127690 MHz  
 WDW EM  
 SSB 0  
 LB 1.00 Hz  
 GB 0  
 PC 1.40

145.48  
137.94  
130.78  
127.07  
116.64  
112.59

42.99  
31.50  
19.72  
17.47  
13.56

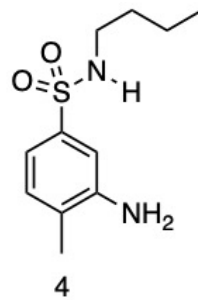

carbon NMR (101 MHz, chloroform-d)

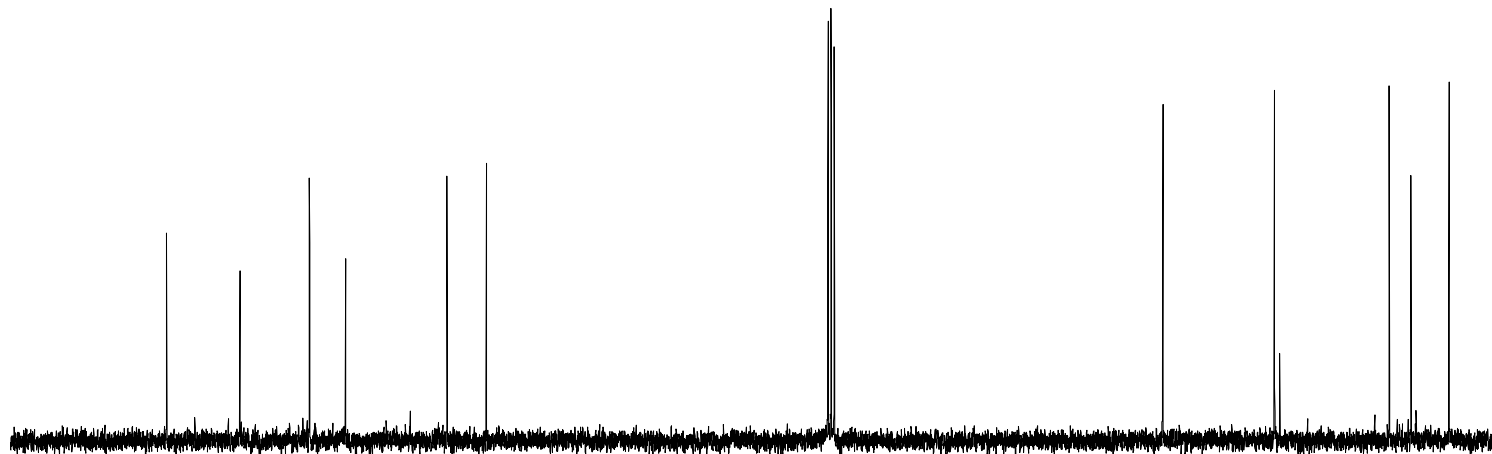

150 140 130 120 110 100 90 80 70 60 50 40 30 20 ppm

```
Current Data Parameters
NAME      N-butyl(3-methyl-4-amino)benzenesulfanamide-carbon
EXPNO     1
PROCNO    1

F2 - Acquisition Parameters
Date_     20230124
Time      19.37
INSTRUM   spect
PROBHD    5 mm PABBO BB-
PULPROG   zgpg30
TD         65536
SOLVENT   CDCl3
NS         25
DS         4
SWH        24038.461 Hz
FIDRES     0.366798 Hz
AQ         1.3631488 sec
RG         2050
DW         20.800 usec
DE         6.50 usec
TE         300.0 K
D1         2.00000000 sec
D11        0.03000000 sec
TD0        1

----- CHANNEL f1 -----
SFO1      100.6228293 MHz
NUC1       13C
P1         7.50 usec
PLW1       75.00000000 W

----- CHANNEL f2 -----
SFO2      400.1316005 MHz
NUC2       1H
CPDPRG2    waltz16
PCPD2      90.00 usec
PLW2       18.00000000 W
PLW12      0.19220001 W
PLW13      0.09667500 W

F2 - Processing parameters
SI         32768
SF         100.6127690 MHz
WDW        EM
SSB        0
LB         1.00 Hz
GB         0
PC         1.40
```

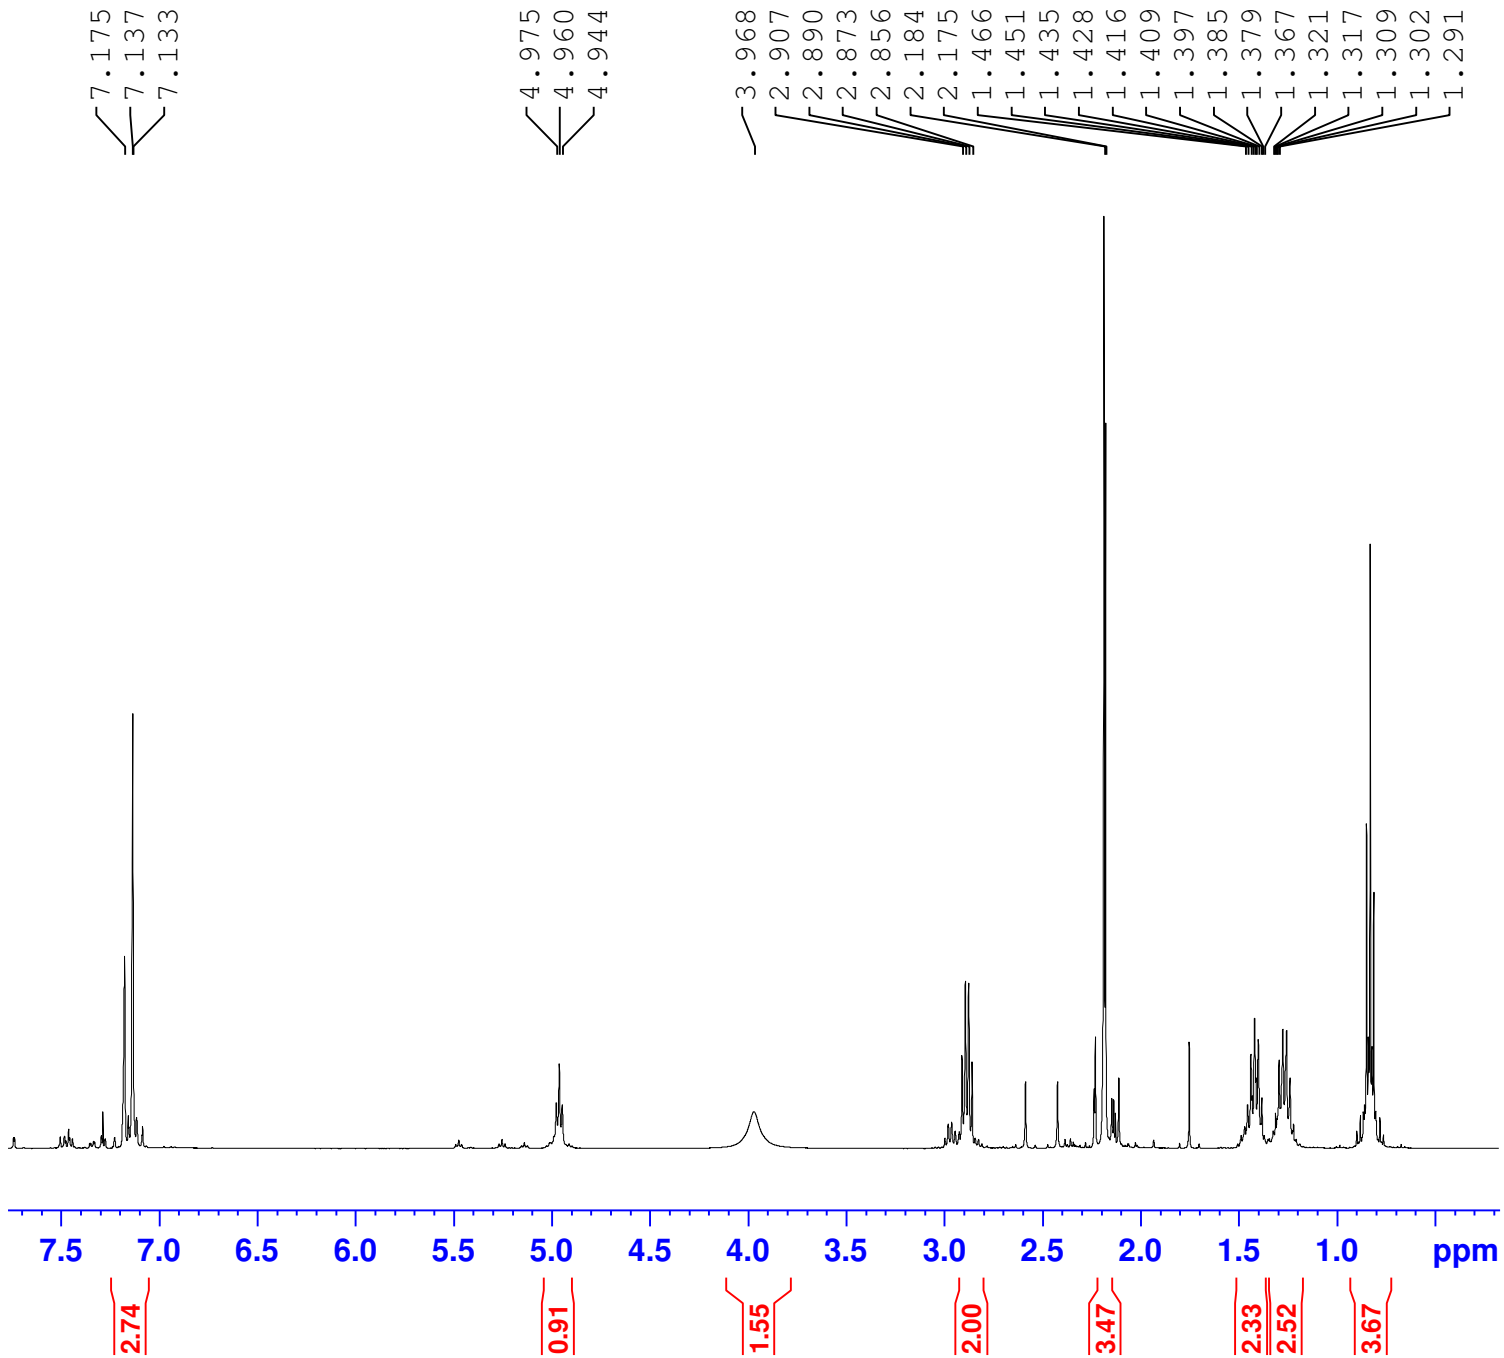

```

Current Data Parameters
NAME      N-butyl(3-methyl-4-amino)benzenesulfanamide-prot
EXPNO     1
PROCNO    1

F2 - Acquisition Parameters
Date_     20230124
Time      19.34
INSTRUM   spect
PROBHD    5 mm PABBO BB-
PULPROG   zg30
TD         65536
SOLVENT   CDC13
NS         7
DS         2
SWH        8012.820 Hz
FIDRES     0.122266 Hz
AQ         4.0894465 sec
RG         71.8
DW         62.400 usec
DE         6.50 usec
TE         298.0 K
D1         1.00000000 sec
TDO        1

----- CHANNEL f1 -----
SFO1      400.1324710 MHz
NUC1      1H
P1         9.30 usec
PLW1      18.00000000 W

F2 - Processing parameters
SI         65536
SF         400.1300000 MHz
WCM        EM
SSB        0
LB         0.30 Hz
GB         0
PC         1.00
  
```

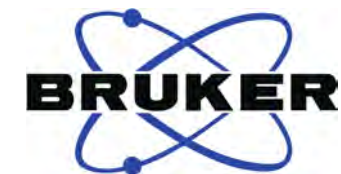

Current Data Parameters  
NAME conc-study-9.9mMOLAR-toluene  
EXPNO 1  
PROCNO 1

F2 - Acquisition Parameters  
Date\_ 20211013  
Time 18.38  
INSTRUM spect  
PROBHD 5 mm PABBO BB-  
PULPROG zg30  
TD 65536  
SOLVENT Tol  
NS 800  
DS 2  
SWH 8012.820 Hz  
FIDRES 0.122266 Hz  
AQ 4.0894465 sec  
RG 512  
DW 62.400 usec  
DE 6.50 usec  
TE 298.0 K  
D1 1.00000000 sec  
TD0 1

==== CHANNEL f1 =====  
SFO1 400.1324710 MHz  
NUC1 1H  
P1 9.30 usec  
PLW1 18.00000000 W

F2 - Processing parameters  
SI 65536  
SF 400.1299439 MHz  
WDW EM  
SSB 0  
LB 0.30 Hz  
GB 0  
PC 1.00

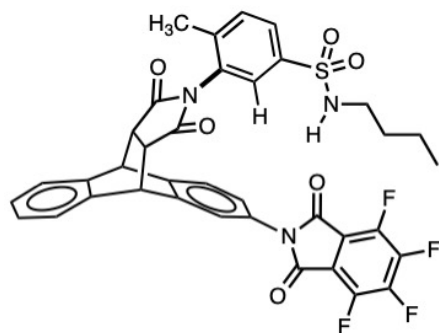

proton NMR, 400 MHz, toluene-d8  
average folding = 84%

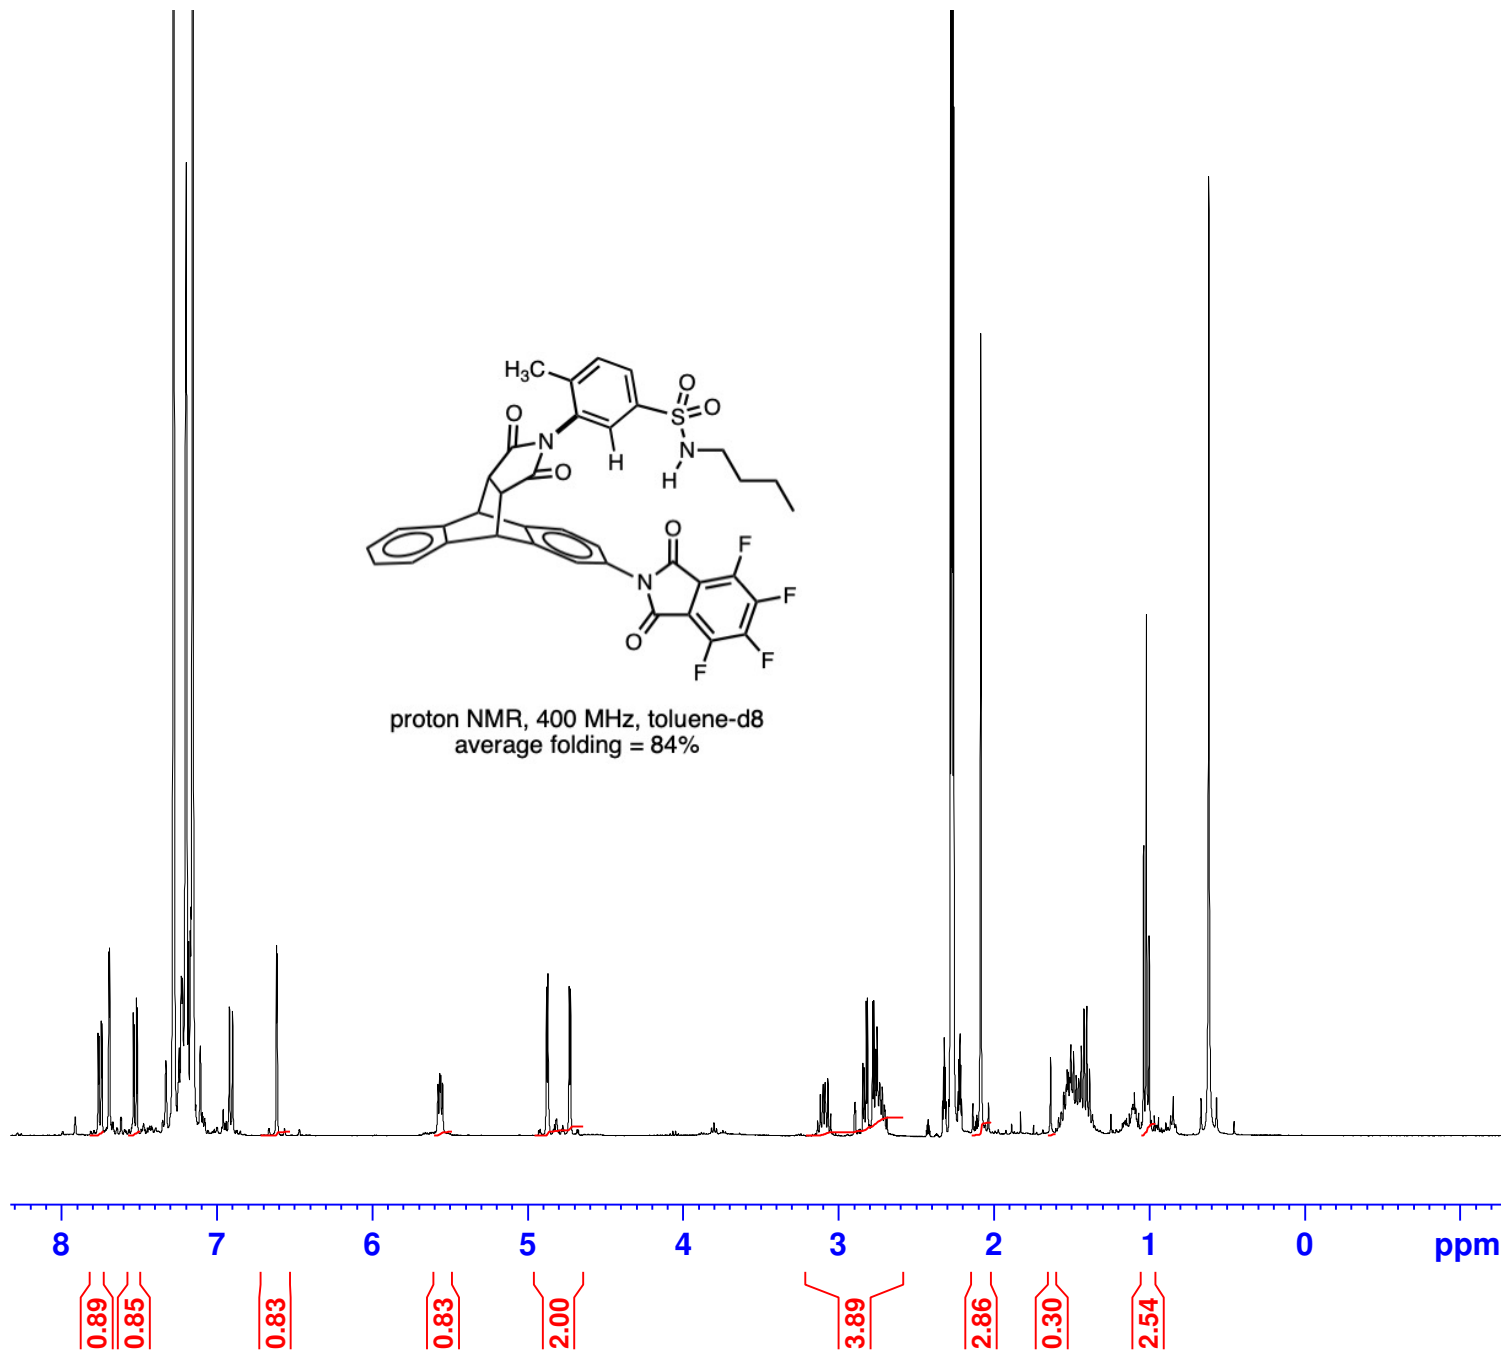

7.502  
7.471  
7.451  
7.442  
7.419  
7.405  
7.397  
7.376  
7.370  
7.308  
7.288  
7.195  
7.175  
7.164  
7.153  
7.129  
6.062

4.922  
4.883

3.525  
3.484  
2.835  
2.818  
2.804  
2.786  
2.768  
2.750  
2.733  
2.720  
2.703  
2.689  
2.088

0.862  
0.844  
0.826  
0.814  
0.796

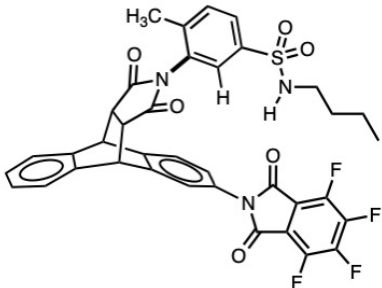

proton NMR, 400 MHz, *tert*-butanol-*d*<sub>10</sub>  
average folding = 65%

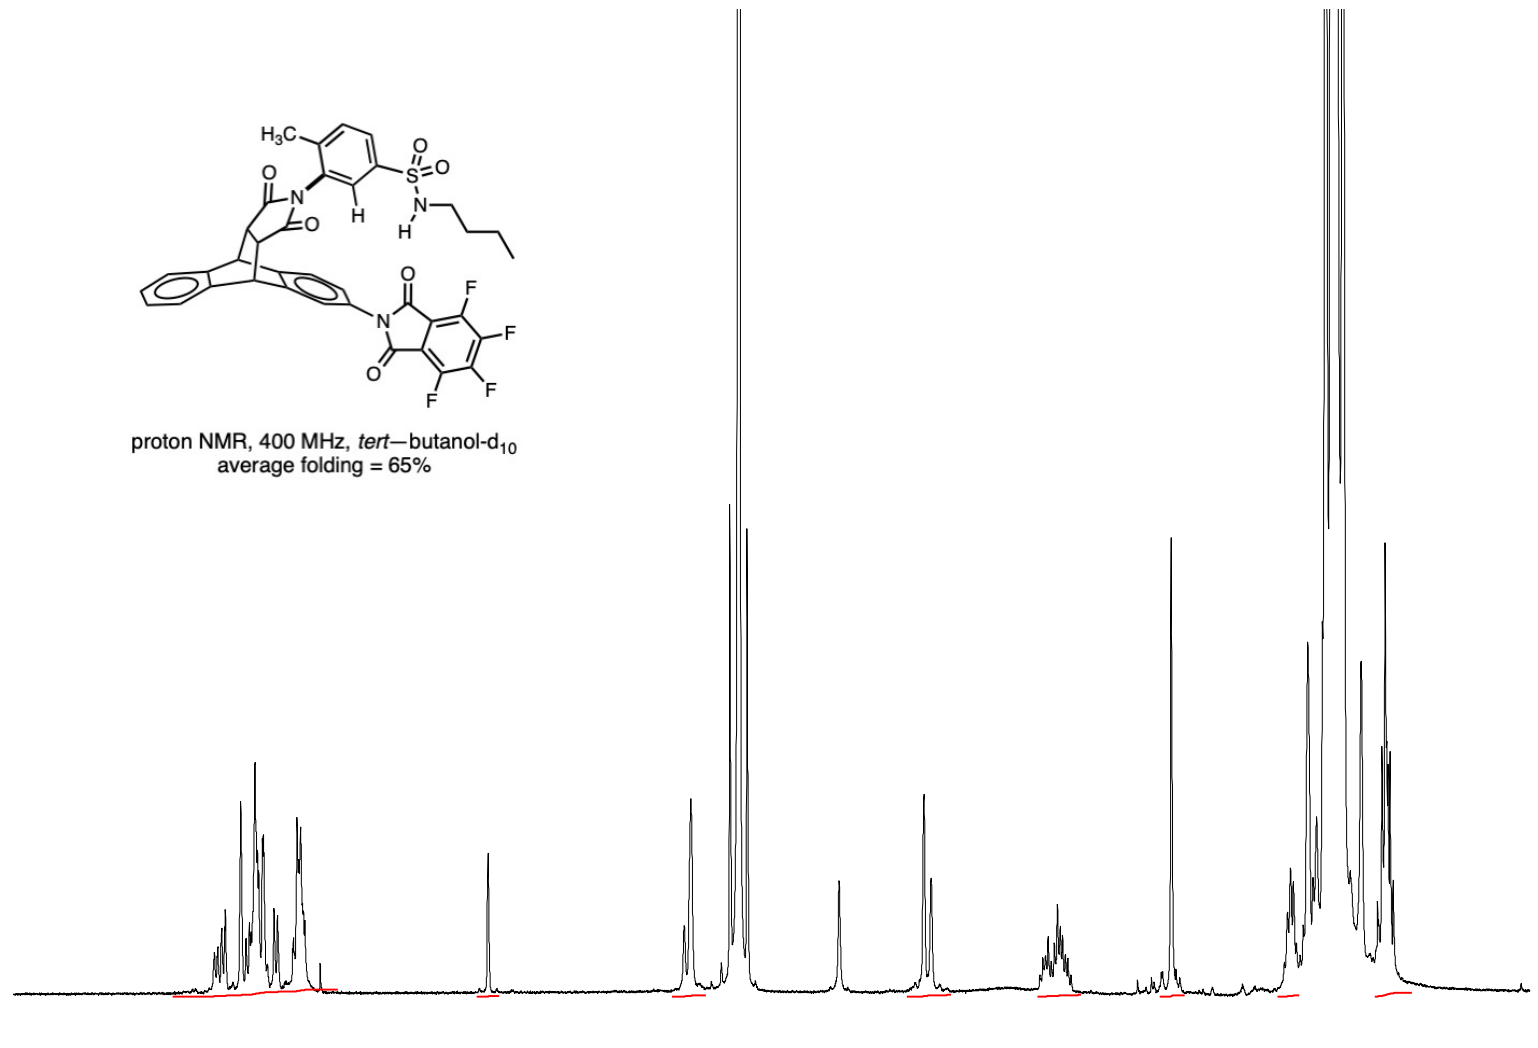

8.5 8.0 7.5 7.0 6.5 6.0 5.5 5.0 4.5 4.0 3.5 3.0 2.5 2.0 1.5 1.0 ppm

9.15 0.65 2.00 2.06 2.03 1.85 1.87 5.19

```

Current Data Parameters
NAME      conc-study~9.9mMOLAR-tertbutanol1
EXPNO     1
PROCNO    1

F2 - Acquisition Parameters
Date_     20221107
Time      15.19
INSTRUM   spect
PROBHD    5 mm PABBO BB-
PULPROG   zg30
TD         65536
SOLVENT   EtOH
NS         320
DS         2
SWH        8012.820 Hz
FIDRES     0.122266 Hz
AQ         4.0894465 sec
RG         256
DW         62.400 usec
DE         6.50 usec
TE         298.0 K
D1         1.00000000 sec
TDO        1

===== CHANNEL f1 =====
SFO1      400.1324710 MHz
NUC1       1H
P1         9.30 usec
PLW1      18.00000000 W

F2 - Processing parameters
SI         65536
SF         400.1300000 MHz
WDW        EM
SSB        0
LB         0.30 Hz
GB         0
PC         1.00
  
```

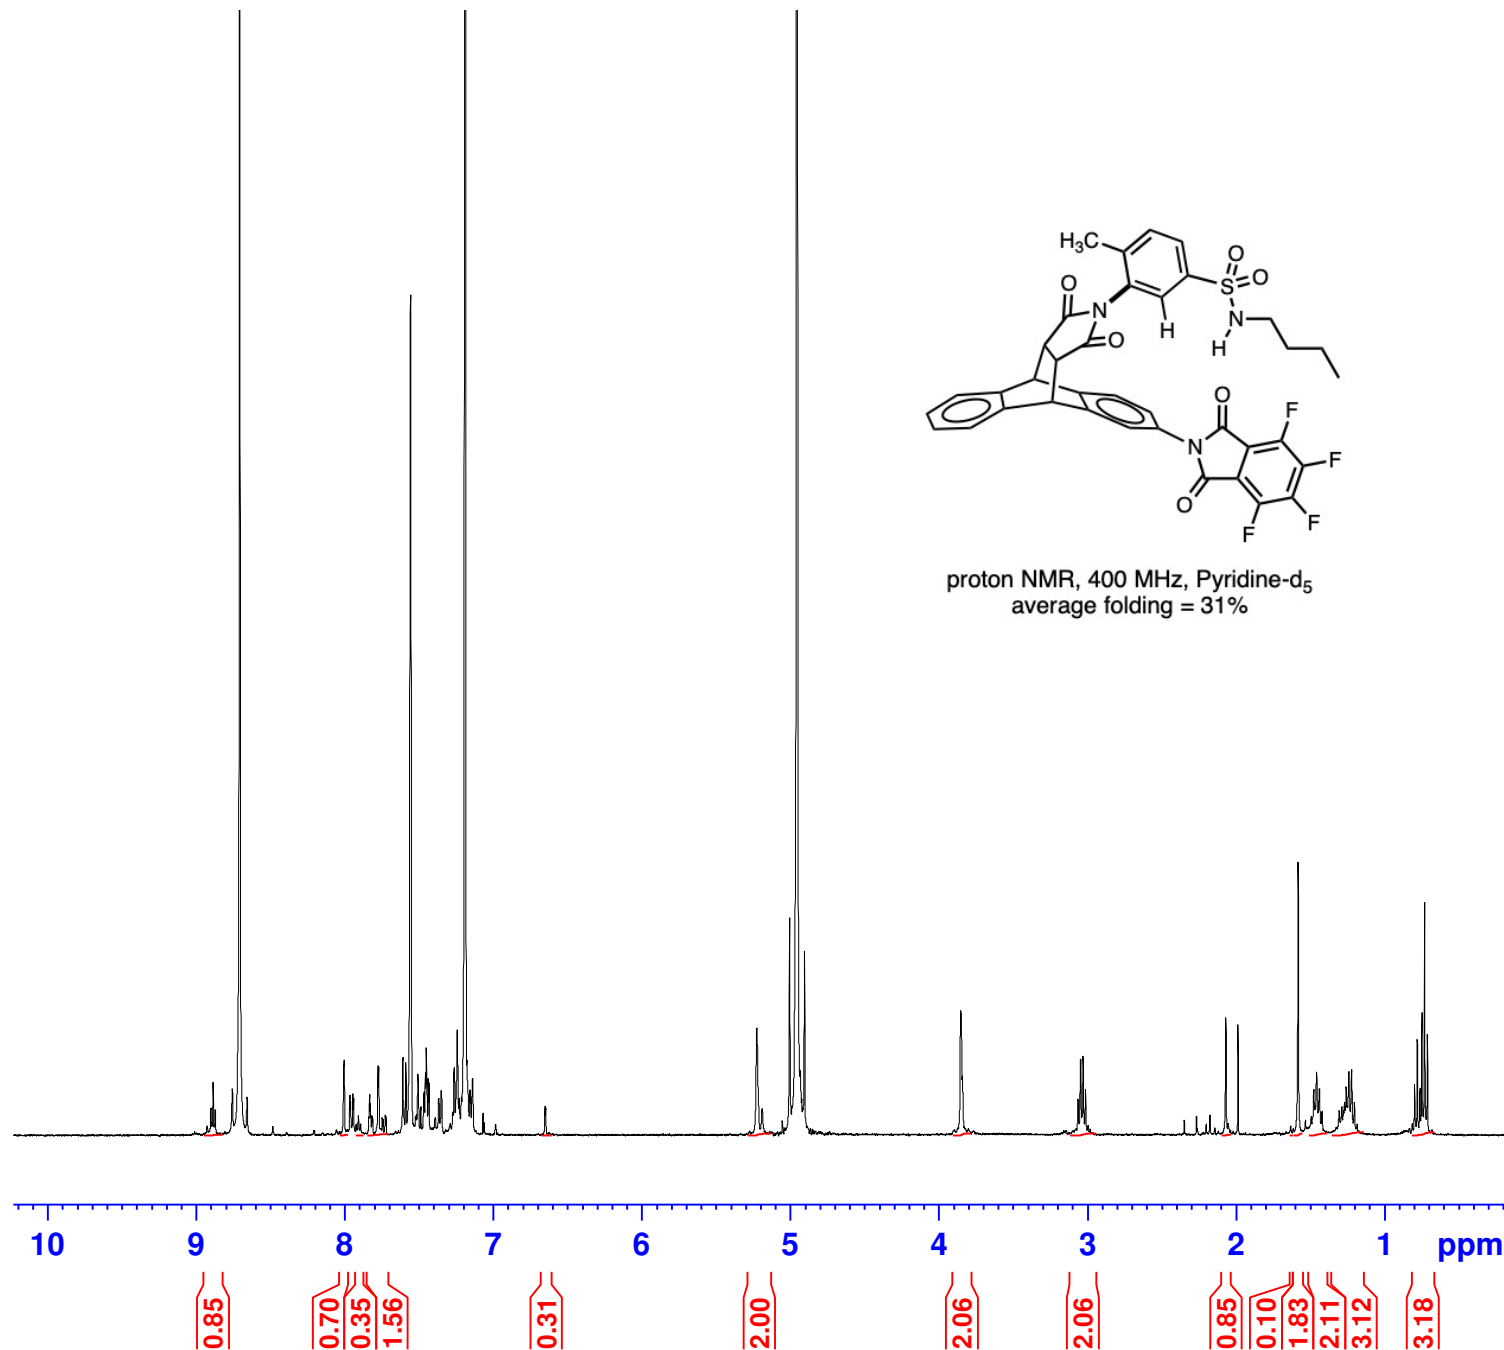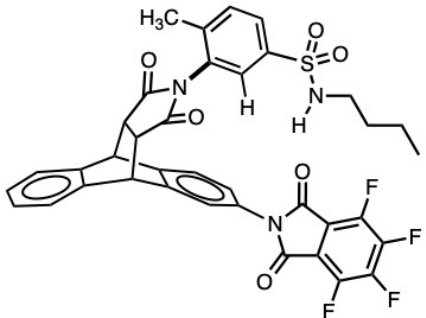

proton NMR, 400 MHz, Pyridine-d<sub>5</sub>  
average folding = 31%

Current Data Parameters  
 NAME emenikemodella-inpyridine3mg  
 EXPNO 1  
 PROCNO 1

F2 - Acquisition Parameters  
 Date\_ 20221031  
 Time 17.43  
 INSTRUM spect  
 PROBHD 5 mm PABBO BB-  
 PULPROG zg30  
 TD 65536  
 SOLVENT Pyr  
 NS 16  
 DS 2  
 SWH 8012.820 Hz  
 FIDRES 0.122266 Hz  
 AQ 4.0894465 sec  
 RG 287  
 DW 62.400 usec  
 DE 6.50 usec  
 TE 298.0 K  
 D1 1.00000000 sec  
 TD0 1

===== CHANNEL f1 =====  
 SFO1 400.1324710 MHz  
 NUC1 1H  
 P1 9.30 usec  
 PLW1 18.00000000 W

F2 - Processing parameters  
 SI 65536  
 SF 400.1300000 MHz  
 WDW EM  
 SSB 0  
 LB 0.30 Hz  
 GB 0  
 PC 1.00



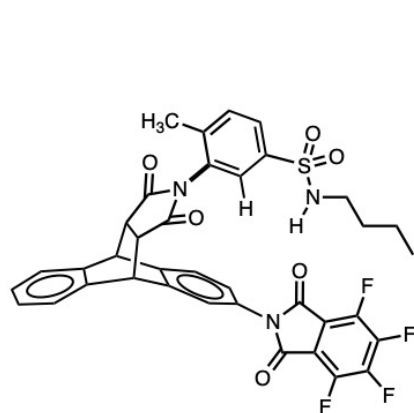

proton NMR, 400 MHz, CD<sub>2</sub>Cl<sub>2</sub>  
average folding = 82%

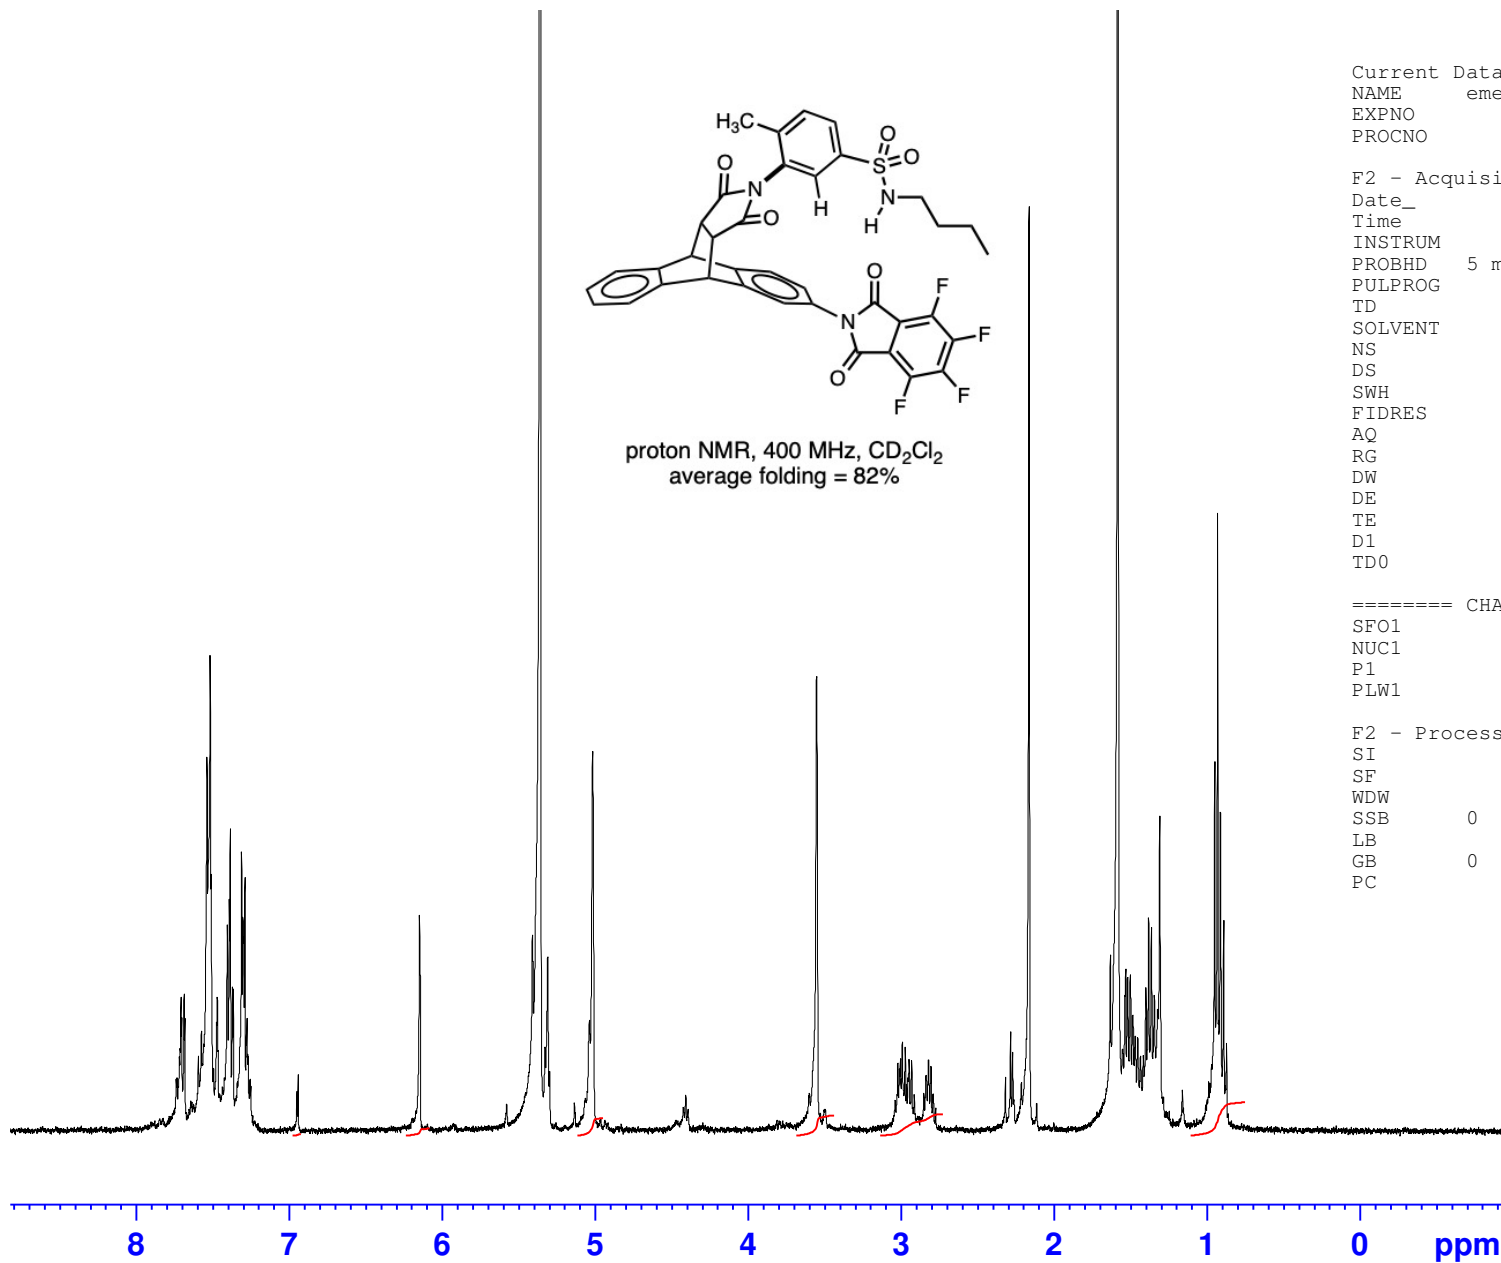

0.17

0.82

2.00

2.29

2.44

3.78

Current Data Parameters

NAME emenikemodella-indichloromethane3mg  
EXPNO 1  
PROCNO 1

F2 - Acquisition Parameters

Date\_ 20221031  
Time 16.38  
INSTRUM spect  
PROBHD 5 mm PABBO BB-  
PULPROG zg30  
TD 65536  
SOLVENT CD2Cl2  
NS 16  
DS 2  
SWH 8012.820 Hz  
FIDRES 0.122266 Hz  
AQ 4.0894465 sec  
RG 575  
DW 62.400 usec  
DE 6.50 usec  
TE 298.0 K  
D1 1.00000000 sec  
TD0 1

==== CHANNEL f1 =====

SFO1 400.1324710 MHz  
NUC1 1H  
P1 9.30 usec  
PLW1 18.00000000 W

F2 - Processing parameters

SI 65536  
SF 400.1300000 MHz  
WDW EM  
SSB 0  
LB 0.30 Hz  
GB 0  
PC 1.00

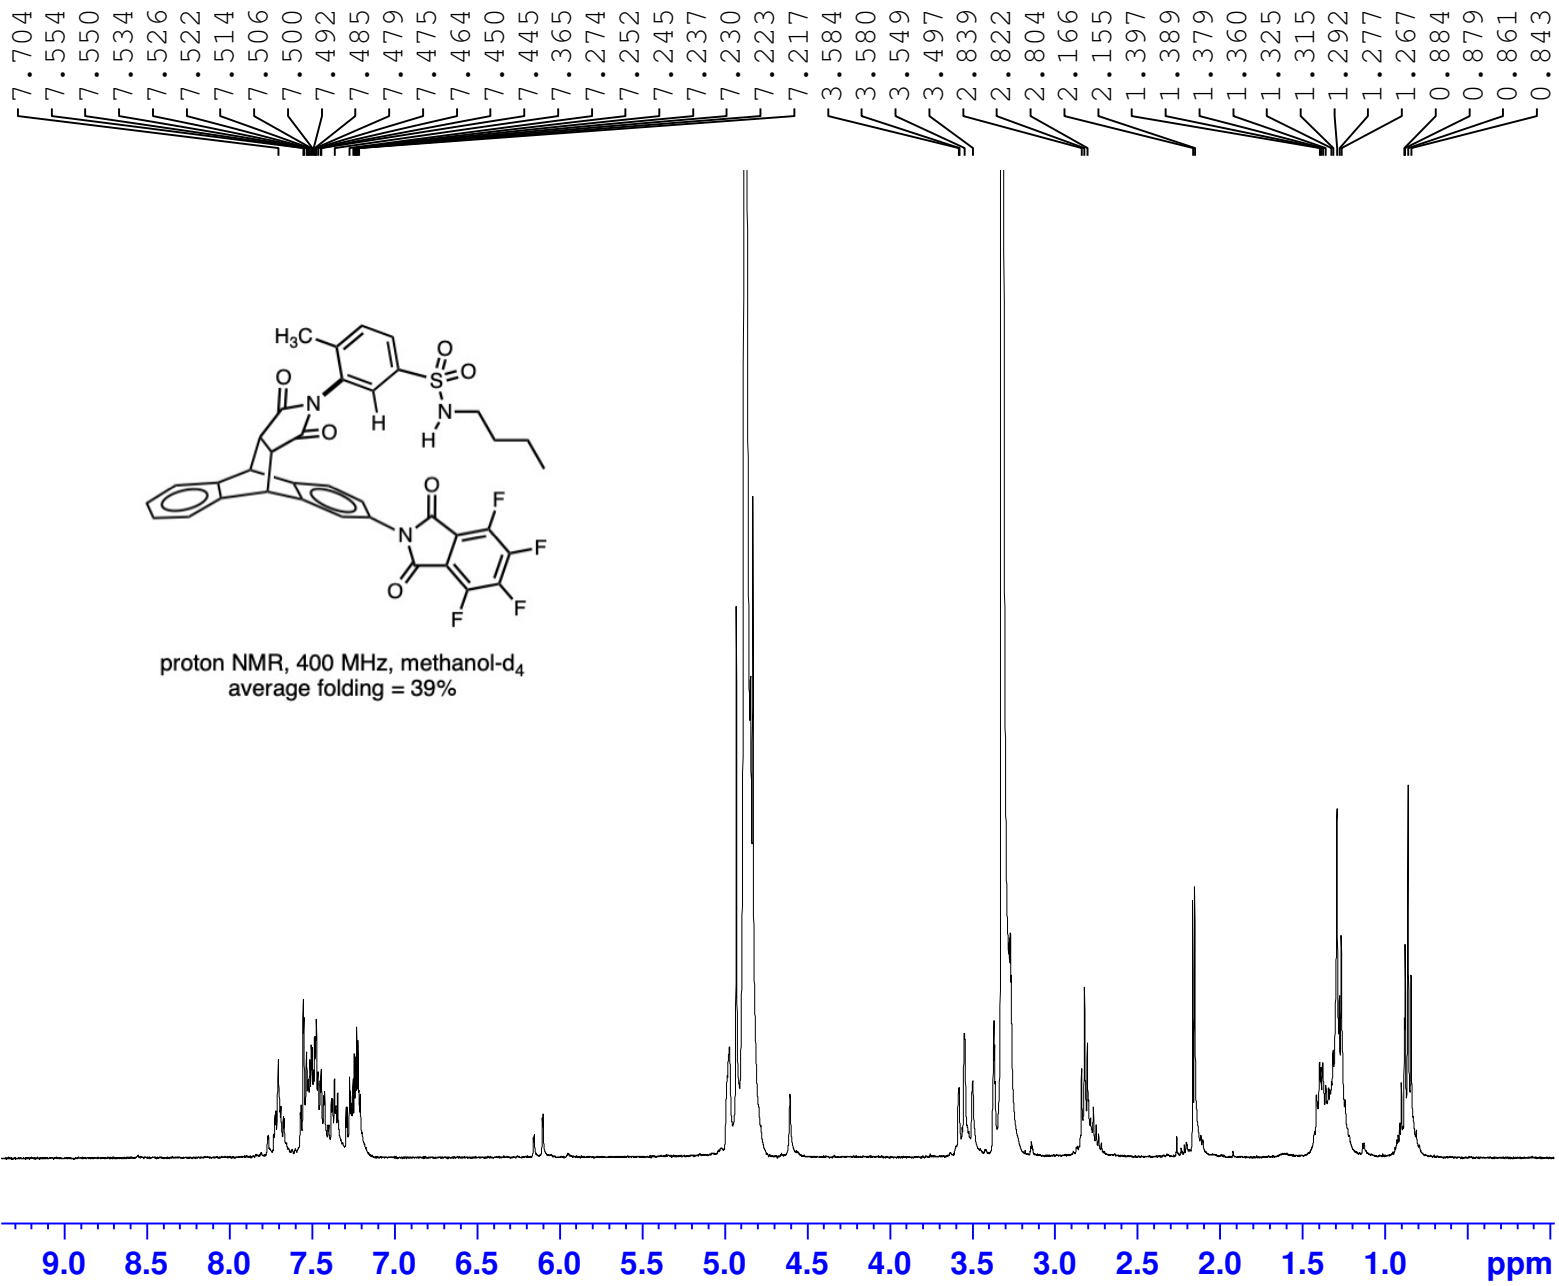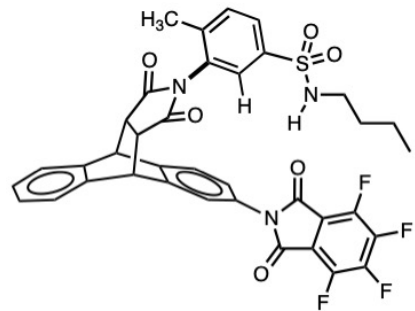

proton NMR, 400 MHz, methanol-d<sub>4</sub>  
average folding = 39%

Current Data Parameters  
 NAME conc-study-9.9mMOLAR-MeOH-1  
 EXPNO 1  
 PROCNO 1

F2 - Acquisition Parameters  
 Date\_ 20211009  
 Time 17.48  
 INSTRUM spect  
 PROBHD 5 mm PABBO BB-  
 PULPROG zg30  
 TD 65536  
 SOLVENT MeOD  
 NS 103  
 DS 2  
 SWH 8012.820 Hz  
 FIDRES 0.122266 Hz  
 AQ 4.0894465 sec  
 RG 512  
 DW 62.400 usec  
 DE 6.50 usec  
 TE 298.0 K  
 D1 1.00000000 sec  
 TD0 1

==== CHANNEL f1 =====  
 SFO1 400.1324710 MHz  
 NUC1 1H  
 P1 9.30 usec  
 PLW1 18.00000000 W

F2 - Processing parameters  
 SI 65536  
 SF 400.1300033 MHz  
 WDW EM  
 SSB 0  
 LB 0.30 Hz  
 GB 0  
 PC 1.00

9.0 8.5 8.0 7.5 7.0 6.5 6.0 5.5 5.0 4.5 4.0 3.5 3.0 2.5 2.0 1.5 1.0 ppm

9.09 0.39 2.01 2.13 0.30 0.74 6.37 3.00

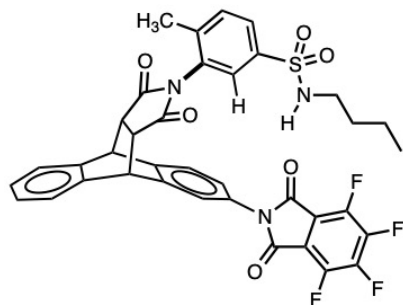

proton NMR, 400 MHz, DMSO-d<sub>6</sub>  
average folding = 9%

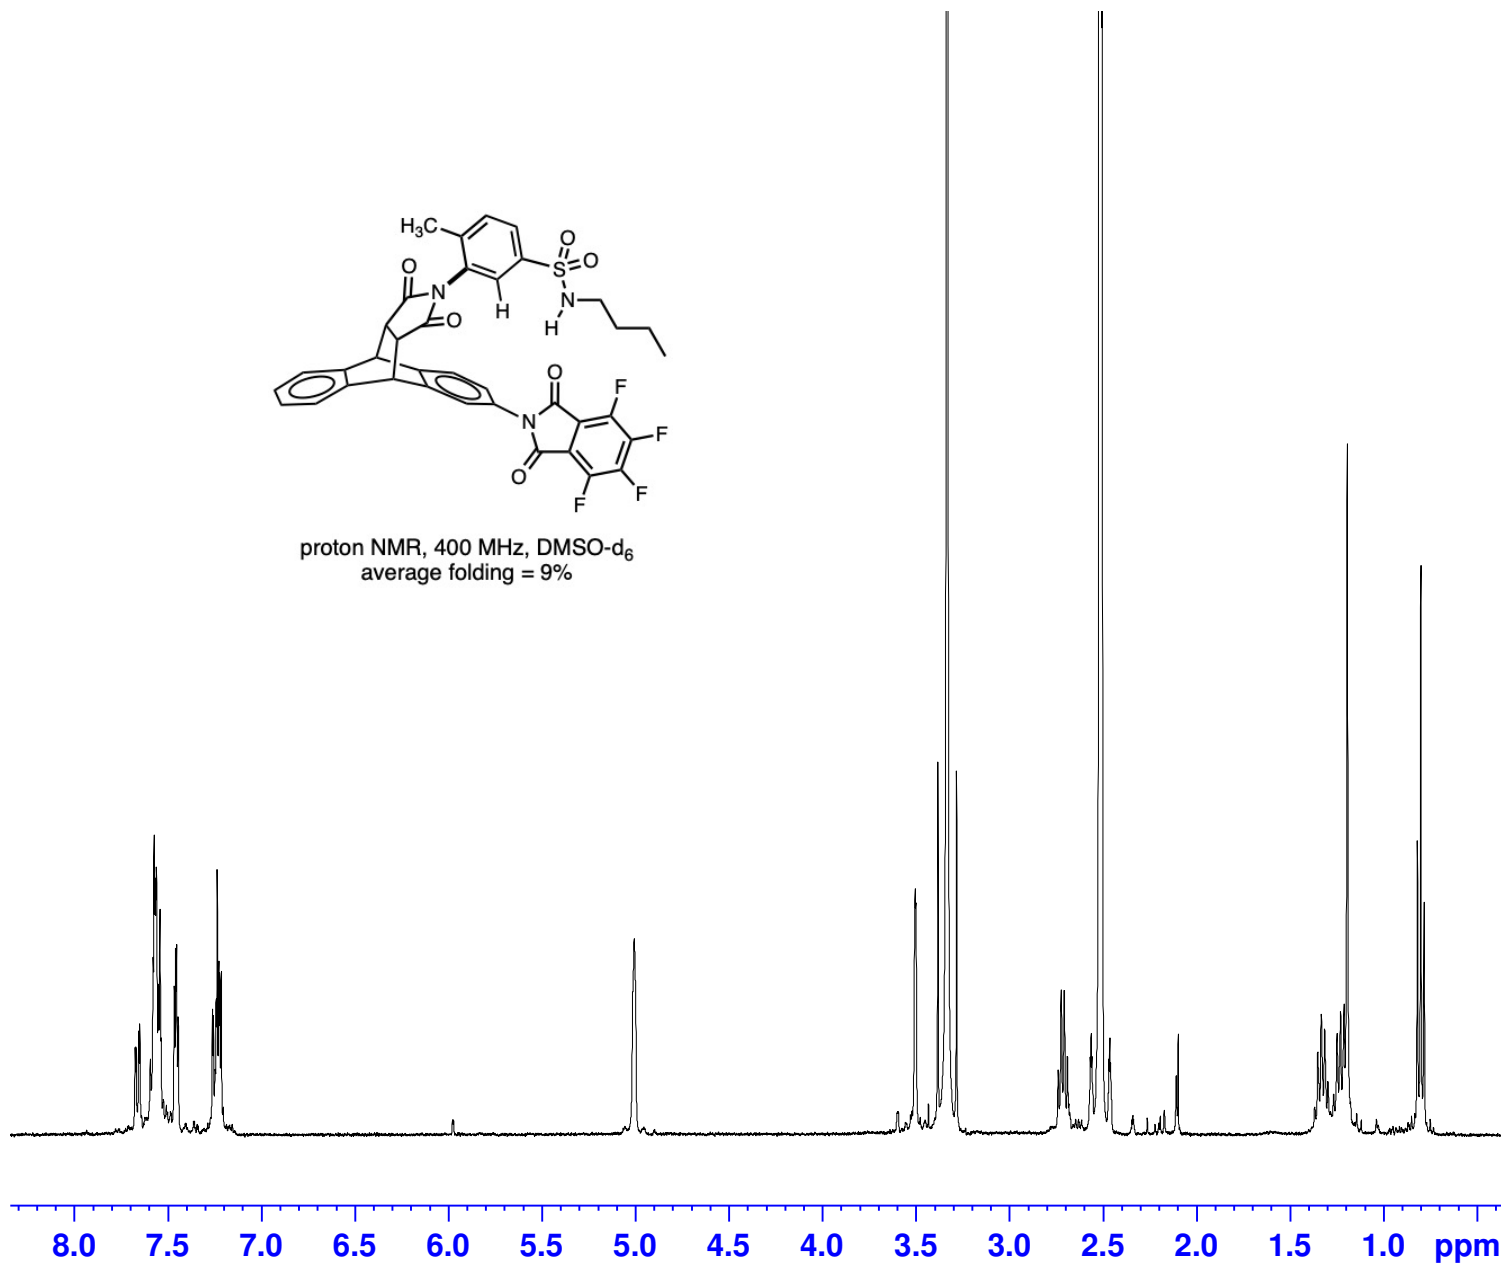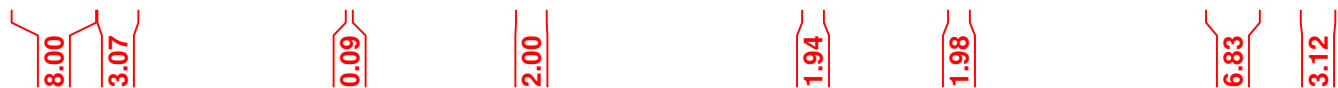

8.00

3.07

0.09

2.00

1.94

1.98

6.83

3.12

Current Data Parameters  
NAME emenikemodella-indmso3  
EXPNO 1  
PROCNO 1

F2 - Acquisition Parameters  
Date\_ 20221031  
Time 16.20  
INSTRUM spect  
PROBHD 5 mm PABBO BB-  
PULPROG zg30  
TD 65536  
SOLVENT DMSO  
NS 16  
DS 2  
SWH 8012.820 Hz  
FIDRES 0.122266 Hz  
AQ 4.0894465 sec  
RG 322  
DW 62.400 usec  
DE 6.50 usec  
TE 298.0 K  
D1 1.0000000 sec  
TD0 1

==== CHANNEL f1 =====  
SFO1 400.1324710 MHz  
NUC1 1H  
P1 9.30 usec  
PLW1 18.0000000 W

F2 - Processing parameters  
SI 65536  
SF 400.1300000 MHz  
WDW EM  
SSB 0  
LB 0.30 Hz  
GB 0  
PC 1.00

8.075  
7.772  
7.767  
7.752  
7.747  
7.669  
7.665  
7.634  
7.613  
7.600  
7.589  
7.556  
7.551  
7.489  
7.472  
7.459  
7.370  
7.365  
7.350  
7.345  
7.266  
7.258  
7.253  
7.245  
6.173  
5.075  
2.973  
2.968  
2.959  
2.873  
2.853  
2.836  
2.819  
2.801  
2.796  
2.790  
1.435  
1.417  
1.398  
1.380  
1.284  
1.266  
1.249  
1.171  
0.875  
0.862  
0.806

Current Data Parameters  
NAME conc-study-9.9mMOLAR-dmf-1  
EXPNO 1  
PROCNO 1

F2 - Acquisition Parameters  
Date\_ 20211006  
Time 17.19  
INSTRUM spect  
PROBHD 5 mm PABBO BB-  
PULPROG zg30  
TD 65536  
SOLVENT DMF  
NS 220  
DS 2  
SWH 8012.820 Hz  
FIDRES 0.122266 Hz  
AQ 4.0894465 sec  
RG 203  
DW 62.400 usec  
DE 6.50 usec  
TE 298.0 K  
D1 1.00000000 sec  
TD0 1

==== CHANNEL f1 =====  
SFO1 400.1324710 MHz  
NUC1 1H  
P1 9.30 usec  
PLW1 18.00000000 W

F2 - Processing parameters  
SI 65536  
SF 400.1300033 MHz  
WDW EM  
SSB 0  
LB 0.30 Hz  
GB 0  
PC 1.00

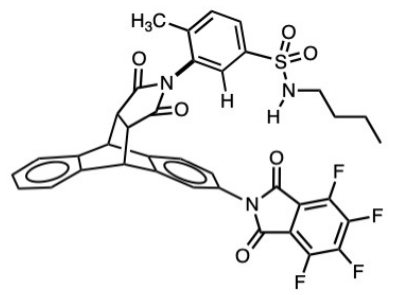

proton NMR, 400 MHz, DMF-d<sub>7</sub>  
average folding = 19%

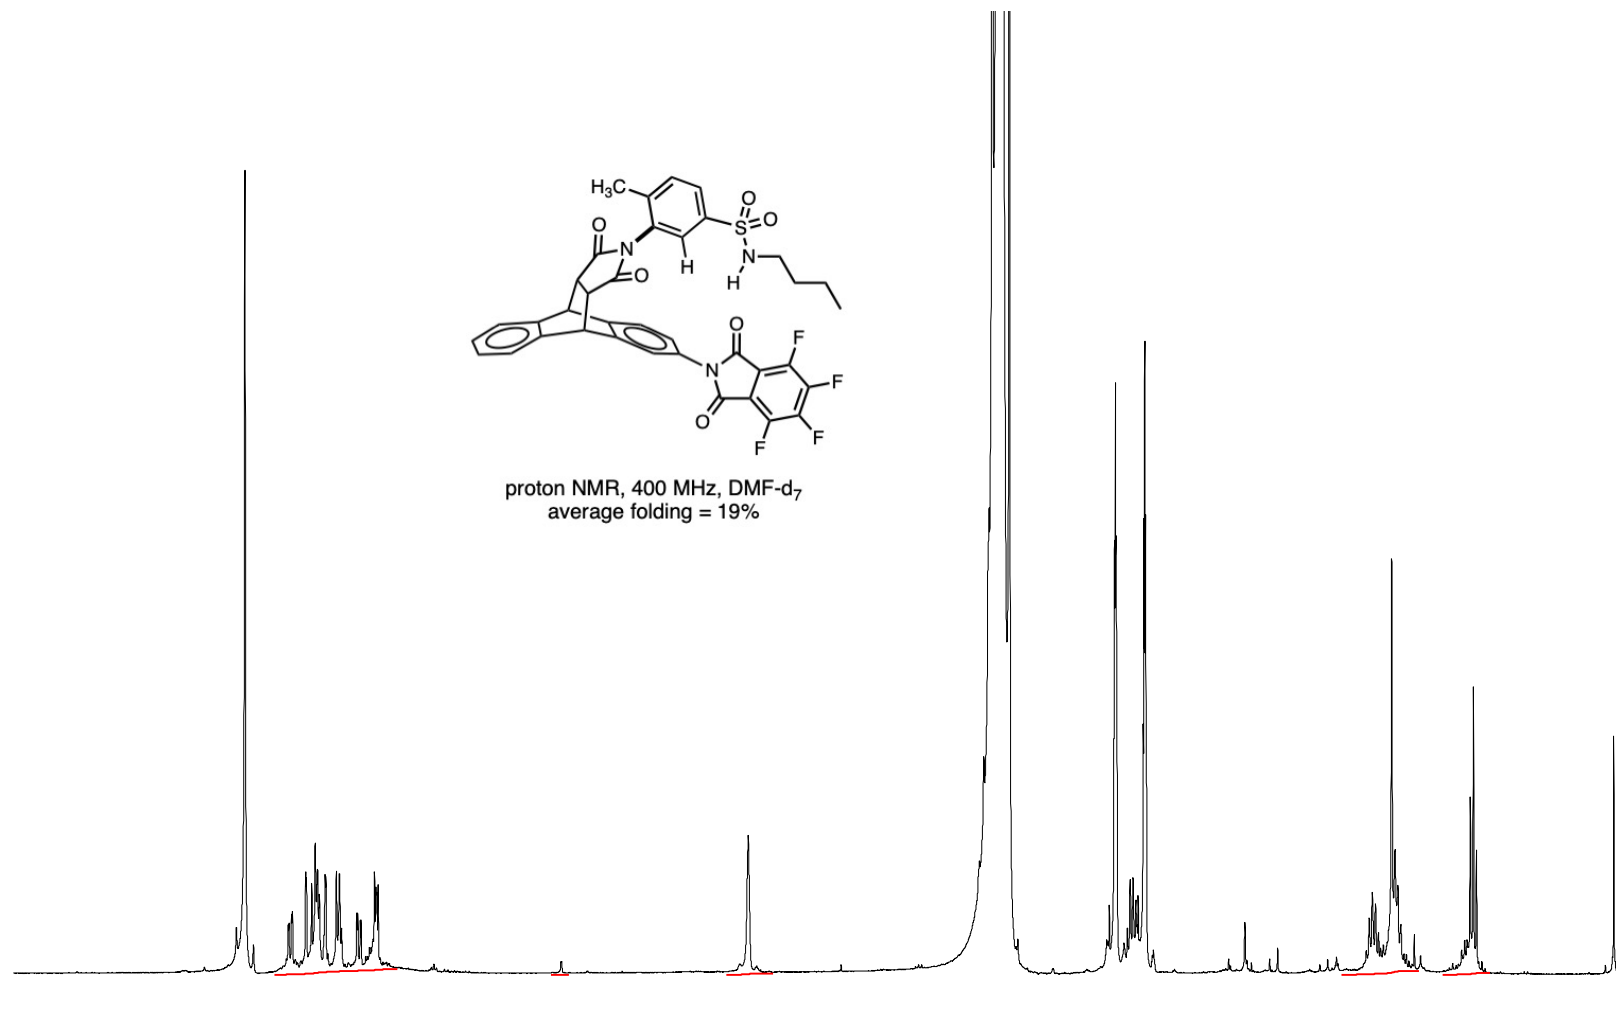

9.0 8.5 8.0 7.5 7.0 6.5 6.0 5.5 5.0 4.5 4.0 3.5 3.0 2.5 2.0 1.5 1.0 ppm

10.22  
0.19  
2.00  
7.37  
3.20

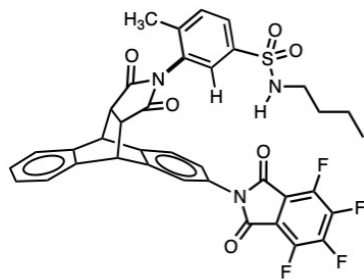

proton NMR, 400 MHz, CCl<sub>4</sub> (locked in CDCl<sub>3</sub> via insert)  
average folding = 82%

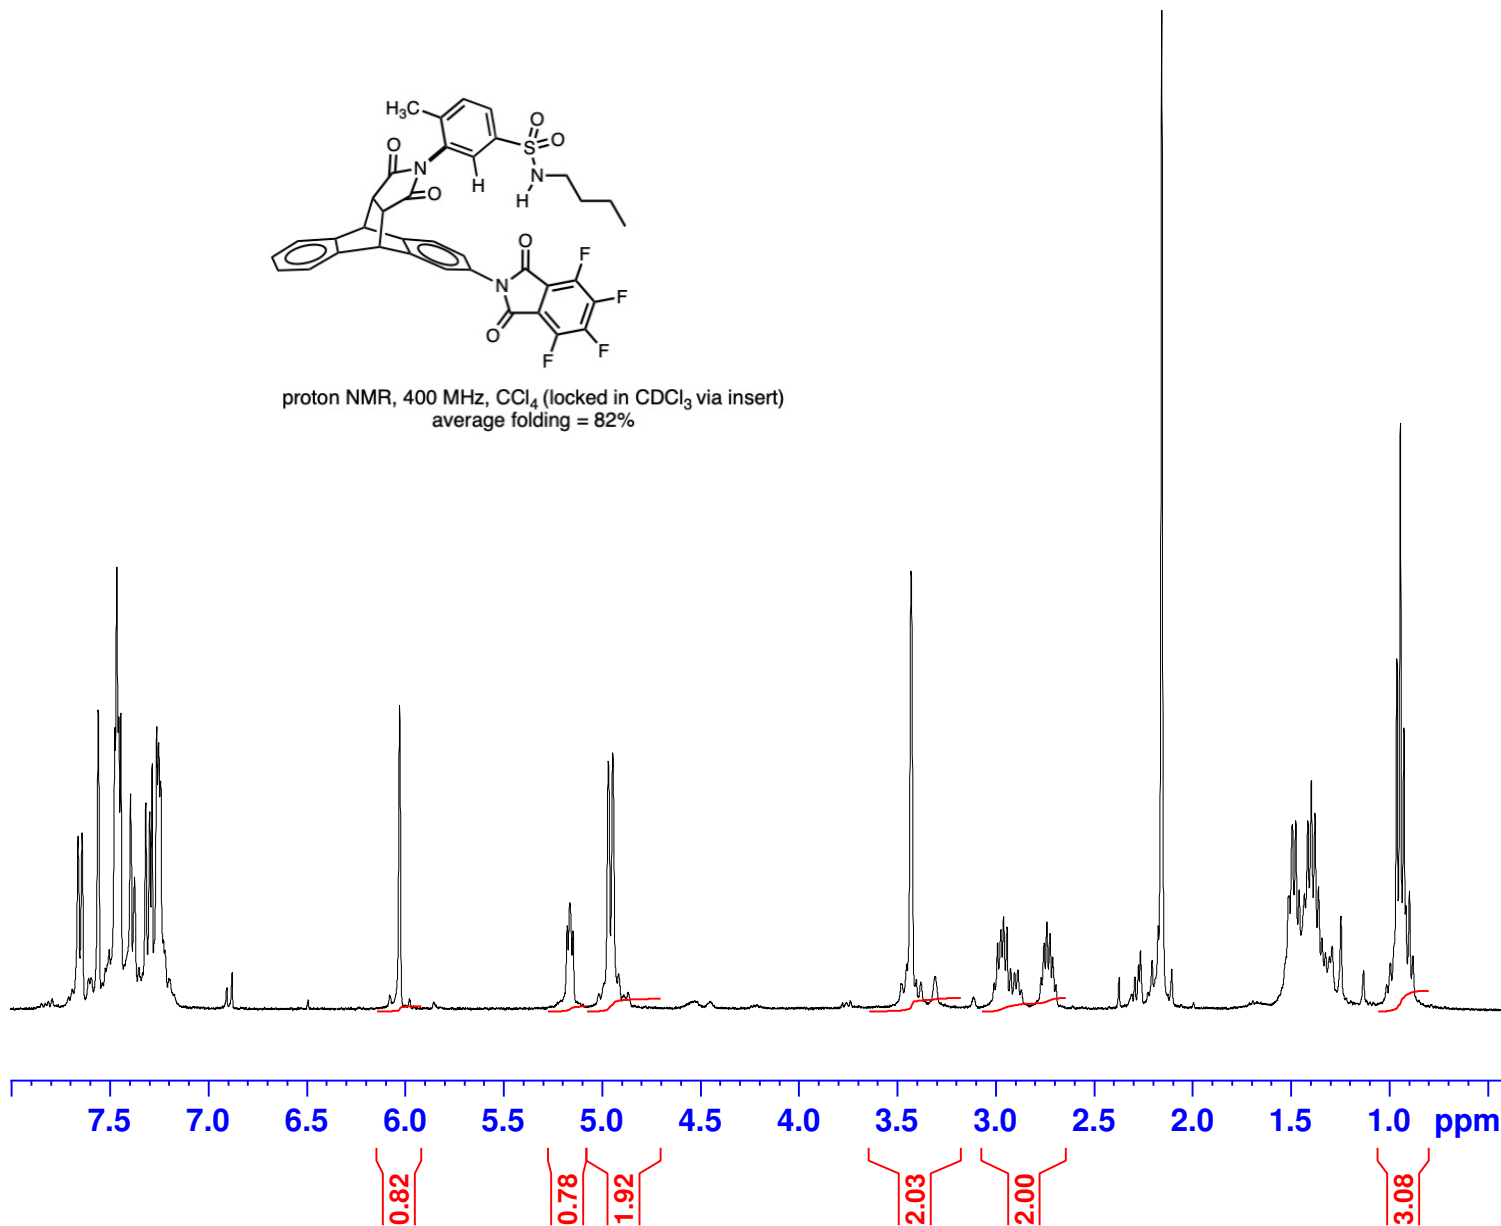

Current Data Parameters  
NAME balance-sulfanamide-CCl4  
EXPNO 1  
PROCNO 1

F2 - Acquisition Parameters  
Date\_ 20221224  
Time 15.58  
INSTRUM spect  
PROBHD 5 mm PABBO BB-  
PULPROG zg30  
TD 65536  
SOLVENT CDCl3  
NS 48  
DS 2  
SWH 8012.820 Hz  
FIDRES 0.122266 Hz  
AQ 4.0894465 sec  
RG 322  
DW 62.400 usec  
DE 6.50 usec  
TE 298.0 K  
D1 1.00000000 sec  
TD0 1

==== CHANNEL f1 =====  
SFO1 400.1324710 MHz  
NUC1 1H  
P1 9.30 usec  
PLW1 18.00000000 W

F2 - Processing parameters  
SI 65536  
SF 400.1300000 MHz  
WDW EM  
SSB 0  
LB 0.30 Hz  
GB 0  
PC 1.00

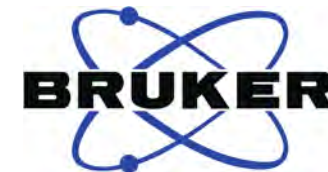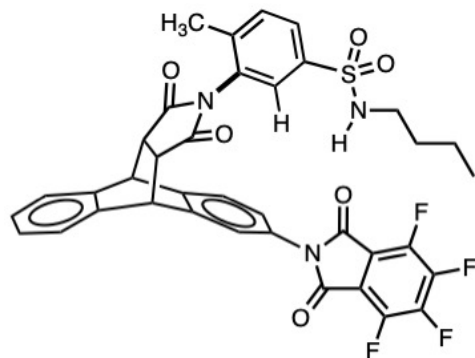

proton NMR, 400 MHz, Benzene-d6  
average folding = 85%

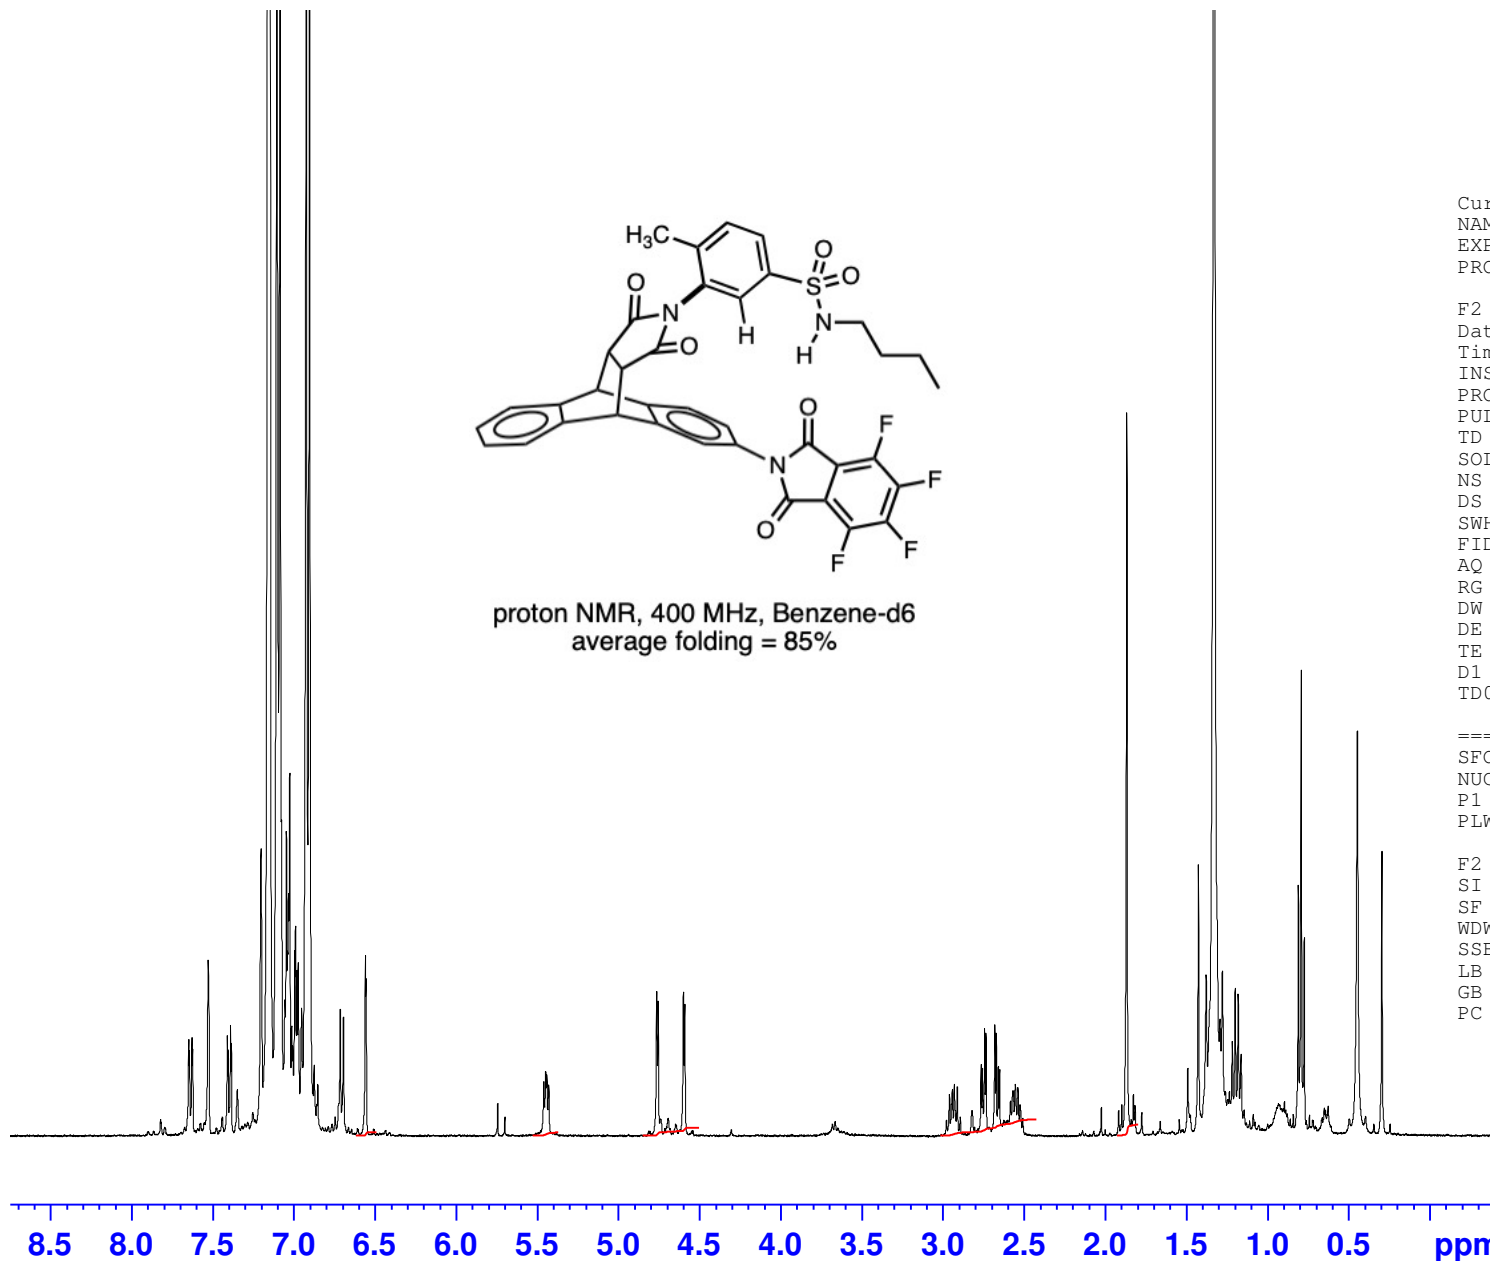

Current Data Parameters  
NAME balance-sulfanamide-benzene  
EXPNO 1  
PROCNO 1

F2 - Acquisition Parameters  
Date\_ 20221224  
Time 15.25  
INSTRUM spect  
PROBHD 5 mm PABBO BB-  
PULPROG zg30  
TD 65536  
SOLVENT C6D6  
NS 69  
DS 2  
SWH 8012.820 Hz  
FIDRES 0.122266 Hz  
AQ 4.0894465 sec  
RG 256  
DW 62.400 usec  
DE 6.50 usec  
TE 298.0 K  
D1 1.00000000 sec  
TD0 1

==== CHANNEL f1 =====  
SFO1 400.1324710 MHz  
NUC1 1H  
P1 9.30 usec  
PLW1 18.00000000 W

F2 - Processing parameters  
SI 65536  
SF 400.1300000 MHz  
WDW EM  
SSB 0  
LB 0.30 Hz  
GB 0  
PC 1.00

7.714  
7.709  
7.694  
7.689  
7.563  
7.543  
7.528  
7.524  
7.520  
7.514  
7.512  
7.506  
7.455  
7.442  
7.437  
7.410  
7.263  
7.255  
7.251  
7.246  
7.242  
7.232  
7.226  
5.000  
3.570  
3.566  
3.539  
3.535  
3.531  
2.830  
2.814  
1.386  
1.383  
1.365  
1.296  
1.291  
1.273  
1.271  
1.246  
0.882  
0.863  
0.861  
0.843  
0.825

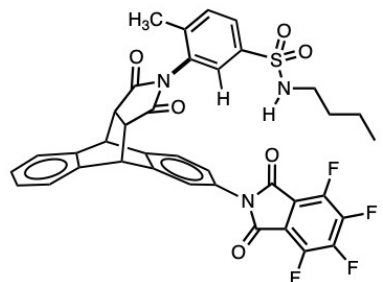

proton NMR, 400 MHz, MeCN-d<sub>3</sub>  
average folding = 39%

Current Data Parameters  
NAME conc-study-9.9mMOLAR-MECN  
EXPNO 1  
PROCNO 1

F2 - Acquisition Parameters  
Date\_ 20210925  
Time 15.34  
INSTRUM spect  
PROBHD 5 mm PABBO BB-  
PULPROG zg30  
TD 65536  
SOLVENT CD3CN  
NS 120  
DS 2  
SWH 8012.820 Hz  
FIDRES 0.122266 Hz  
AQ 4.0894465 sec  
RG 512  
DW 62.400 usec  
DE 6.50 usec  
TE 298.0 K  
D1 1.00000000 sec  
TDO 1

===== CHANNEL f1 =====  
SFO1 400.1324710 MHz  
NUC1 1H  
P1 9.30 usec  
PLW1 18.00000000 W

F2 - Processing parameters  
SI 65536  
SF 400.1300033 MHz  
WDW EM  
SSB 0  
LB 0.30 Hz  
GB 0  
PC 1.00

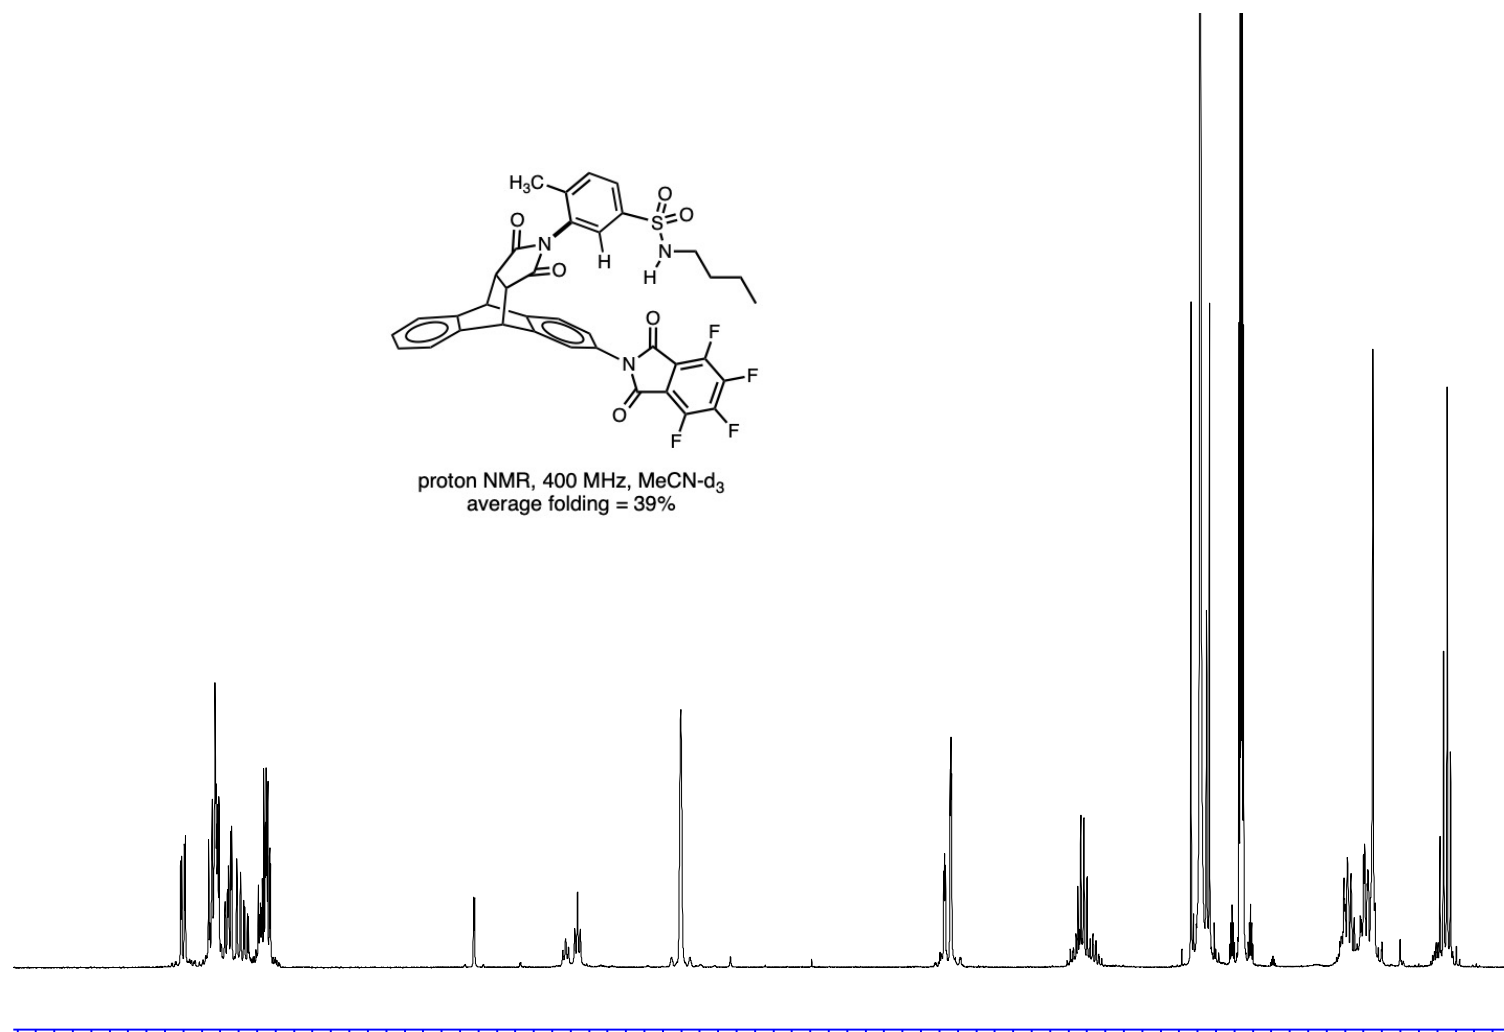

8.5 8.0 7.5 7.0 6.5 6.0 5.5 5.0 4.5 4.0 3.5 3.0 2.5 2.0 1.5 ppm

9.08  
0.39  
0.32  
0.59  
1.88  
2.00  
2.03  
6.03  
2.91

7.734  
7.729  
7.714  
7.709  
7.600  
7.580  
7.571  
7.565  
7.556  
7.520  
7.515  
7.506  
7.502  
7.436  
7.415  
7.335  
7.330  
7.315  
7.310  
7.264  
7.257  
7.248  
7.243  
7.235  
5.057  
5.041  
3.629  
3.626  
3.623  
1.465  
1.447  
1.440  
1.428  
1.355  
1.338  
1.316  
1.306  
1.299  
0.905  
0.886  
0.874  
0.868  
0.856  
0.837

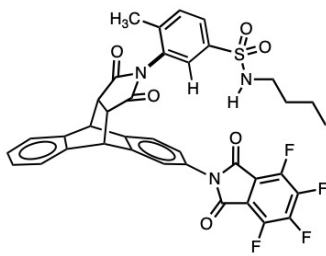

proton NMR, 400 MHz, acetone-d<sub>6</sub>  
average folding = 34%

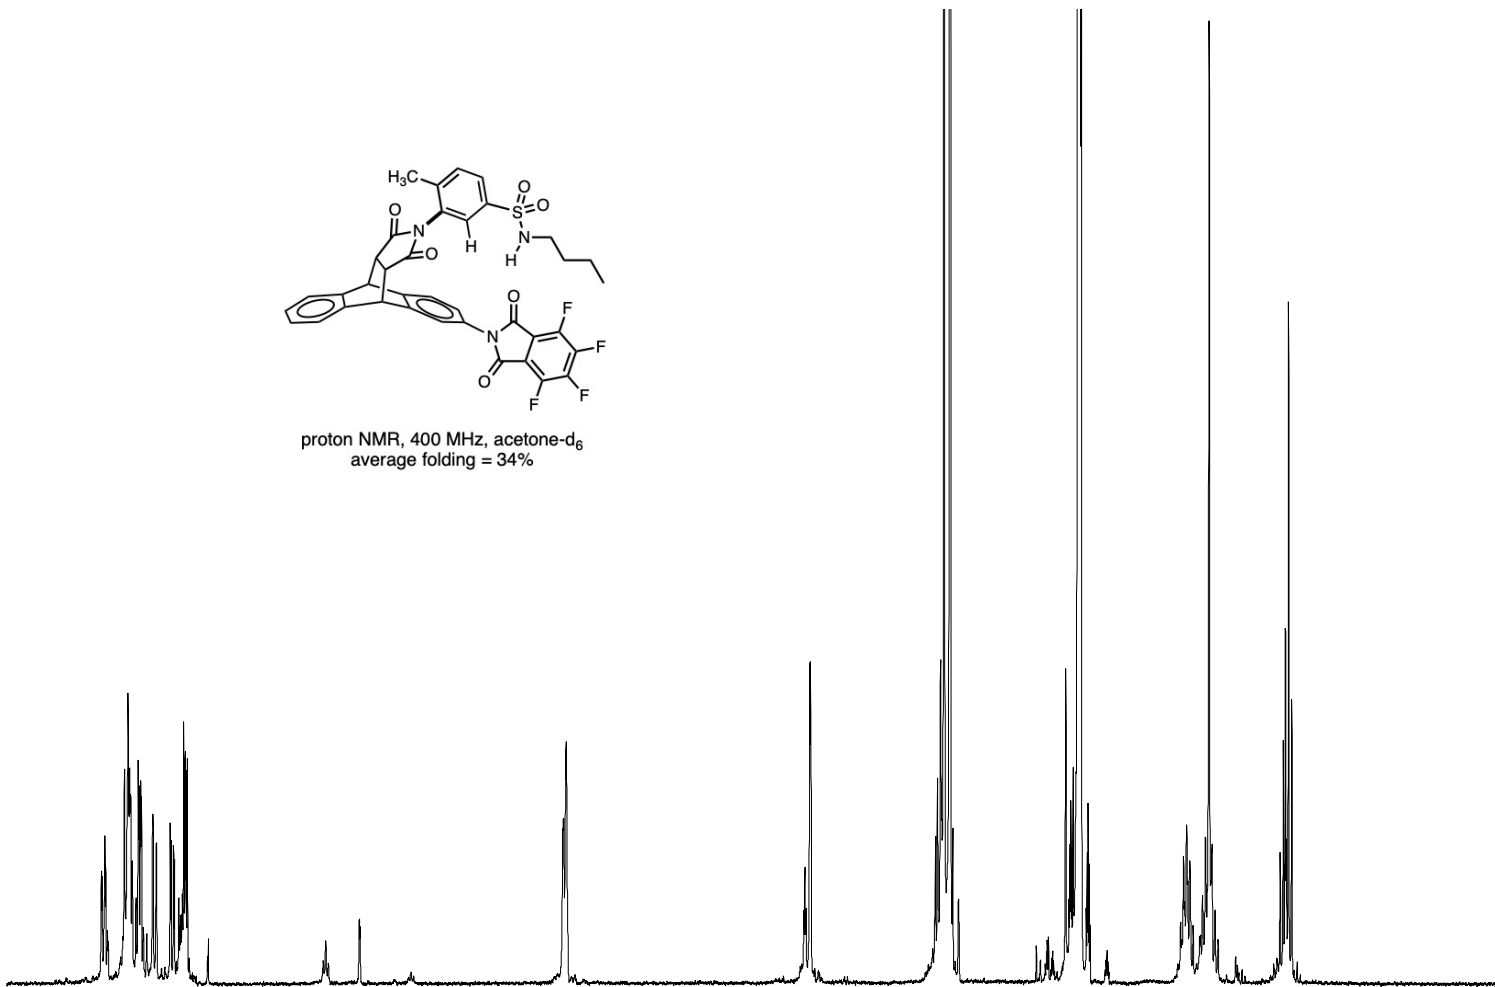

8.0 7.5 7.0 6.5 6.0 5.5 5.0 4.5 4.0 3.5 3.0 2.5 2.0 1.5 1.0 0.5 ppm

Current Data Parameters  
NAME emenikemodella-inacetone3mg  
EXPNO 1  
PROCNO 1

F2 - Acquisition Parameters  
Date\_ 20221031  
Time\_ 15.37  
INSTRUM spect  
PROBHD 5 mm PABBO BB-  
PULPROG zg30  
TD 65536  
SOLVENT Acetone  
NS 16  
DS 2  
SWH 8012.820 Hz  
FIDRES 0.122266 Hz  
AQ 4.0894465 sec  
RG 362  
DW 62.400 usec  
DE 6.50 usec  
TE 298.0 K  
D1 1.00000000 sec  
TD0 1

==== CHANNEL f1 =====  
SFO1 400.1324710 MHz  
NUC1 1H  
P1 9.30 usec  
PLW1 18.00000000 W

F2 - Processing parameters  
SI 65536  
SF 400.1300000 MHz  
WDW EM  
SSB 0  
LB 0.30 Hz  
GB 0  
PC 1.00



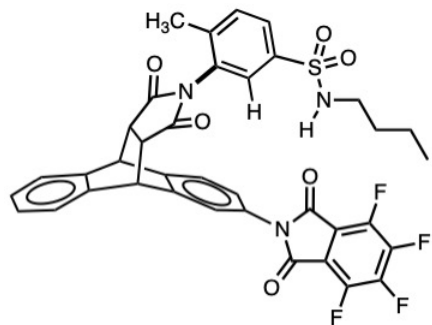

proton NMR, 400 MHz, acetic acid-d<sub>4</sub>  
average folding = 50%

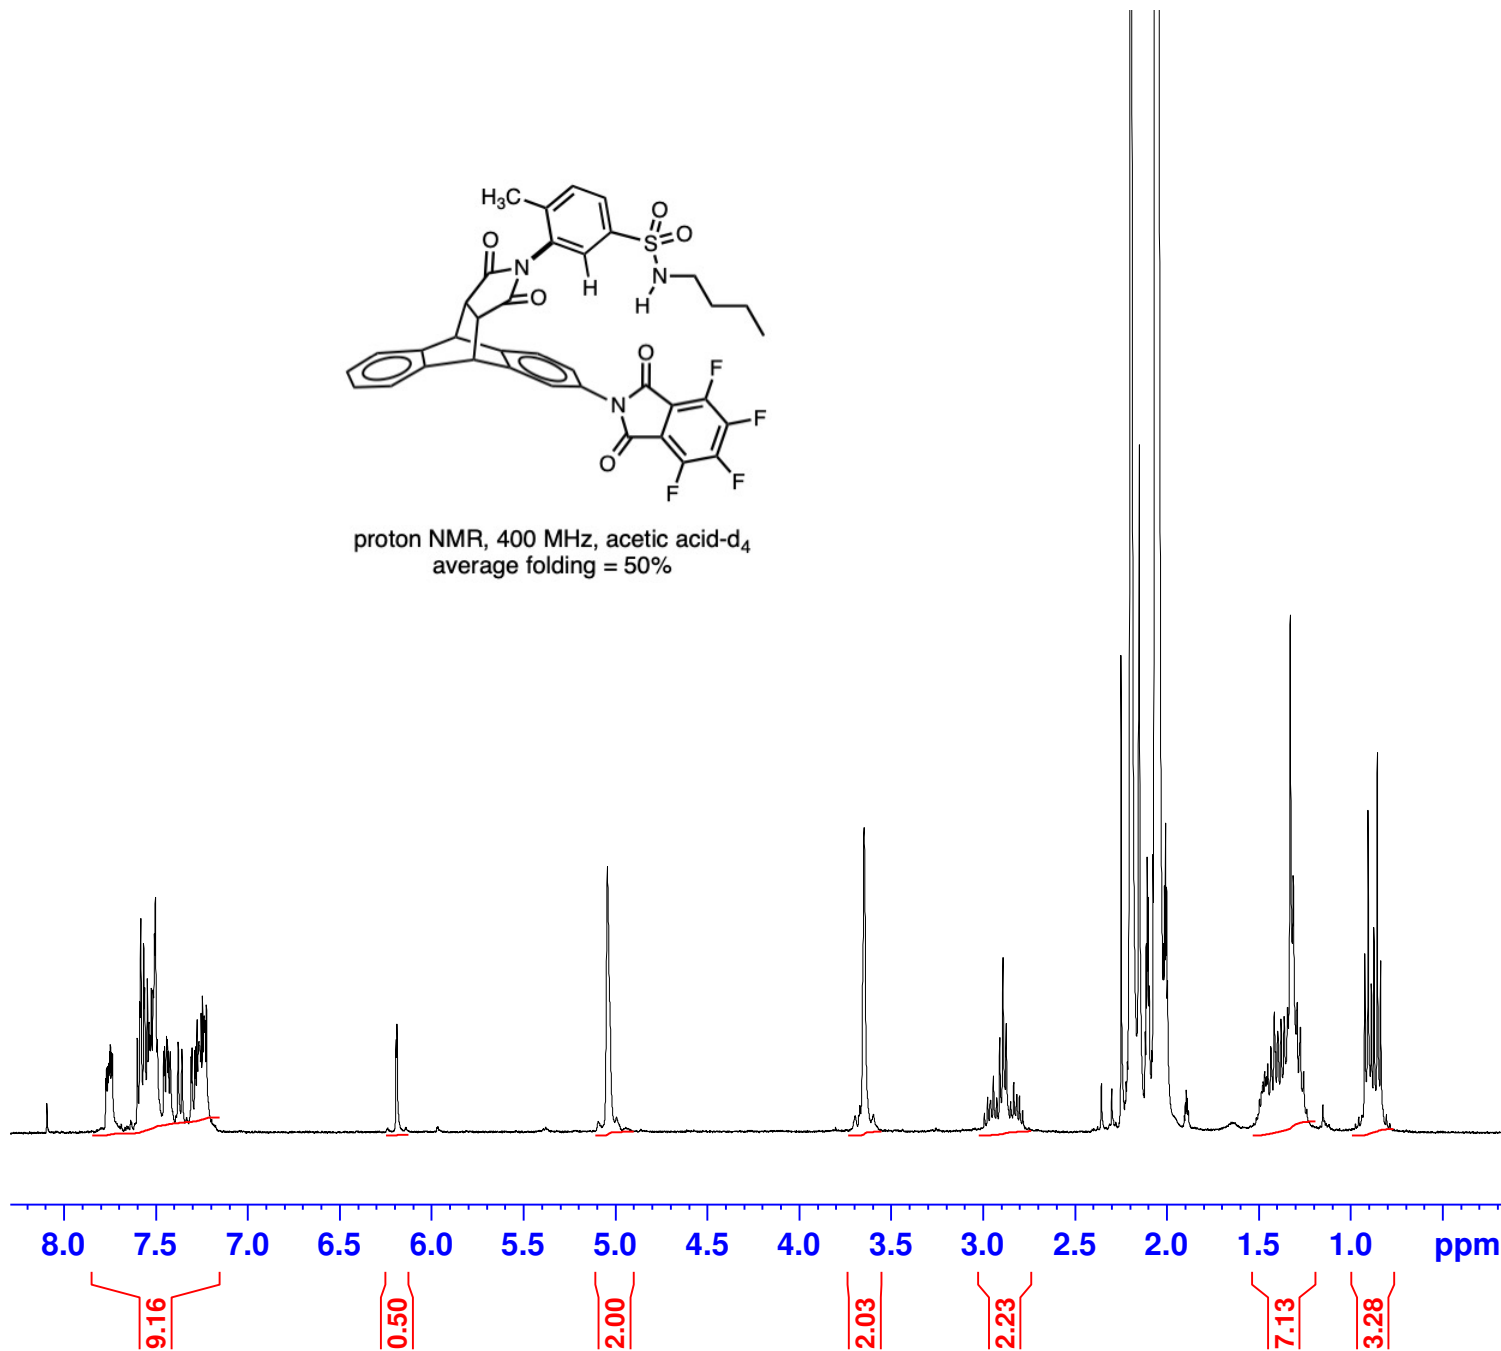

Current Data Parameters  
NAME conc-study-9.9mMOLAR-aceticacid  
EXPNO 1  
PROCNO 1

F2 - Acquisition Parameters

Date\_ 20211009  
Time 13.13  
INSTRUM spect  
PROBHD 5 mm PABBO BB-  
PULPROG zg30  
TD 65536  
SOLVENT Acetic  
NS 150  
DS 2  
SWH 8012.820 Hz  
FIDRES 0.122266 Hz  
AQ 4.0894465 sec  
RG 575  
DW 62.400 usec  
DE 6.50 usec  
TE 298.0 K  
D1 1.00000000 sec  
TD0 1

===== CHANNEL f1 =====

SFO1 400.1324710 MHz  
NUC1 1H  
P1 9.30 usec  
PLW1 18.00000000 W

F2 - Processing parameters

SI 65536  
SF 400.1300033 MHz  
WDW EM  
SSB 0  
LB 0.30 Hz  
GB 0  
PC 1.00

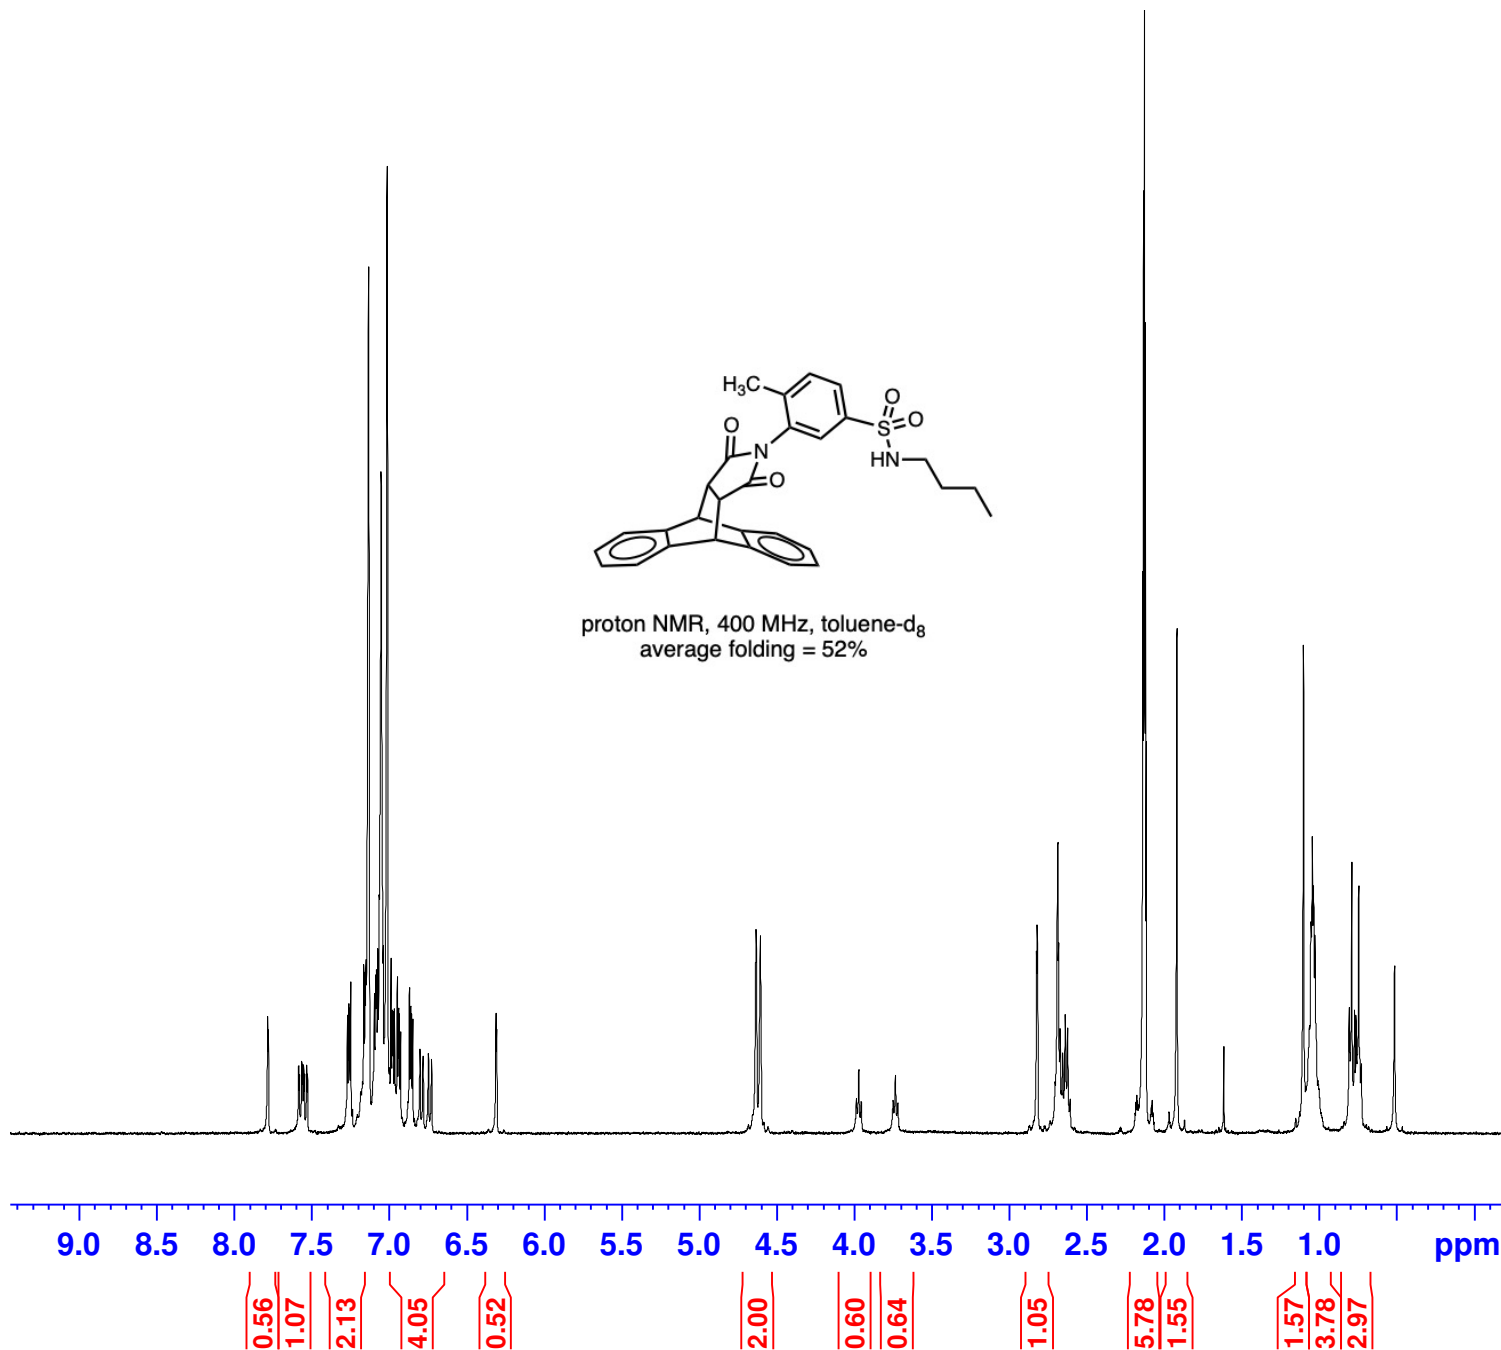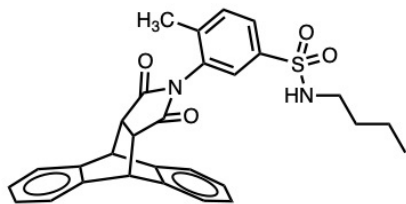

Current Data Parameters  
 NAME controlnov19balanceintoluene  
 EXPNO 1  
 PROCNO 1

F2 - Acquisition Parameters  
 Date\_ 20221119  
 Time 16.20  
 INSTRUM spect  
 PROBHD 5 mm PABBO BB-  
 PULPROG zg30  
 TD 65536  
 SOLVENT Tol  
 NS 16  
 DS 2  
 SWH 8012.820 Hz  
 FIDRES 0.122266 Hz  
 AQ 4.0894465 sec  
 RG 322  
 DW 62.400 usec  
 DE 6.50 usec  
 TE 298.0 K  
 D1 1.00000000 sec  
 TD0 1

===== CHANNEL f1 =====  
 SFO1 400.1324710 MHz  
 NUC1 1H  
 P1 9.30 usec  
 PLW1 18.00000000 W

F2 - Processing parameters  
 SI 65536  
 SF 400.1300000 MHz  
 WDW EM  
 SSB 0  
 LB 0.30 Hz  
 GB 0  
 PC 1.00

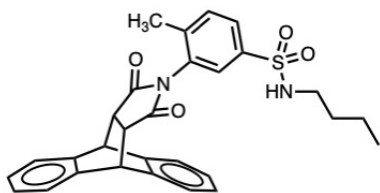

proton NMR, 400 MHz, *tert*-butanol-d<sub>10</sub>  
average folding = 39%

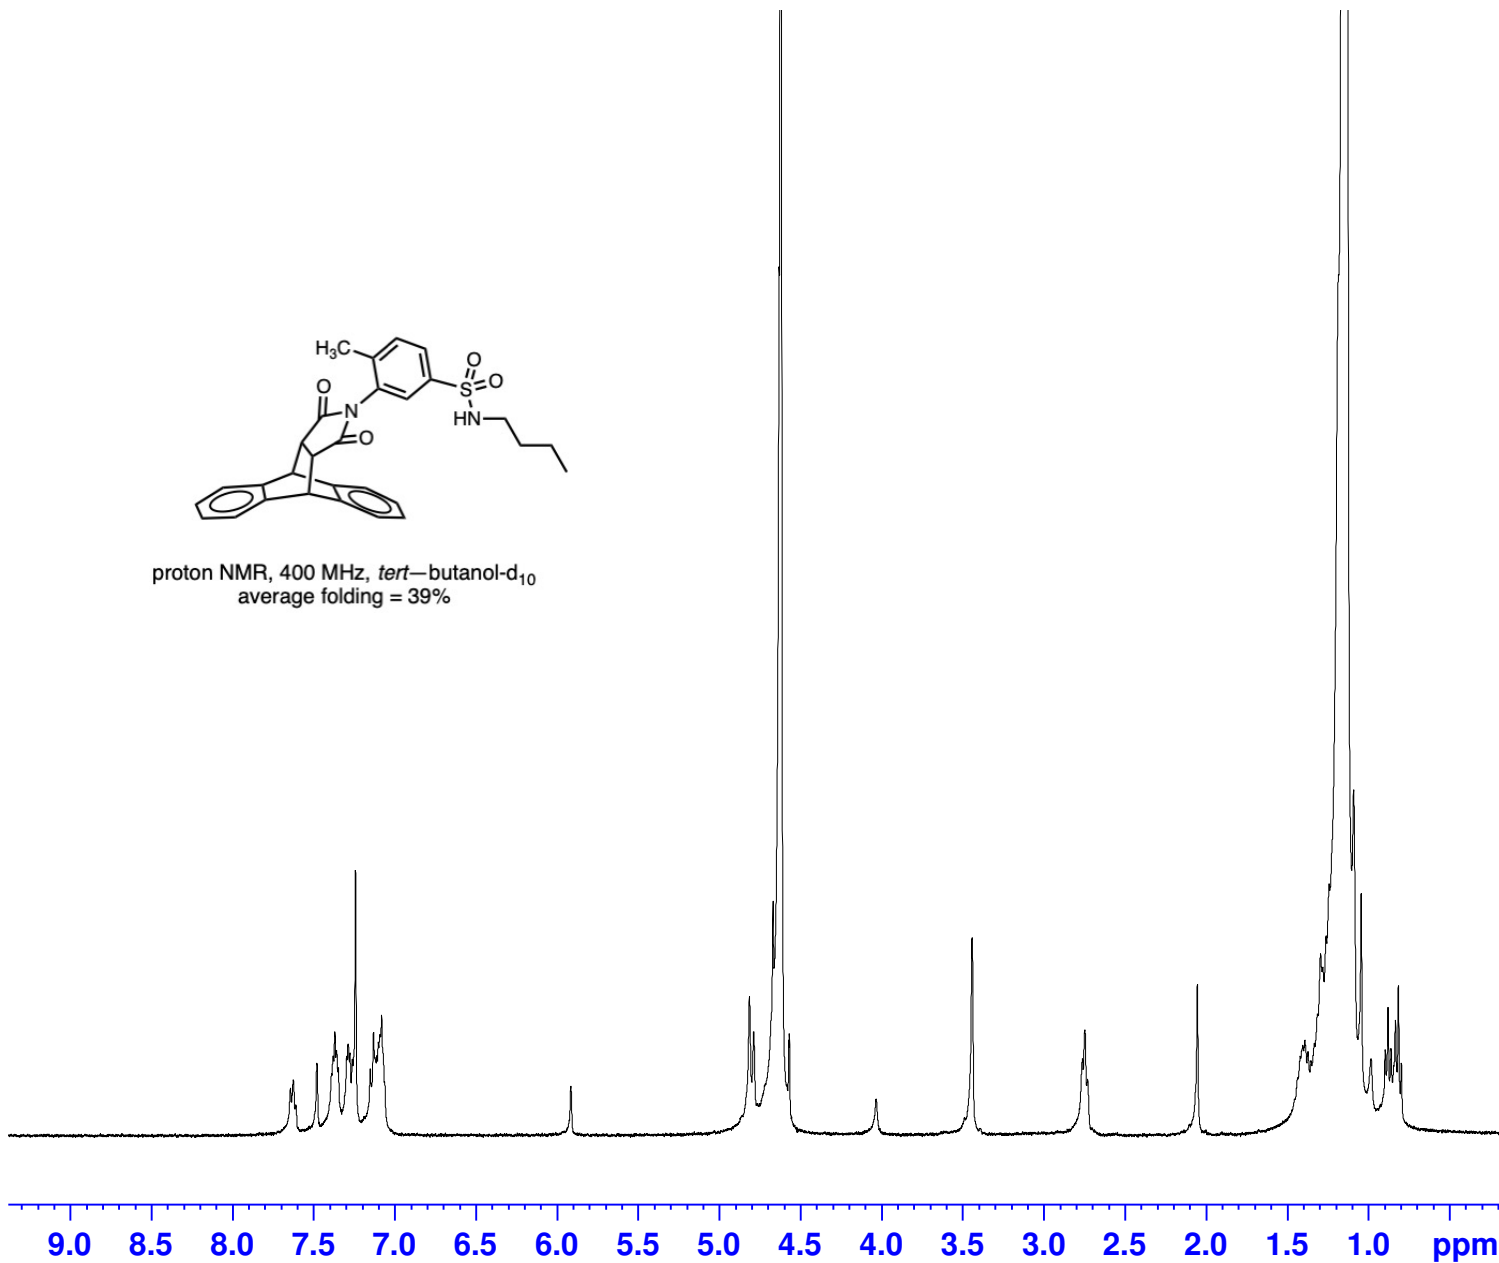

Integration values (in red): 10.35, 0.39, 0.53, 2.00, 1.98, 1.21

Current Data Parameters  
NAME controlnovi9balancein-tertbutanol  
EXPNO 1  
PROCNO 1

F2 - Acquisition Parameters  
Date\_ 20221119  
Time 18.15  
INSTRUM spect  
PROBHD 5 mm PABBO BB-  
PULPROG zg30  
TD 65536  
SOLVENT EtOD  
NS 16  
DS 2  
SWH 8012.820 Hz  
FIDRES 0.122266 Hz  
AQ 4.0894465 sec  
RG 228  
DW 62.400 usec  
DE 6.50 usec  
TE 298.0 K  
D1 1.00000000 sec  
TD0 1

==== CHANNEL f1 =====  
SF01 400.1324710 MHz  
NUC1 1H  
P1 9.30 usec  
PLW1 18.00000000 W

F2 - Processing parameters  
SI 65536  
SF 400.1300000 MHz  
WDW EM  
SSB 0  
LB 0.30 Hz  
GB 0  
PC 1.00

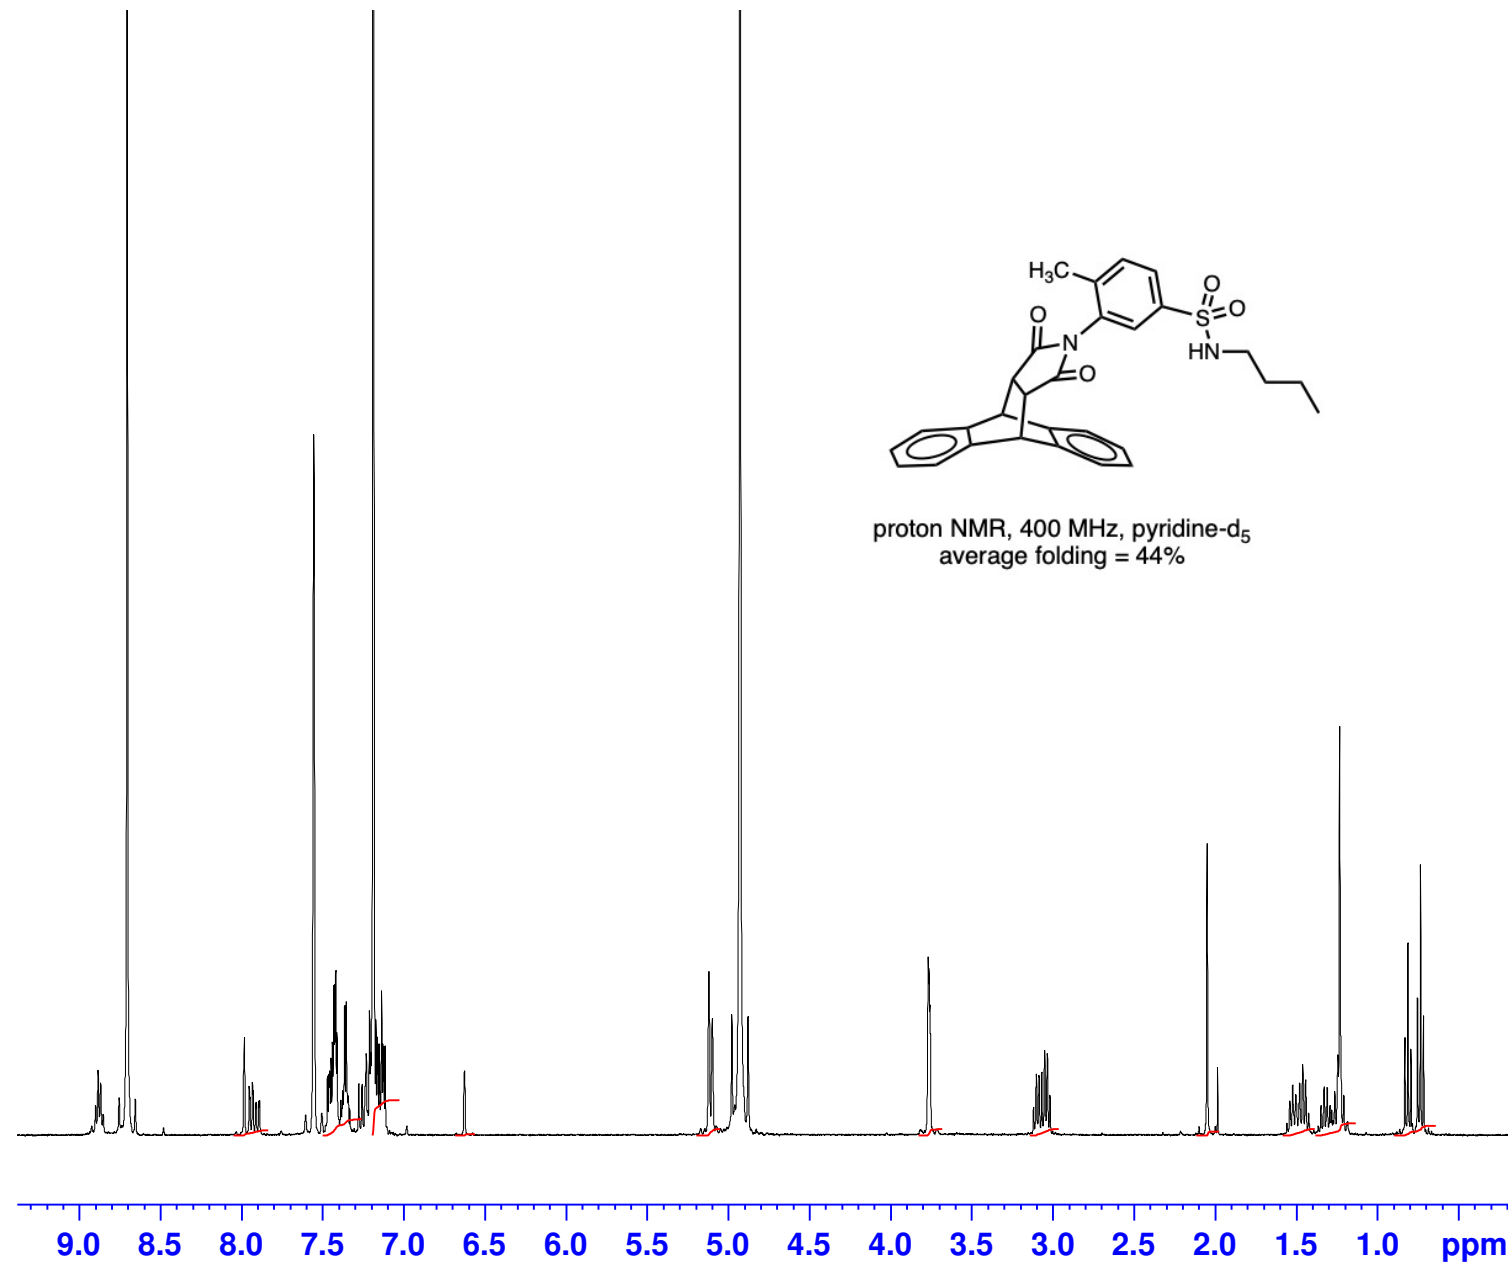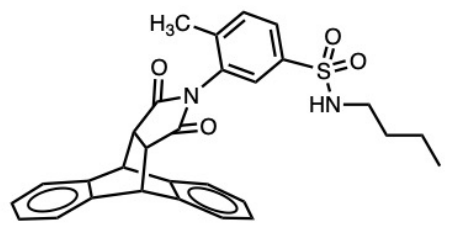

proton NMR, 400 MHz, pyridine-d<sub>5</sub>  
average folding = 44%

Current Data Parameters  
 NAME controlnov19balanceinpyridine  
 EXPNO 1  
 PROCNO 1

F2 - Acquisition Parameters  
 Date\_ 20221119  
 Time 15.40  
 INSTRUM spect  
 PROBHD 5 mm PABBO BB-  
 PULPROG zg30  
 TD 65536  
 SOLVENT Pyr  
 NS 16  
 DS 2  
 SWH 8012.820 Hz  
 FIDRES 0.122266 Hz  
 AQ 4.0894465 sec  
 RG 287  
 DW 62.400 usec  
 DE 6.50 usec  
 TE 298.0 K  
 D1 1.0000000 sec  
 TDO 1

==== CHANNEL f1 =====  
 SFO1 400.1324710 MHz  
 NUC1 1H  
 P1 9.30 usec  
 PLW1 18.0000000 W

F2 - Processing parameters  
 SI 65536  
 SF 400.1300000 MHz  
 WDW EM  
 SSB 0  
 LB 0.30 Hz  
 GB 0  
 PC 1.00

7.543  
7.492  
7.484  
7.475  
7.466  
7.461  
7.453  
7.379  
7.374  
7.366  
7.352  
7.341  
7.336  
7.331  
7.328  
7.245  
7.237  
7.231  
7.223  
7.214  
7.206  
7.200  
7.192  
4.884  
4.880  
4.876  
3.531  
3.527  
3.526  
3.522  
3.504  
3.500  
3.496  
2.828  
2.810  
2.801  
1.406  
1.136  
0.948  
0.930  
0.912  
0.888  
0.869  
0.851

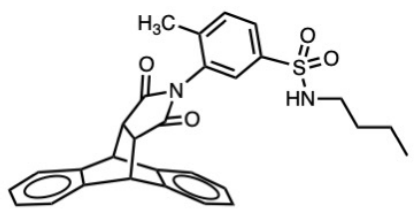

proton NMR, 400 MHz, methanol-d<sub>4</sub>  
average folding = 51%

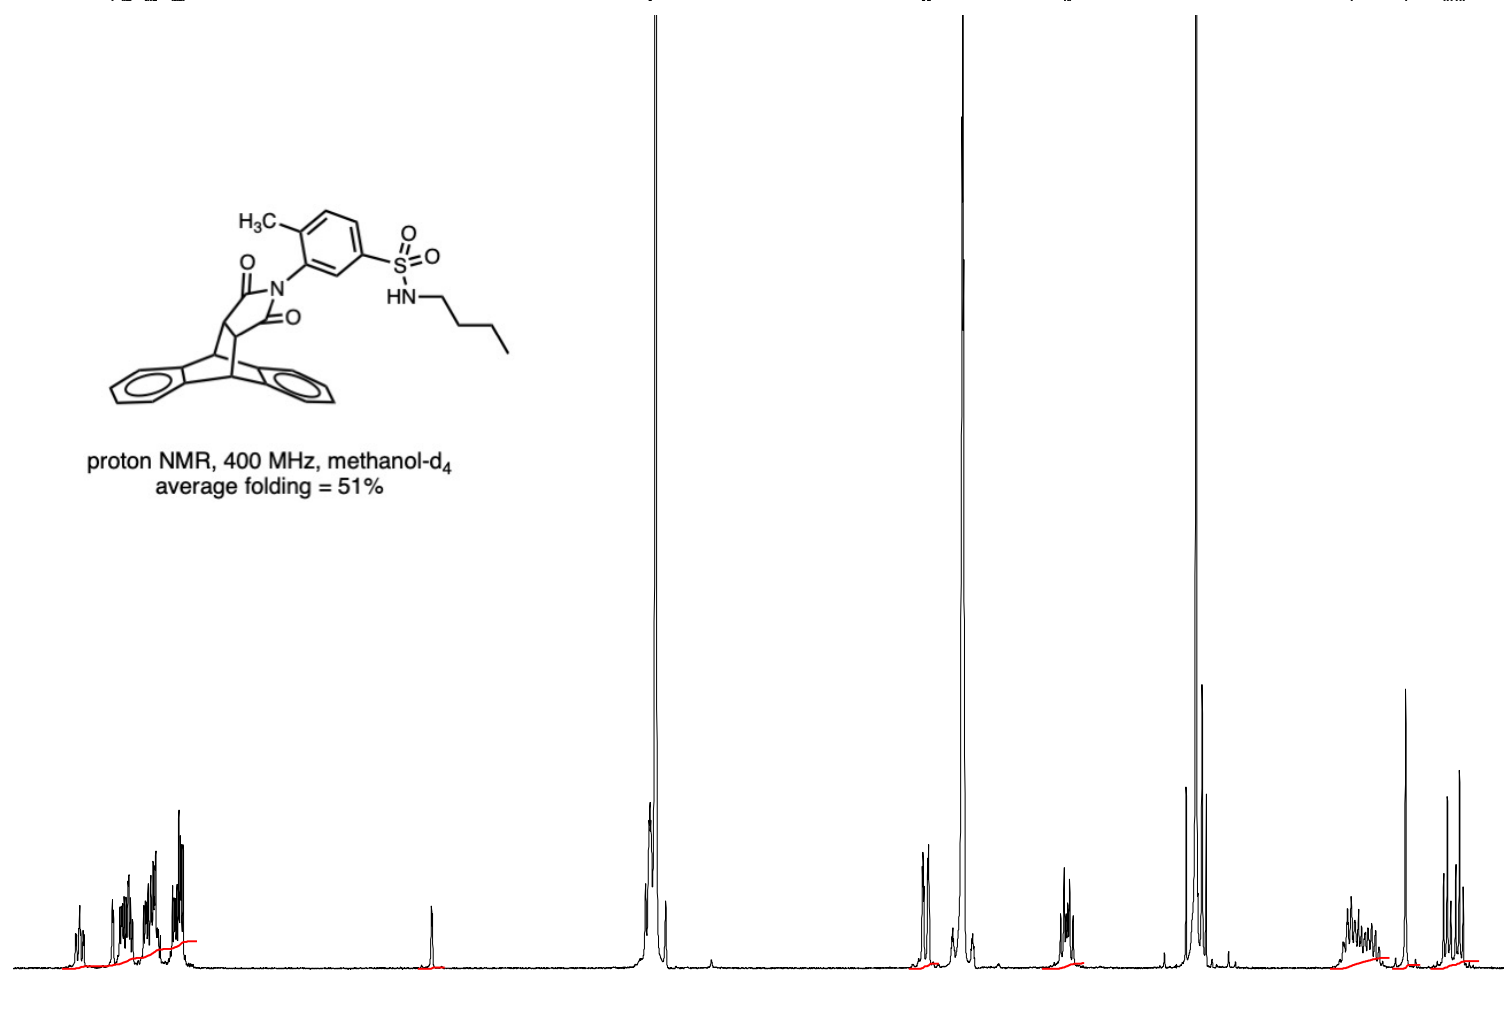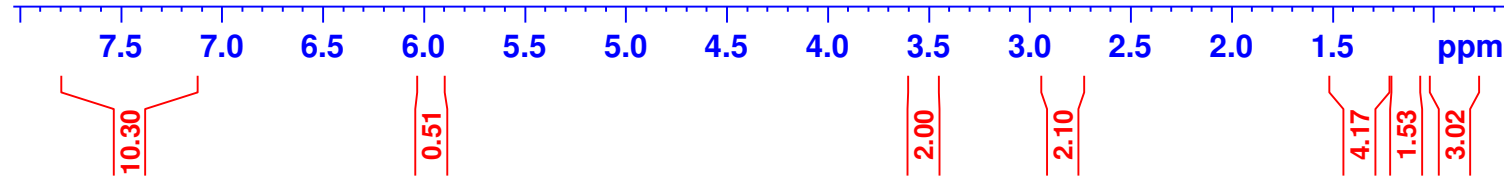

Current Data Parameters  
NAME controlnov19balanceinmethanol  
EXPNO 1  
PROCNO 1

F2 - Acquisition Parameters  
Date\_ 20221119  
Time 16.39  
INSTRUM spect  
PROBHD 5 mm PABBO BB-  
PULPROG zg30  
TD 65536  
SOLVENT MeOD  
NS 16  
DS 2  
SWH 8012.820 Hz  
FIDRES 0.122266 Hz  
AQ 4.0894465 sec  
RG 322  
DW 62.400 usec  
DE 6.50 usec  
TE 298.0 K  
D1 1.00000000 sec  
TD0 1

===== CHANNEL f1 =====  
SFO1 400.1324710 MHz  
NUC1 1H  
P1 9.30 usec  
PLW1 18.00000000 W

F2 - Processing parameters  
SI 65536  
SF 400.1300000 MHz  
WDW EM  
SSB 0  
LB 0.30 Hz  
GB 0  
PC 1.00

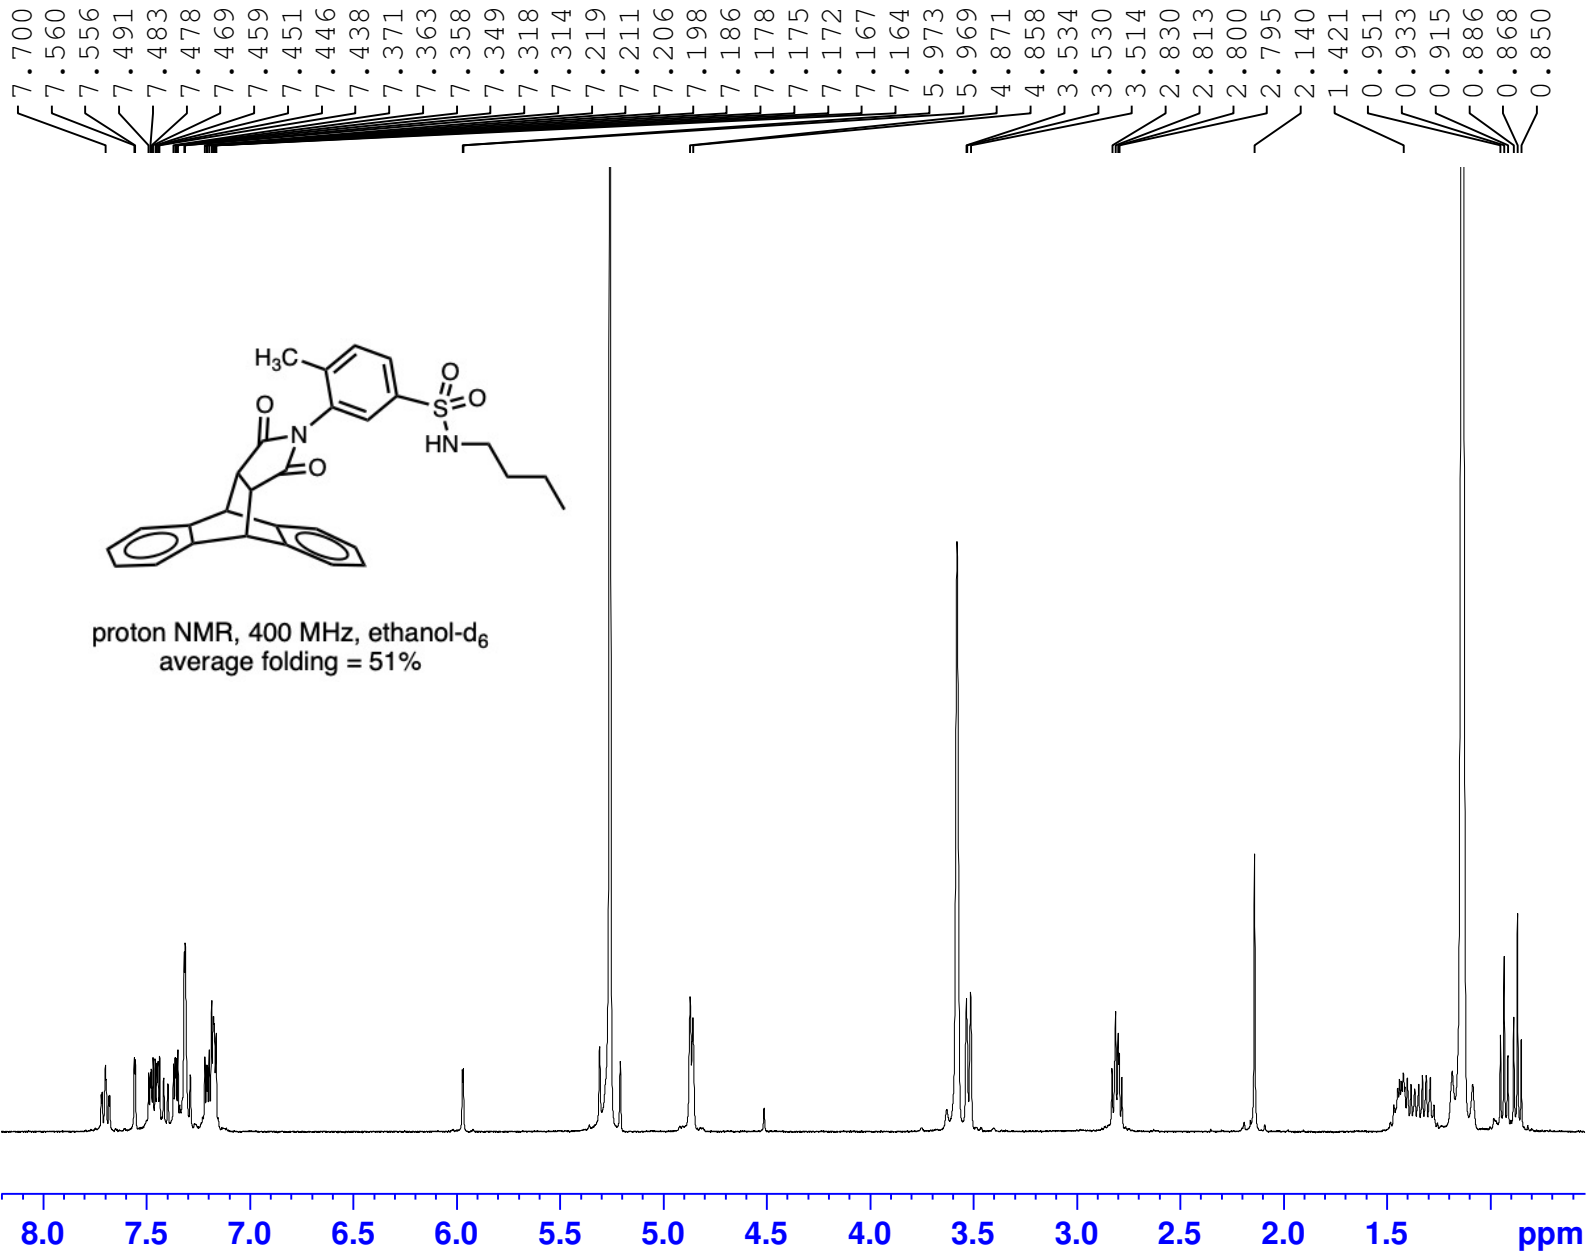

Current Data Parameters  
 NAME controlnov19balancein-ethanol  
 EXPNO 1  
 PROCNO 1

F2 - Acquisition Parameters  
 Date\_ 20221119  
 Time 18.52  
 INSTRUM spect  
 PROBHD 5 mm PABBO BB-  
 PULPROG zg30  
 TD 65536  
 SOLVENT EtOD  
 NS 16  
 DS 2  
 SWH 8012.820 Hz  
 FIDRES 0.122266 Hz  
 AQ 4.0894465 sec  
 RG 322  
 DW 62.400 usec  
 DE 6.50 usec  
 TE 298.0 K  
 D1 1.00000000 sec  
 TD0 1

===== CHANNEL f1 =====  
 SFO1 400.1324710 MHz  
 NUC1 1H  
 P1 9.30 usec  
 PLW1 18.00000000 W

F2 - Processing parameters  
 SI 65536  
 SF 400.1300000 MHz  
 WDW EM  
 SSB 0  
 LB 0.30 Hz  
 GB 0  
 PC 1.00

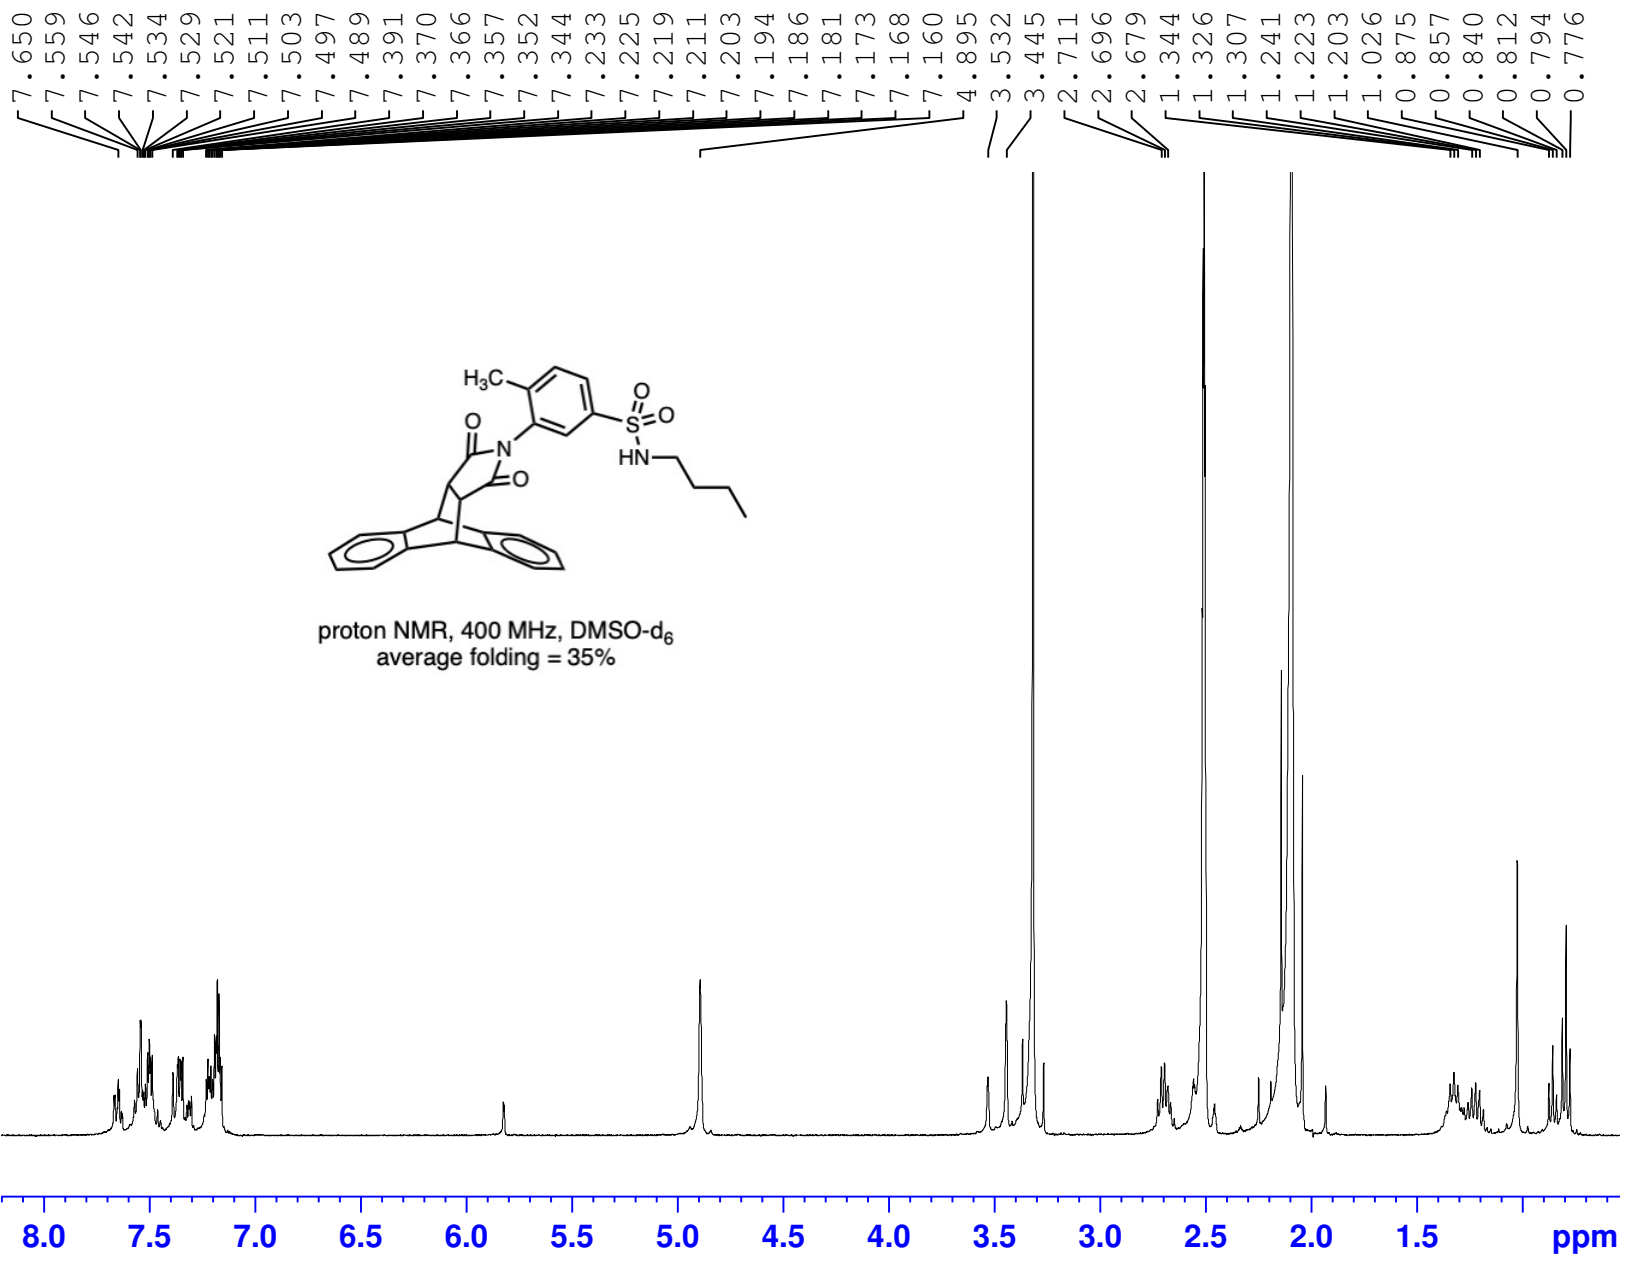

7.650  
7.559  
7.546  
7.542  
7.534  
7.529  
7.521  
7.511  
7.503  
7.497  
7.489  
7.391  
7.370  
7.366  
7.357  
7.352  
7.344  
7.233  
7.225  
7.219  
7.211  
7.203  
7.194  
7.186  
7.181  
7.173  
7.168  
7.160  
4.895  
3.532  
3.445  
2.711  
2.696  
2.679  
1.344  
1.326  
1.307  
1.241  
1.223  
1.203  
1.026  
0.875  
0.857  
0.840  
0.812  
0.794  
0.776

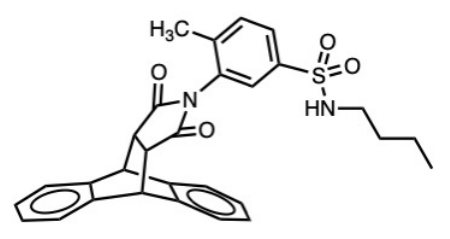

proton NMR, 400 MHz, DMSO-d<sub>6</sub>  
average folding = 35%

Current Data Parameters  
NAME controlnov19balanceindms  
EXPNO 1  
PROCNO 1

F2 - Acquisition Parameters  
Date\_ 20221119  
Time 14.33  
INSTRUM spect  
PROBHD 5 mm PABBO BB-  
PULPROG zg30  
TD 65536  
SOLVENT DMSO  
NS 16  
DS 2  
SWH 8012.820 Hz  
FIDRES 0.122266 Hz  
AQ 4.0894465 sec  
RG 256  
DW 62.400 usec  
DE 6.50 usec  
TE 298.0 K  
D1 1.00000000 sec  
TD0 1

==== CHANNEL f1 =====  
SFO1 400.1324710 MHz  
NUC1 1H  
P1 9.30 usec  
PLW1 18.00000000 W

F2 - Processing parameters  
SI 65536  
SF 400.1300000 MHz  
WDW EM  
SSB 0  
LB 0.30 Hz  
GB 0  
PC 1.00

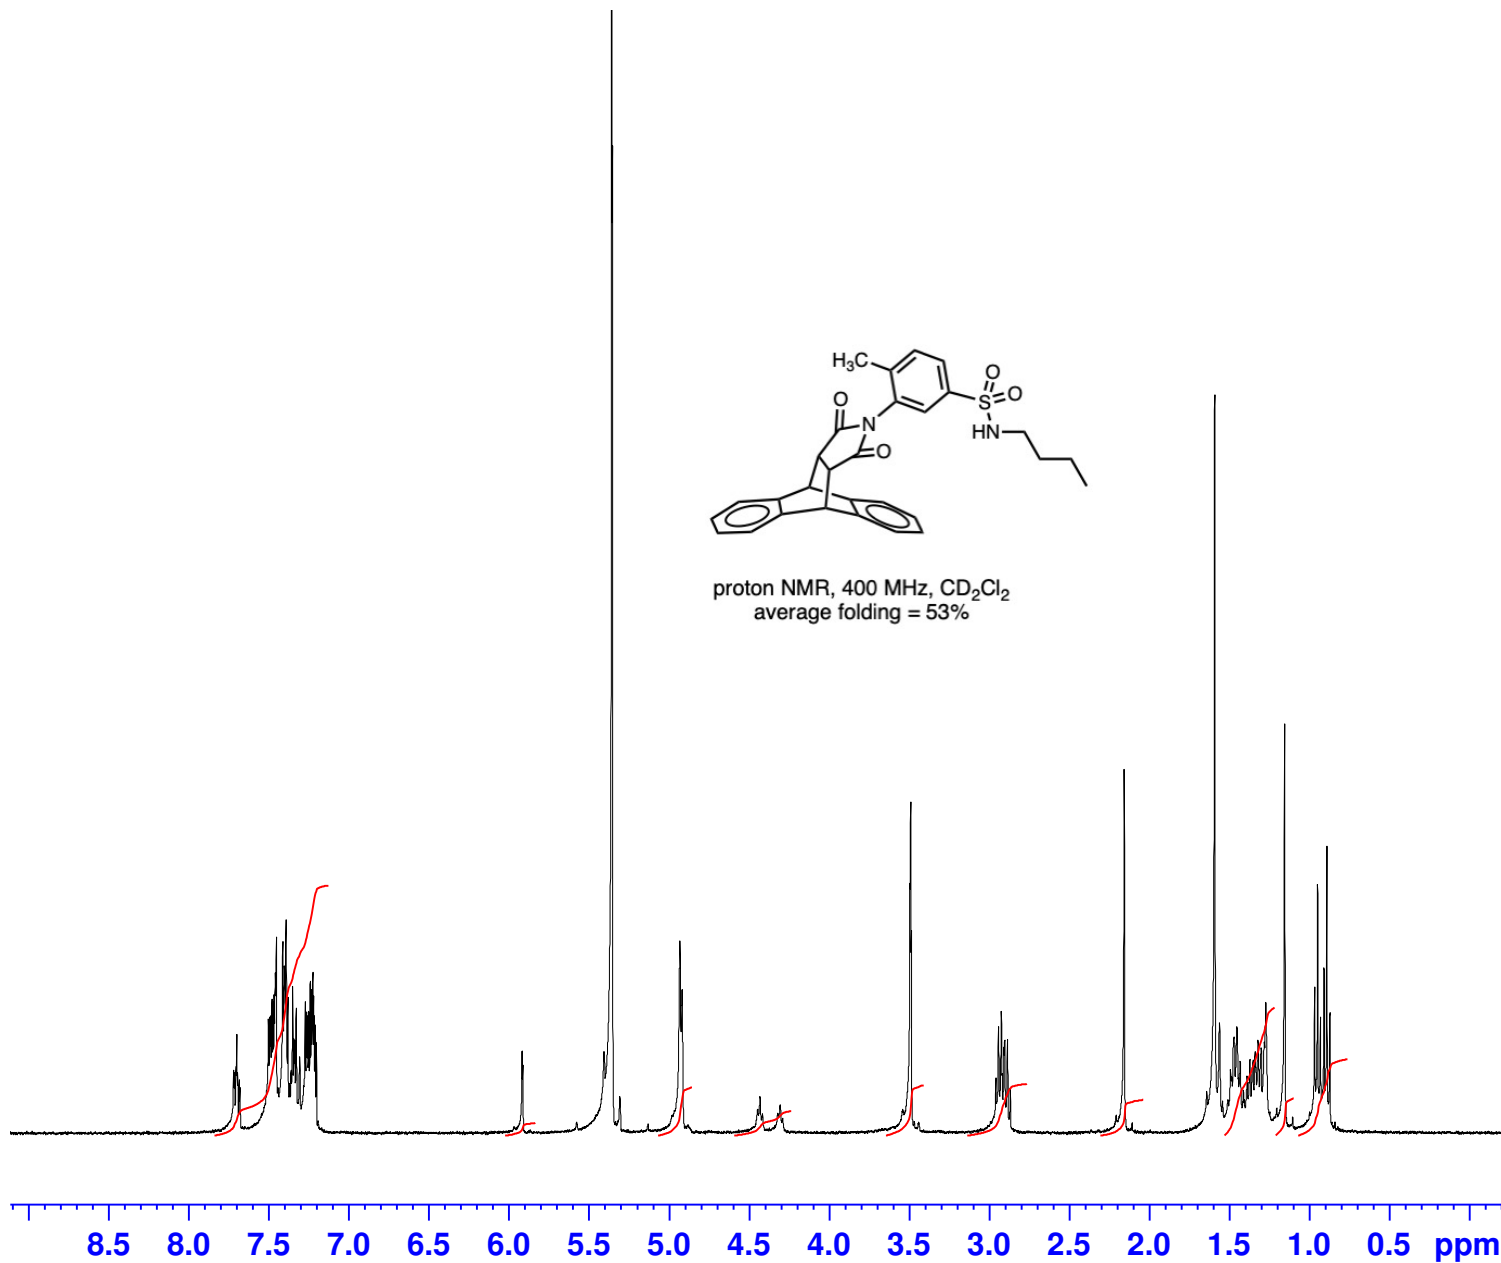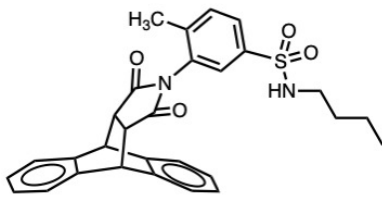

proton NMR, 400 MHz, CD<sub>2</sub>Cl<sub>2</sub>  
average folding = 53%

Current Data Parameters  
 NAME controlnov19balancein-methylenechloride  
 EXPNO 1  
 PROCNO 1

F2 - Acquisition Parameters  
 Date\_ 20221119  
 Time 19.00  
 INSTRUM spect  
 PROBHD 5 mm PABBO BB-  
 PULPROG zg30  
 TD 65536  
 SOLVENT CD2Cl2  
 NS 16  
 DS 2  
 SWH 8012.820 Hz  
 FIDRES 0.122266 Hz  
 AQ 4.0894465 sec  
 RG 575  
 DW 62.400 usec  
 DE 6.50 usec  
 TE 298.0 K  
 D1 1.00000000 sec  
 TD0 1

===== CHANNEL f1 =====  
 SFO1 400.1324710 MHz  
 NUC1 1H  
 P1 9.30 usec  
 PLW1 18.00000000 W

F2 - Processing parameters  
 SI 65536  
 SF 400.1300000 MHz  
 WDW EM  
 SSB 0  
 LB 0.30 Hz  
 GB 0  
 PC 1.00

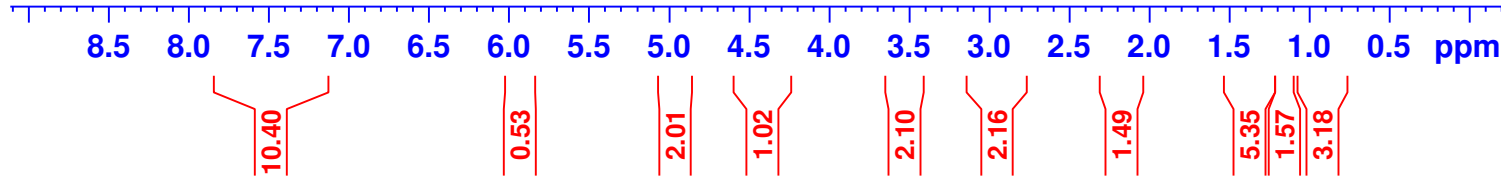



6.942  
6.845  
6.775  
6.767  
6.757  
6.749  
6.744  
6.736  
6.686  
6.673  
6.664  
6.656  
6.634  
6.620  
6.534  
6.526  
6.516  
6.508  
6.503  
6.494  
6.486  
6.472  
6.464  
4.170  
4.131  
2.653  
2.548  
1.462  
0.771  
0.753  
0.735  
0.729  
0.718  
0.693  
0.676  
0.657  
0.638  
0.454  
0.314  
0.297  
0.279  
0.259  
0.241  
0.223

Current Data Parameters  
NAME controlnov19balancein-CCl4  
EXPNO 1  
PROCNO 1

F2 - Acquisition Parameters  
Date\_ 20221119  
Time 19.43  
INSTRUM spect  
PROBHD 5 mm PABBO BB-  
PULPROG zg30  
TD 65536  
SOLVENT CD3CN  
NS 16  
DS 2  
SWH 8012.820 Hz  
FIDRES 0.122266 Hz  
AQ 4.0894465 sec  
RG 645  
DW 62.400 usec  
DE 6.50 usec  
TE 298.0 K  
D1 1.00000000 sec  
TD0 1

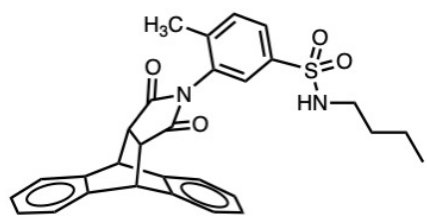

proton NMR, 400 MHz, CCl<sub>4</sub>  
average folding = 46%

===== CHANNEL f1 =====  
SFO1 400.1324710 MHz  
NUC1 1H  
P1 9.30 usec  
PLW1 18.00000000 W

F2 - Processing parameters  
SI 65536  
SF 400.1300000 MHz  
WDW EM  
SSB 0  
LB 0.30 Hz  
GB 0  
PC 1.00

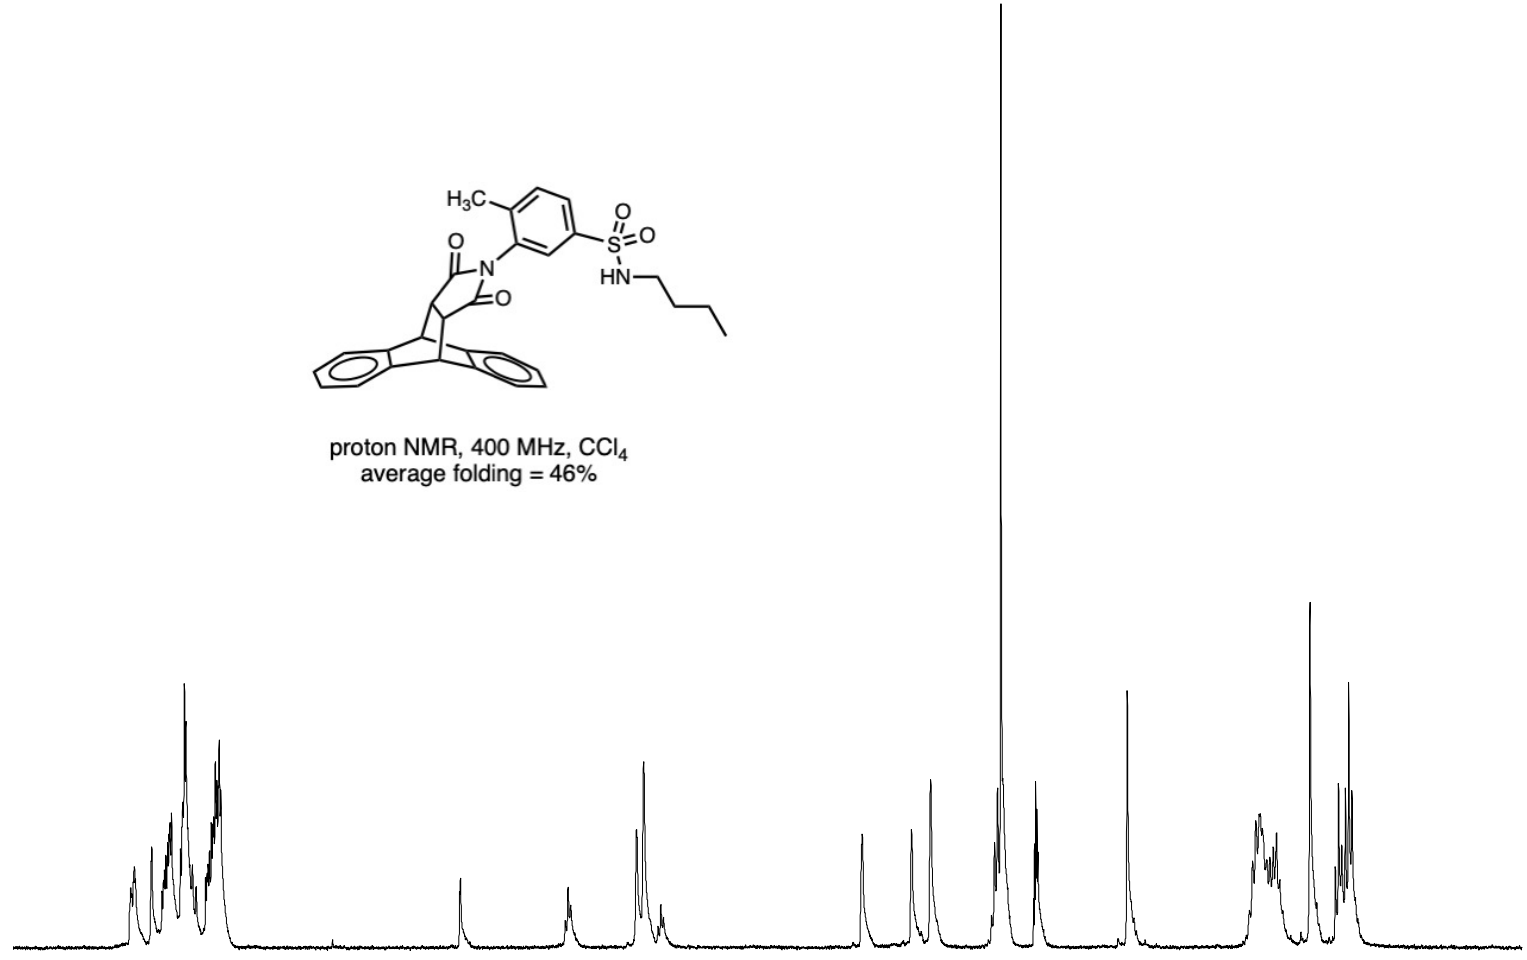

7 6 5 4 3 2 1 0 ppm

9.44 0.46 0.68 2.00 1.00 1.27 4.48 1.75 2.98

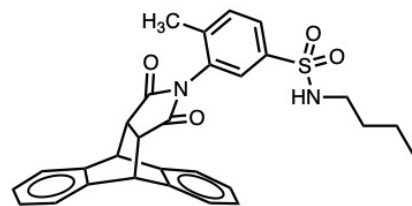

proton NMR, 400 MHz, benzene-d<sub>6</sub>  
average folding = 53%

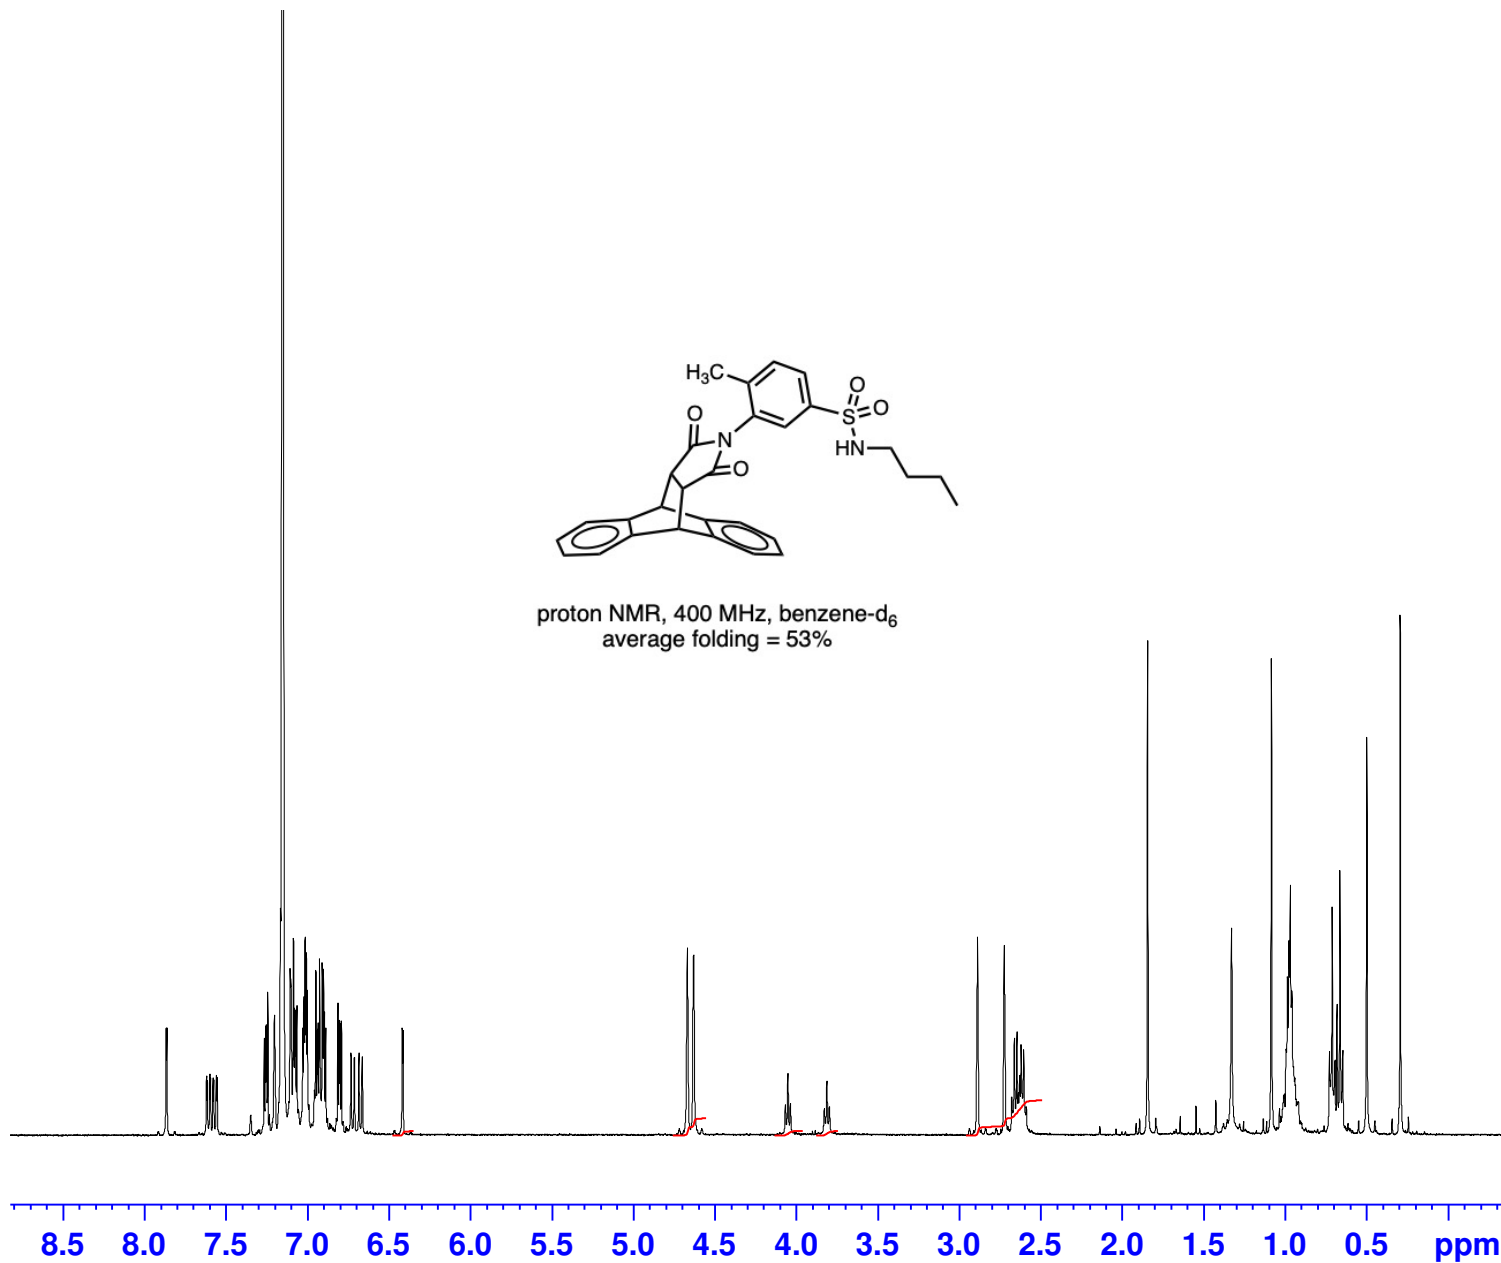

0.53

2.00

0.55

0.53

4.04

Current Data Parameters  
NAME balance-sulfanamide-control-benzene  
EXPNO 1  
PROCNO 1

F2 - Acquisition Parameters  
Date\_ 20221224  
Time 15.31  
INSTRUM spect  
PROBHD 5 mm PABBO BB-  
PULPROG zg30  
TD 65536  
SOLVENT C6D6  
NS 16  
DS 2  
SWH 8012.820 Hz  
FIDRES 0.122266 Hz  
AQ 4.0894465 sec  
RG 256  
DW 62.400 usec  
DE 6.50 usec  
TE 298.0 K  
D1 1.00000000 sec  
TD0 1

==== CHANNEL f1 =====  
SFO1 400.1324710 MHz  
NUC1 1H  
P1 9.30 usec  
PLW1 18.00000000 W

F2 - Processing parameters  
SI 65536  
SF 400.1300000 MHz  
WDW EM  
SSB 0  
LB 0.30 Hz  
GB 0  
PC 1.00

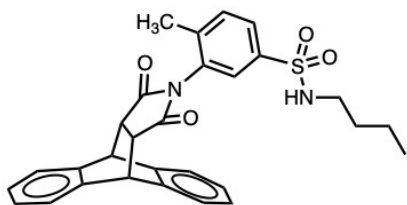

proton NMR, 400 MHz, acetonitrile-d<sub>3</sub>  
average folding = 42%

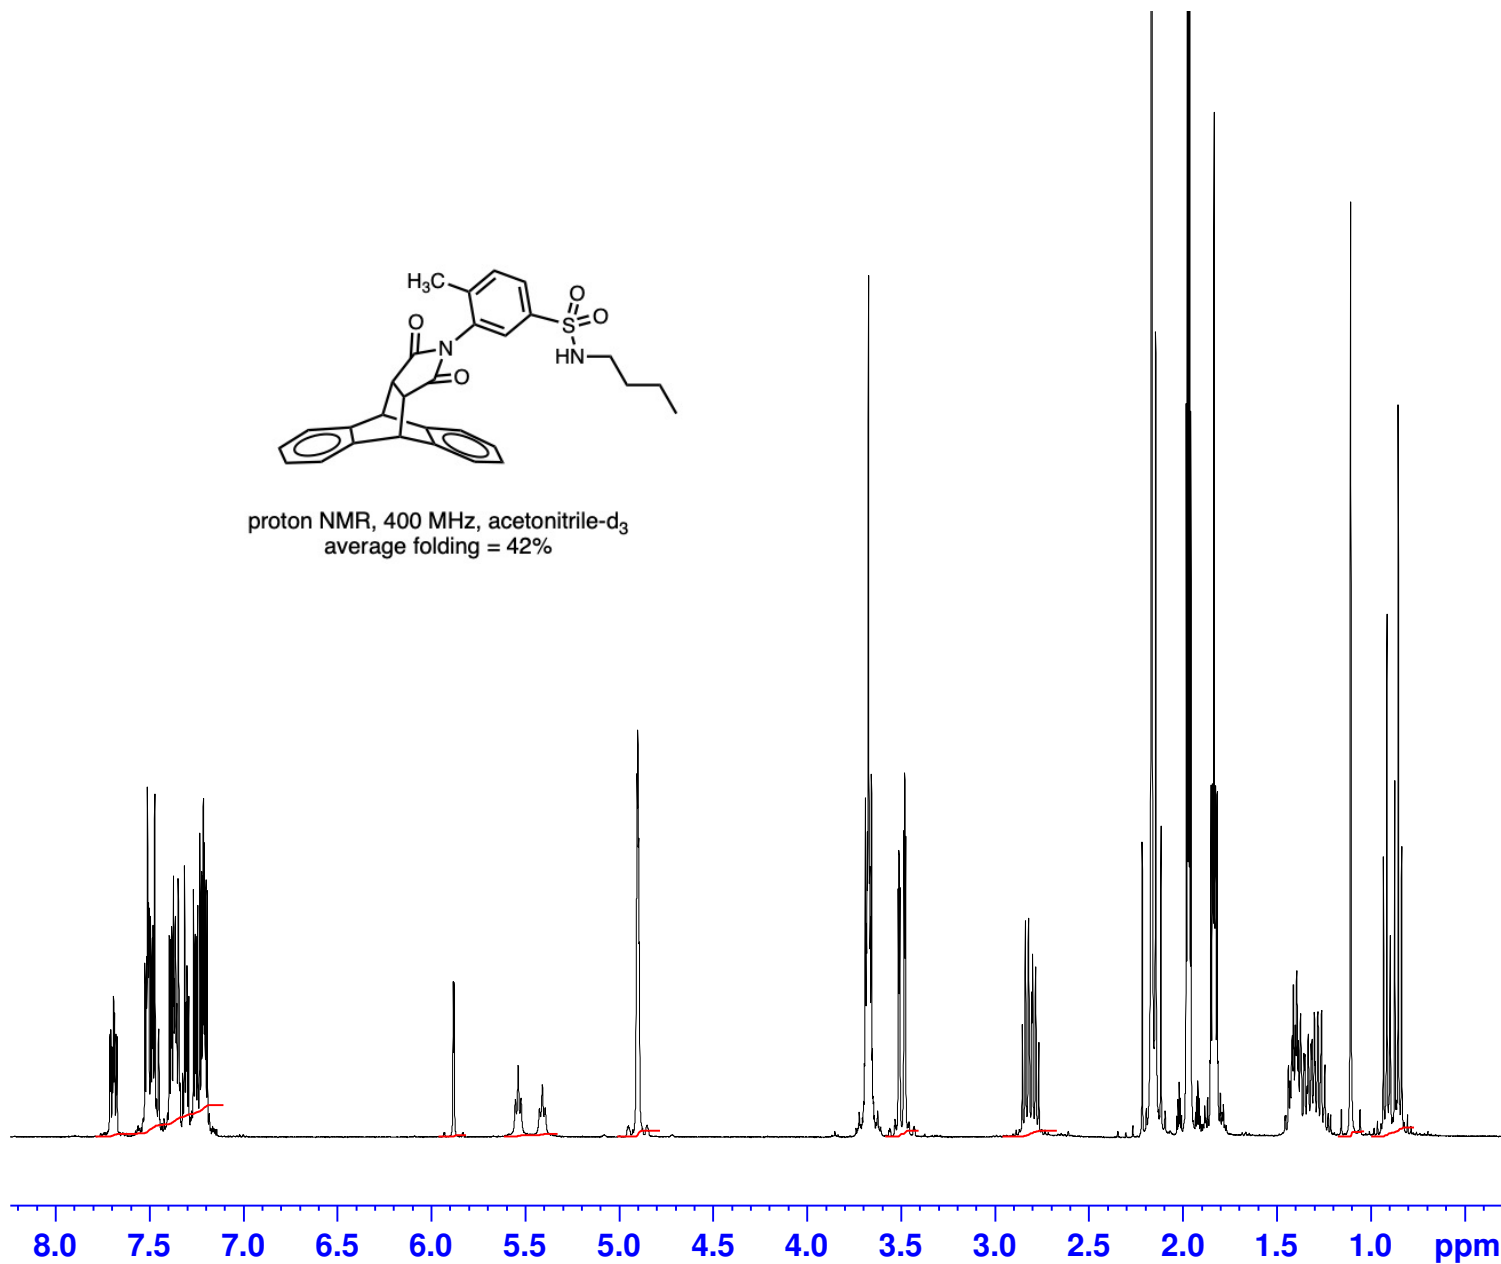

Current Data Parameters  
NAME controlnov19balancein-  
EXPNO 1  
PROCNO 1

F2 - Acquisition Parameters  
Date\_ 20221122  
Time 13.00  
INSTRUM spect  
PROBHD 5 mm PABBO BB-  
PULPROG zg30  
TD 65536  
SOLVENT CD3CN  
NS 160  
DS 2  
SWH 8012.820 Hz  
FIDRES 0.122266 Hz  
AQ 4.0894465 sec  
RG 512  
DW 62.400 usec  
DE 6.50 usec  
TE 298.0 K  
D1 1.00000000 sec  
TD0 1

===== CHANNEL f1 =====  
SFO1 400.1324710 MHz  
NUC1 1H  
P1 9.30 usec  
PLW1 18.00000000 W

F2 - Processing parameters  
SI 65536  
SF 400.1300000 MHz  
WDW EM  
SSB 0  
LB 0.30 Hz  
GB 0  
PC 1.00

8.0 7.5 7.0 6.5 6.0 5.5 5.0 4.5 4.0 3.5 3.0 2.5 2.0 1.5 1.0 ppm

10.55

0.42

0.98

2.00

2.01

2.09

1.70

3.14

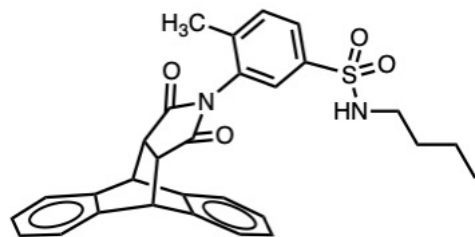

proton NMR, 400 MHz, acetone-d<sub>6</sub>  
average folding = 40%

Current Data Parameters  
NAME controlnov19balanceinacetone  
EXPNO 1  
PROCNO 1

F2 - Acquisition Parameters  
Date\_ 20221119  
Time 15.27  
INSTRUM spect  
PROBHD 5 mm PABBO BB-  
PULPROG zg30  
TD 65536  
SOLVENT Acetone  
NS 16  
DS 2  
SWH 8012.820 Hz  
FIDRES 0.122266 Hz  
AQ 4.0894465 sec  
RG 512  
DW 62.400 usec  
DE 6.50 usec  
TE 298.0 K  
D1 1.00000000 sec  
TD0 1

===== CHANNEL f1 =====  
SF01 400.1324710 MHz  
NUC1 1H  
P1 9.30 usec  
PLW1 18.00000000 W

F2 - Processing parameters  
SI 65536  
SF 400.1300000 MHz  
WDW EM  
SSB 0  
LB 0.30 Hz  
GB 0  
PC 1.00

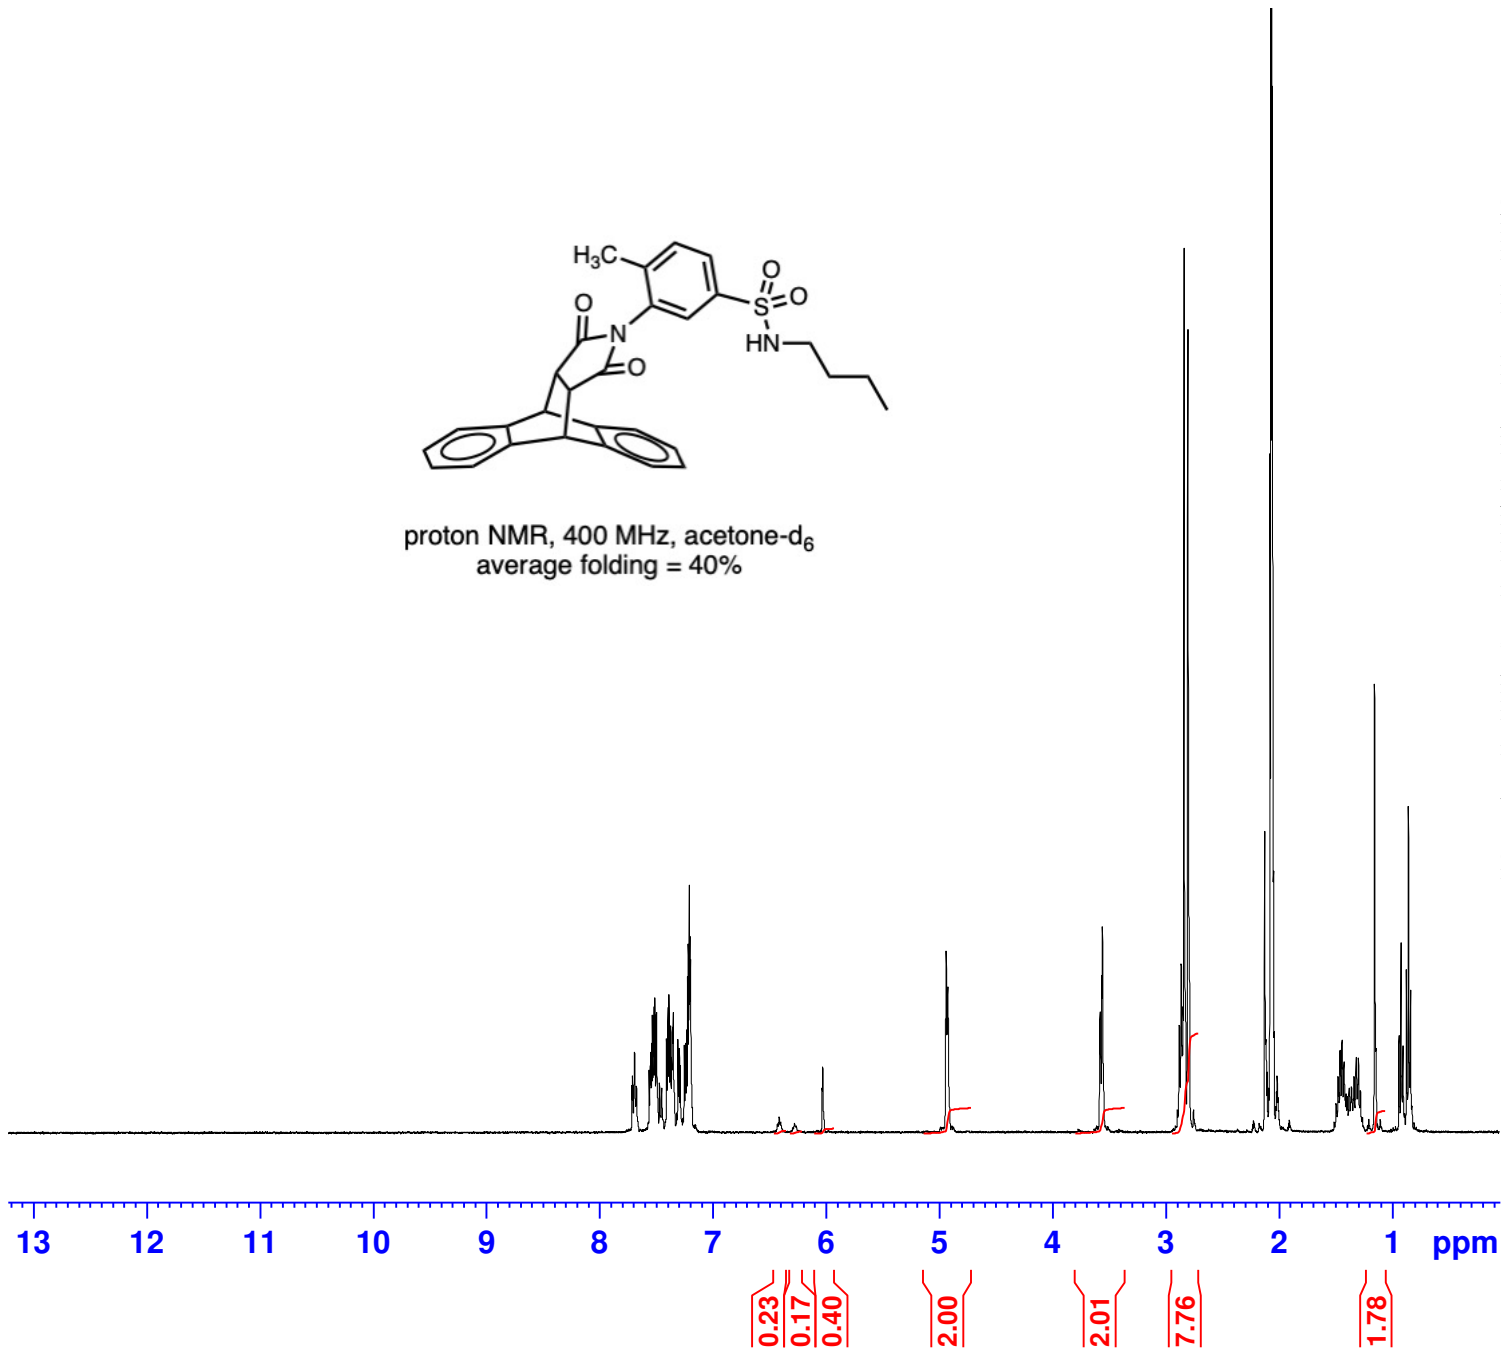

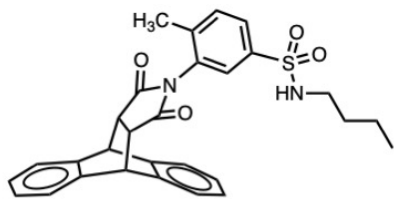

proton NMR, 400 MHz, acetic acid-d<sub>4</sub>  
average folding = 49%

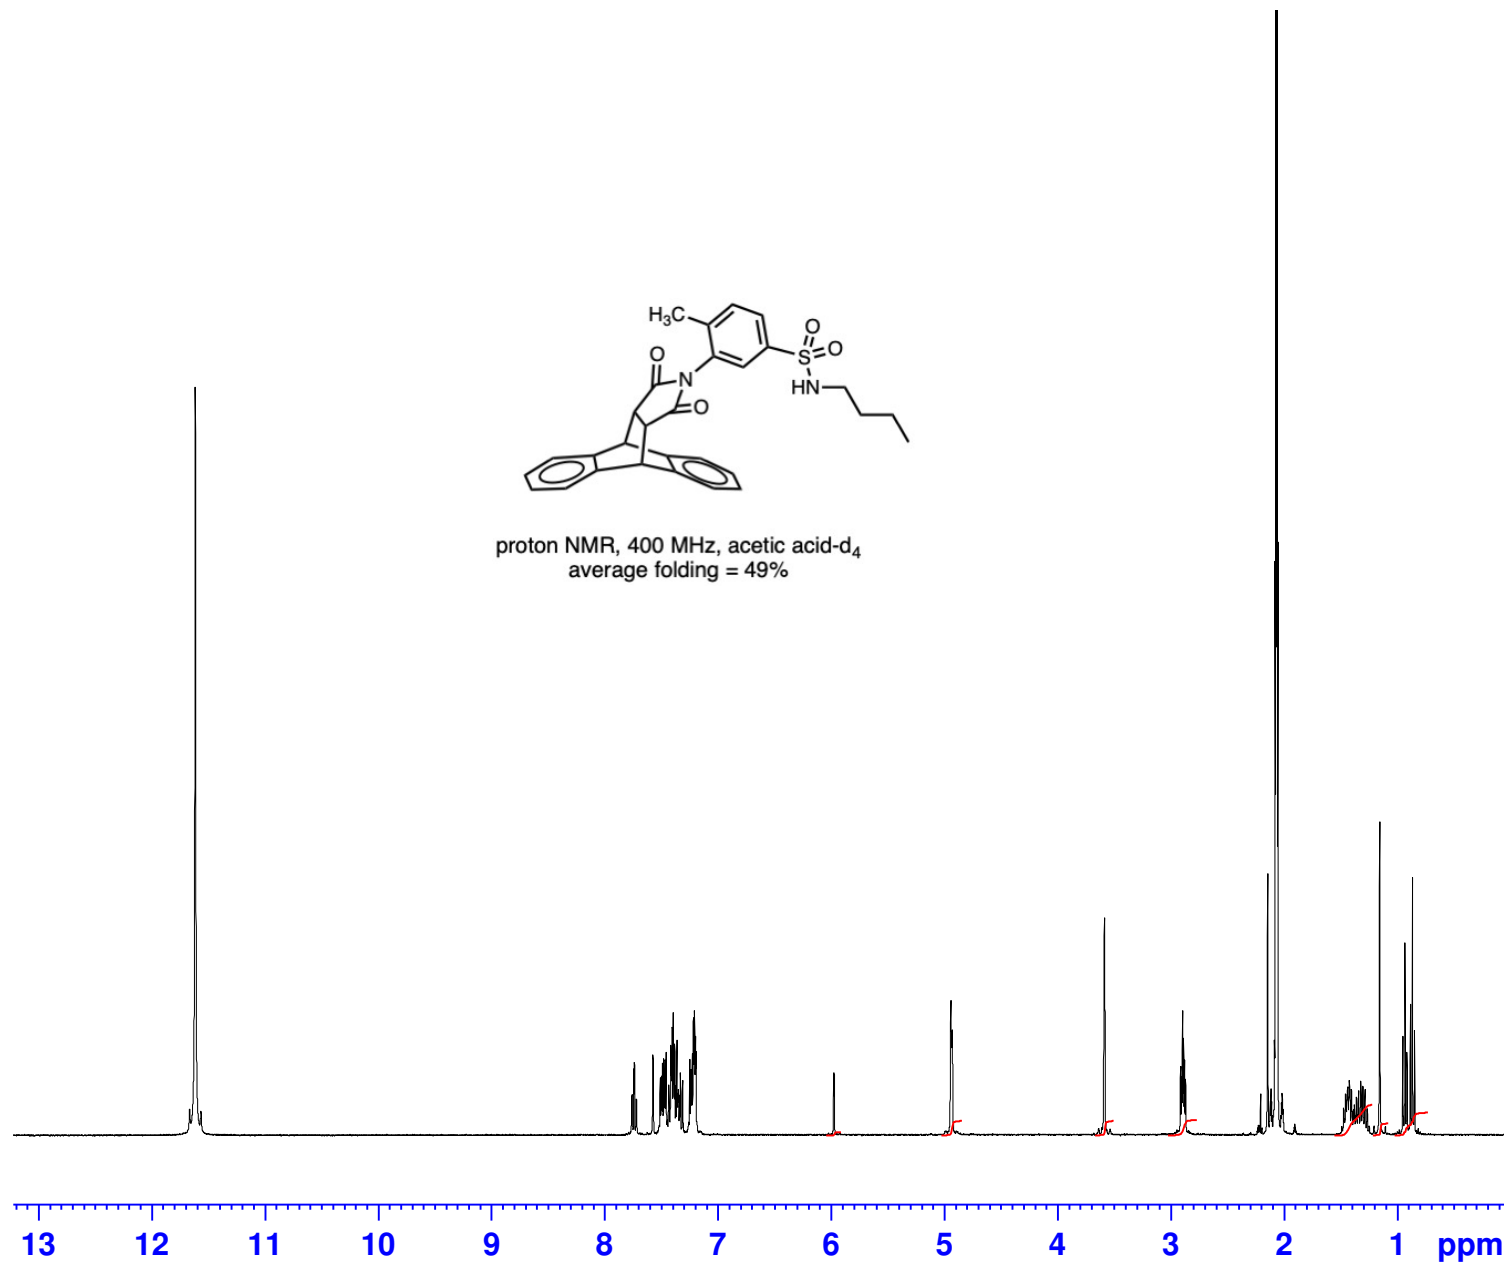

Current Data Parameters  
 NAME controlnov19balanceinaceticacid  
 EXPNO 1  
 PROCNO 1

F2 - Acquisition Parameters  
 Date\_ 20221119  
 Time 16.32  
 INSTRUM spect  
 PROBHD 5 mm PABBO BB-  
 PULPROG zg30  
 TD 65536  
 SOLVENT Acetic  
 NS 16  
 DS 2  
 SWH 8012.820 Hz  
 FIDRES 0.122266 Hz  
 AQ 4.0894465 sec  
 RG 322  
 DW 62.400 usec  
 DE 6.50 usec  
 TE 298.0 K  
 D1 1.00000000 sec  
 TD0 1

===== CHANNEL f1 =====  
 SF01 400.1324710 MHz  
 NUC1 1H  
 P1 9.30 usec  
 PLW1 18.00000000 W

F2 - Processing parameters  
 SI 65536  
 SF 400.1300000 MHz  
 WDW EM  
 SSB 0  
 LB 0.30 Hz  
 GB 0  
 PC 1.00
